# Supplementary material for: Classification of the human phox homology (PX) domains based on their phosphoinositide binding specificities
Source: Springer Nature journal article supplement (doi:10.1038/s41467-019-09355-y), 2019-04-04
Supplement: MOESM1 [file 41467_2019_9355_MOESM1_ESM.pdf]

## **Supplementary Information**

**Supplementary Table 1.** Previously reported structures and PtdIns $P$ -binding specificities of mammalian PX proteins.

**Supplementary Table 2.** PX domain constructs used in this study.

**Supplementary Table 3.** Primers used in this study for site-directed mutagenesis of PX domains.

**Supplementary Table 4.** ITC thermodynamic parameter table.

**Supplementary Table 5.** Blitz kinetic parameter table.

### **Supplementary Figure 1. Gel filtration profiles of purified PX domain used in this study.**

Affinity purified PX domain proteins with GST-tags removed were examined by gel filtration on a Superdex200 10/30 column.

### **Supplementary Figure 2. PX domain binding to phosphoinositides measured by ITC.**

Binding of water-soluble phosphoinositide headgroup analogues (500  $\mu$ M) titrated into selected PX domain proteins (20  $\mu$ M) and measured by ITC. Top panels show the raw data and bottom panels represent the integrated and normalized data fit with a 1:1 binding model. The binding affinities ( $K_d$ ) are provided in **Supplementary Table 1**.

### **Supplementary Figure 3. Comparison of PX domain binding to different phosphoinositides measured by ITC.**

Binding of water-soluble phosphoinositide headgroup analogues (500  $\mu$ M) titrated into selected PX domain proteins (20  $\mu$ M) and measured by ITC. Top panels show the raw data and bottom panels represent the integrated and normalized data fit with a 1:1 binding model. The binding affinities ( $K_d$ ) are provided in **Supplementary Table 1**.

### **Supplementary Figure 4. PX domain binding to phosphoinositides measured by BLItz.**

Biotinylated PC/PE liposomes containing the indicated phosphoinositides were coupled to a streptavidin probe and binding to PX proteins measured at a single concentration of 20  $\mu$ M using the BLItz system. Binding kinetics were calculated using Prism software and are provided in **Supplementary Table 2**.

**Supplementary Figure 5. Comparison of PX domain binding to different phosphoinositides measured by BLItz.**

Biotinylated PC/PE liposomes containing the indicated phosphoinositides were coupled to a streptavidin probe and binding to PX proteins measured at a single concentration of 20  $\mu$ M using the BLItz system. Binding kinetics were calculated using Prism software and are provided in **Supplementary Table 2**.

**Supplementary Figure 6. Crystal structures of the SNX15, SNX23, SGK3, and SNX32 PX domains.**

(A) Cartoon representation of the PX domain of SNX15 bound to sulphate (crystal form 1). The protein forms a domain-swapped dimer, whereby the  $\alpha$ 1 helix is longer than normal leading to swapping of the subsequent  $\alpha$ 2 and  $\alpha$ 3 with an adjacent molecule in the crystal lattice. (B) Cartoon representation of the PX domain of SNX15 (crystal form 2). The protein still forms a domain-swapped dimer, but the C-terminus of the  $\alpha$ 1 helix unfolds to form a longer extended structure. (C) Analytical gel filtration profile of the SNX15 PX domain (compared with the standard calibration curve). The solid line represents the normalized UV absorbance at 280 nm. The chromatogram peak represents the corresponding measured molecular weight in kDa. (D) (Left) Cartoon representation of the SNX23/Kif16B PX domain. (Right) Overlay of the three SNX23 chains within the asymmetric unit with the previous SNX23 PX domain structure in complex with sulphate (PDB ID 2V14). (E) (Left) Cartoon representation of the SGK3 PX domain. (Right) Overlay of the SGK3 structure with the two chains of the asymmetric unit within the previous SGK3 PX domain structure (PDB ID 1XTN).

**Supplementary Figure 7. Sequence and crystal structure of the SNX32 PX domain in complex with IncE.**

(A) Sequence alignment of human SNX32, SNX5, SNX6 and SNX1 PX domains. Conserved residues are indicated in red. Side-chains that directly interact with IncE in the crystal structure are indicated with black circles. Alignment was made with ESPRIPT (Robert and Gouet, 2014). (B) Cartoon diagram (shown in wall-eye stereo) showing the crystal structure of the human SNX32 PX domain (green) in complex with IncE (residues 108-132) (orange). All structure images were generated using PyMOL (Delano Scientific). The extended helix-turn-helix structure composed of helices  $\alpha'$  and  $\alpha''$  extends towards to the top of the image. (C) Superposition of the crystal structure of the SNX32 PX domain complex with IncE (green and

orange) with that of the previous SNX5-IncE structure (black and blue) (PDB ID 5TGI) (Paul et al., 2017). Structures are shown in backbone ribbon representation. **(D and E)** Two close up views of the SNX32-IncE interface highlighting the important interactions between the two proteins. **(F)** The relative sequence conservation of SNX32 side-chains are plotted on the surface representation from blue (highly conserved) to white (not conserved). The IncE peptide is shown in orange cartoon representation. The conservation was calculated using CONSURF (Ashkenazy et al., 2016).

#### **Supplementary Figure 8. NMR structure of the SNX25 PX domain.**

**(A)** 2D  $^1\text{H}$ - $^{15}\text{N}$ -HSQC spectra of the SNX25 PX domain at 500  $\mu\text{M}$  with sequence-specific assignments shown. **(B)** The 20 lowest energy NMR structures calculated for the SNX25 PX domain, shown in wall-eye stereo. **(C)** Solution NMR structure of the SNX25 PX domain in ribbon diagram. **(D)** Sequence alignment of the SNX25 PX domain with the other human RGS-PX family members. Secondary structure is indicated based on the SNX25 NMR structure. **(E)** Structural overlay of the SNX25 PX domain NMR structure with the SNX14 and SNX19 PX domains determined by X-ray crystallography (PDB IDs 4P2J and 4PQO respectively) (Mas et al., 2014).

#### **Supplementary Figure 9. Conservation of canonical and secondary site amino-acid sequences needed for phosphoinositide binding.**

Black and grey indicates non-conservative and conservative substitutions respectively. The phosphoinositide-binding group is indicated in the last column, and lower case grey letters indicate predictions of the phosphoinositide-binding preference based on the sequences of the proteins.

#### **Supplementary Figure 10. Binding of SNX25 to phosphoinositides by NMR.**

2D  $^1\text{H}$ - $^{15}\text{N}$ -HSQC spectra of the SNX25 PX domain at 50  $\mu\text{M}$  were recorded in the presence of increasing molar ratios of the indicated di-C8 soluble phosphoinositide species. PtdIns and mono-phosphorylated PtdIns3P and PtdIns4P did not show significant binding. Di and tri-phosphorylated species however resulted in significant chemical shift perturbations.

#### **Supplementary Figure 11. PX domain mutants binding to phosphoinositides measured by ITC.**

Binding of water-soluble phosphoinositide headgroup analogues (500  $\mu\text{M}$ ) titrated into selected PX domain proteins and their mutants (20  $\mu\text{M}$ ) measured by ITC. Top panels show the raw data and bottom panels represent the integrated and normalized data fit with a 1:1 binding model. The binding affinities ( $K_d$ ) are provided in **Supplementary Table 1**.

**Supplementary Figure 12. Raw gel images for Figure 1 and Figure 2.**

All gels were stained with Coomassie Blue.

**SNX15\_H66A\_Monomer**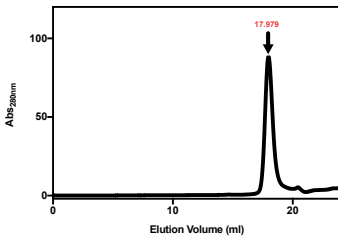**SH3PXD2A\_PX**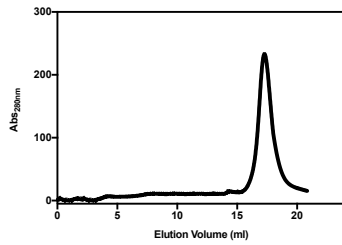**HS1BP3\_PX**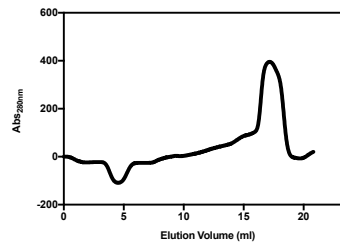**IRAS\_PX**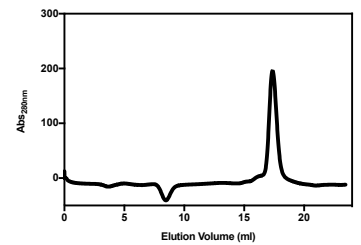**p40phox\_PX**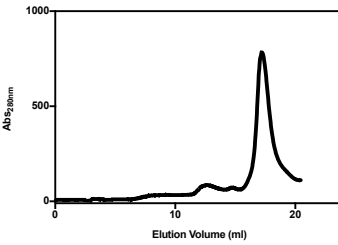**RICS\_PX**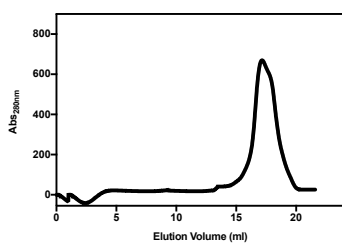**SNX5\_PX**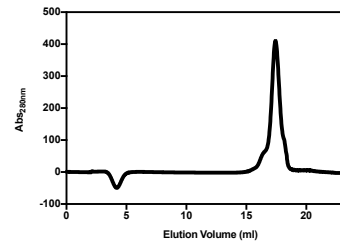**RPS6KC1\_PX**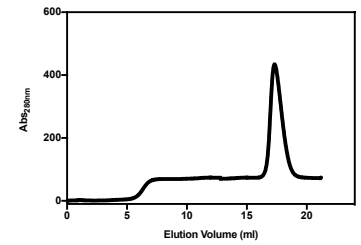**SNX1\_PX**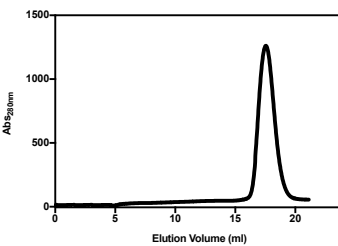**SNX9\_PX**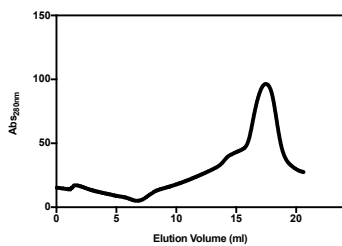**SNX6\_PX**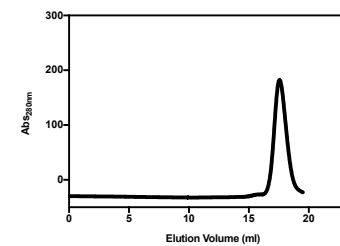**SNX2\_PX**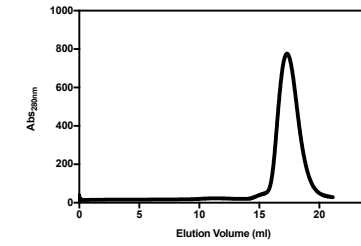**SNX2\_2\_PX**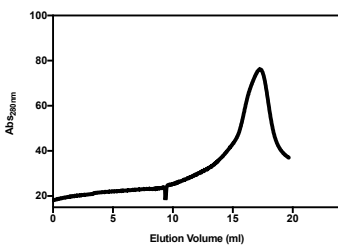**SNX34\_PX**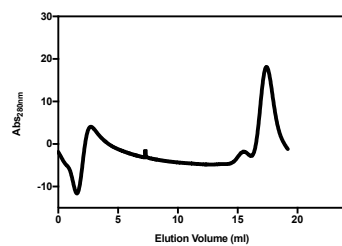**SNX4\_PX**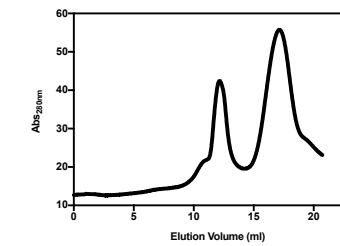**SNX7\_PX**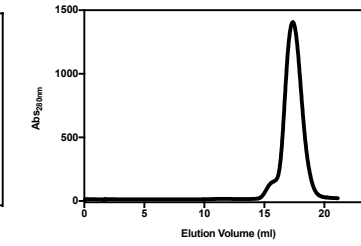**SNX8\_PX**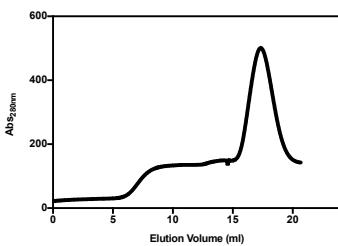**SNX11\_PX**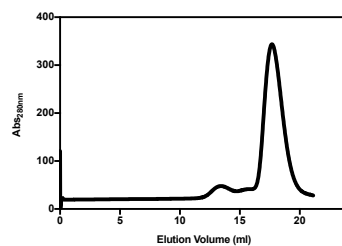**SNX12\_PX**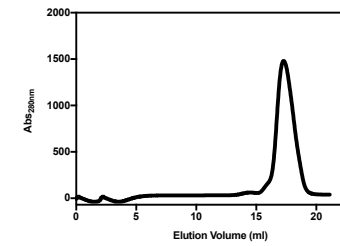**SNX16\_PX**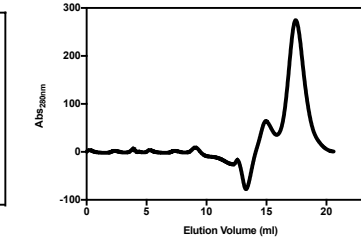**SNX13\_PX**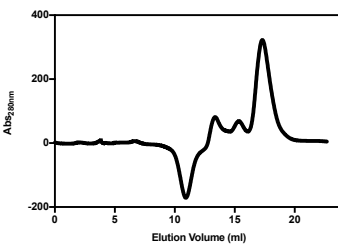**SNX23\_PX**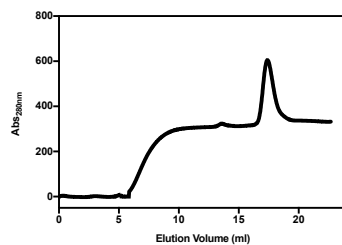**SNX17\_PX**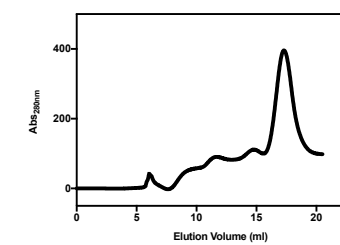**SNX25\_PX**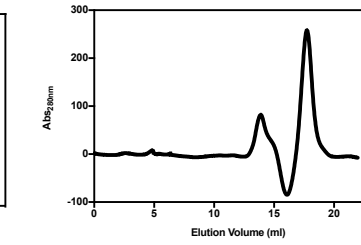**SNX18\_PX**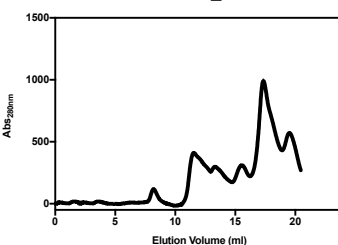**SNX23\_HK\_PX**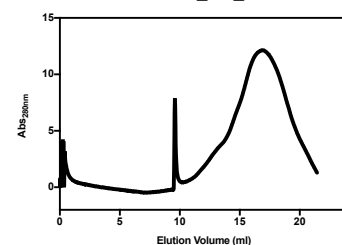**SNX22\_PX**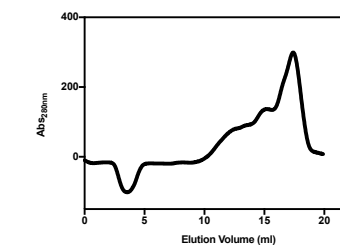**SNX24\_HK\_PX**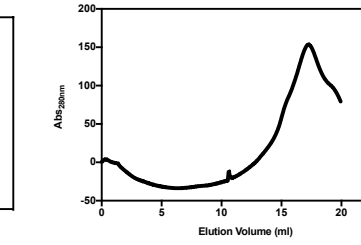

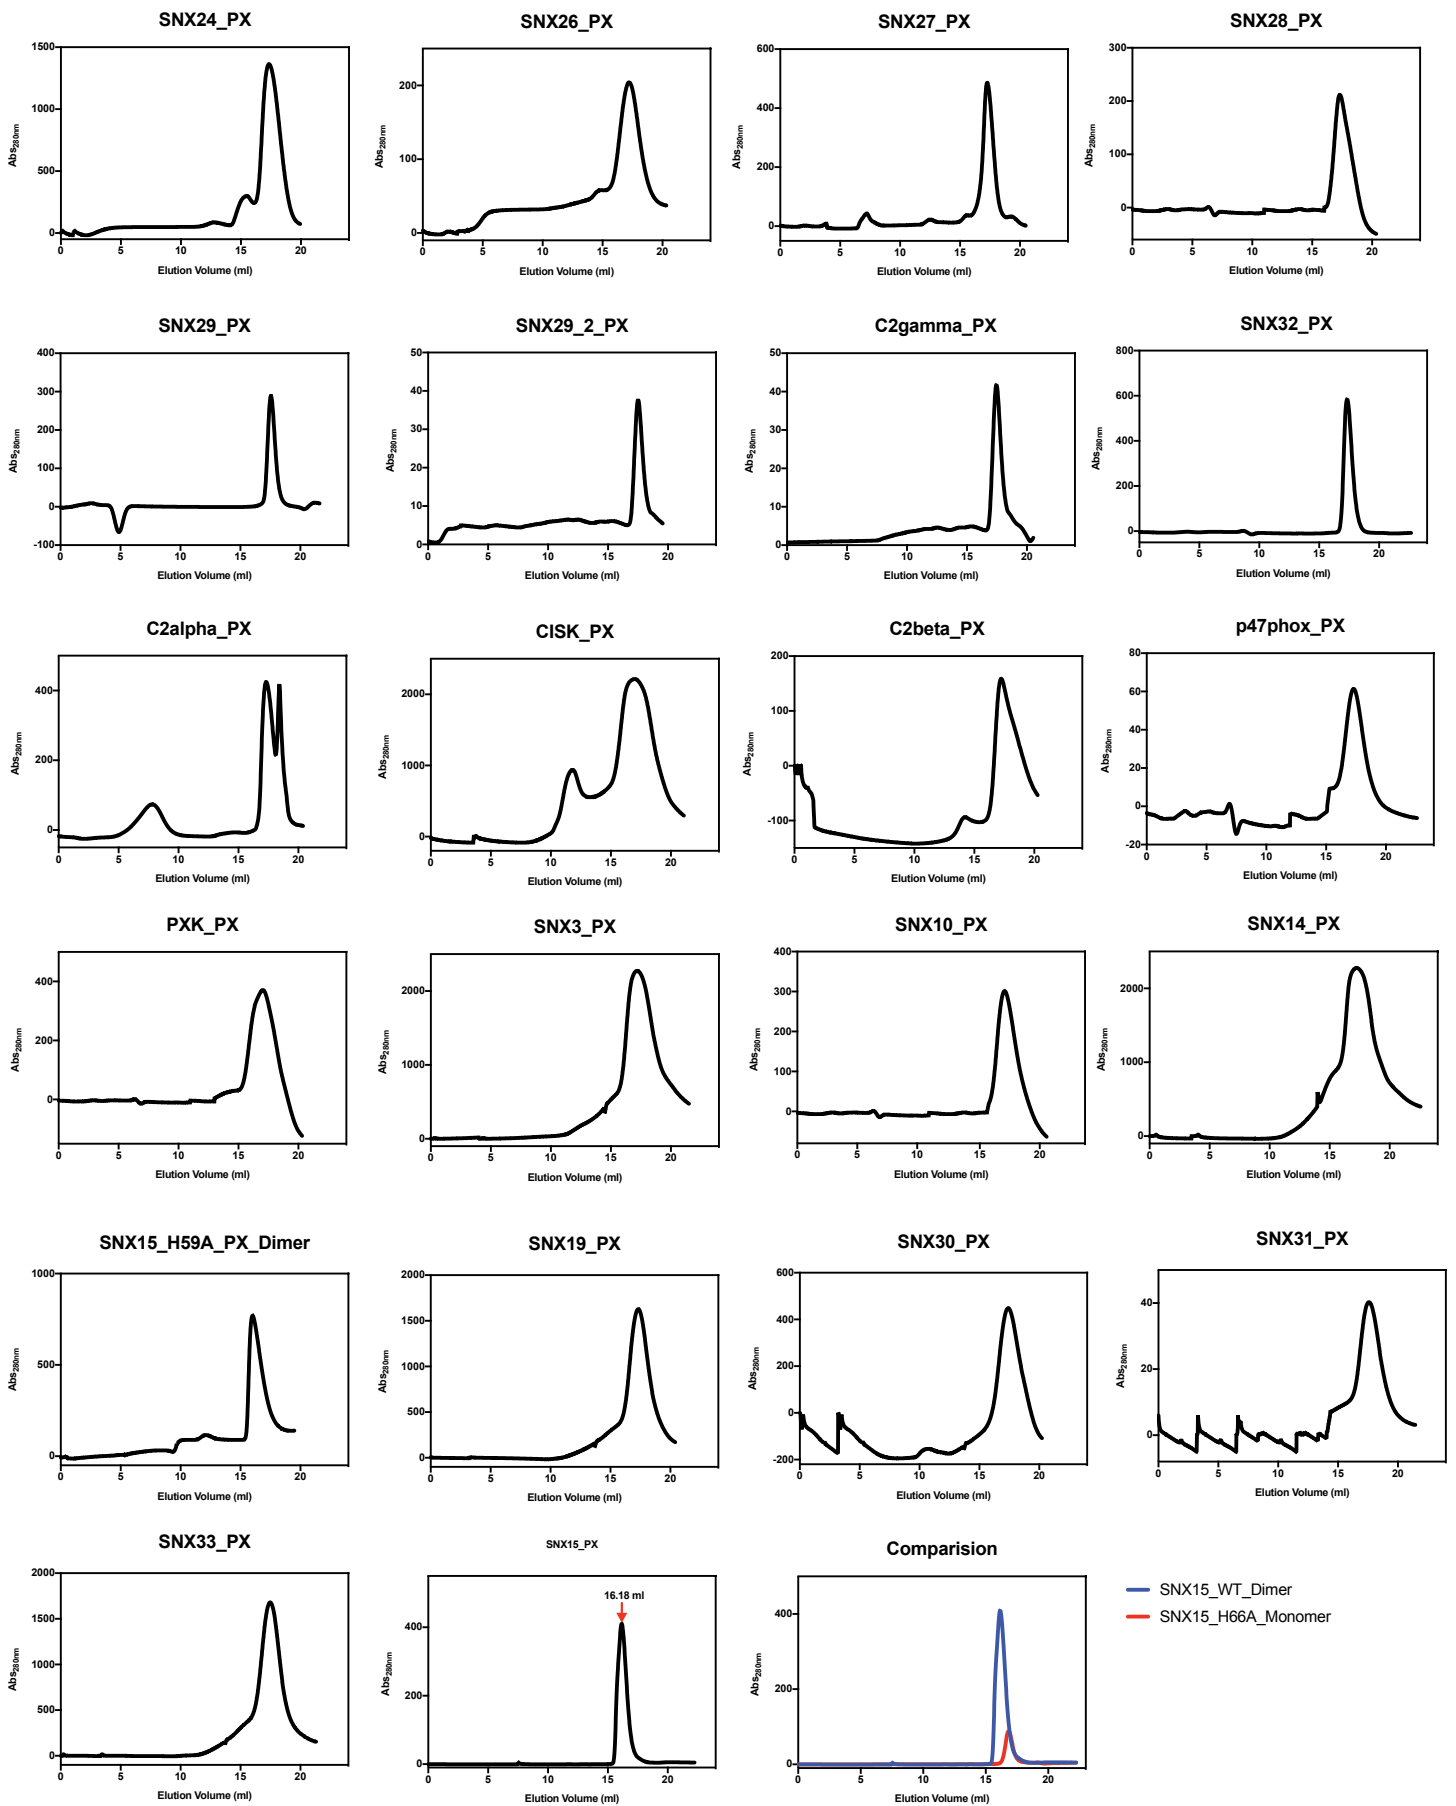

**Figure S1. Gel filtration profiles of purified PX domain used in this study.**

Affinity purified PX domain proteins with GST-tags removed were examined by gel filtration on a Superdex200 10/30 column.

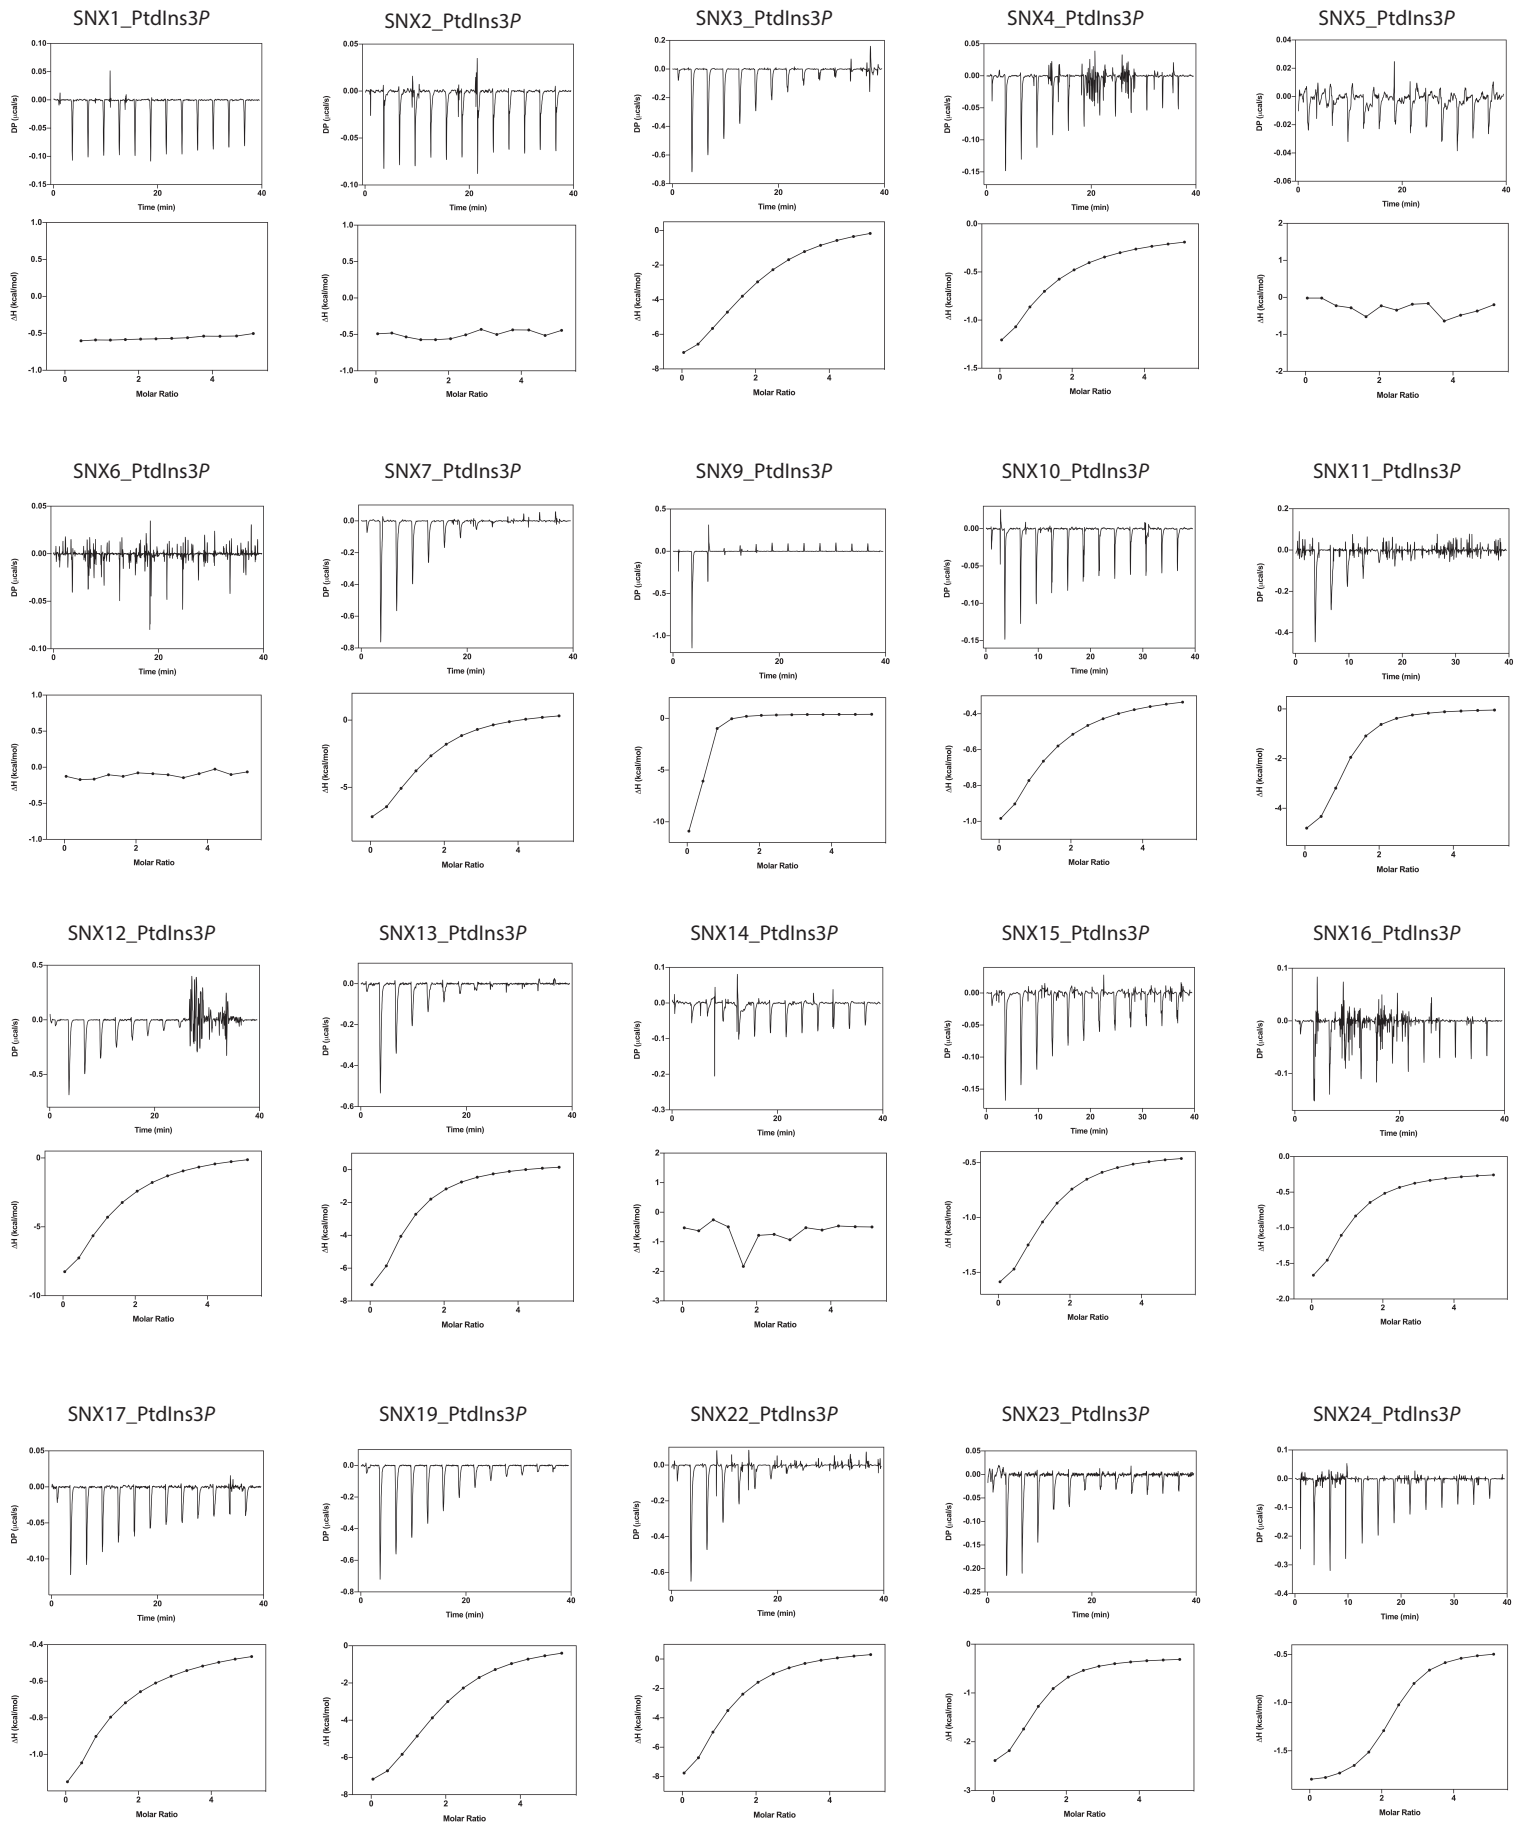

PtdIns3P

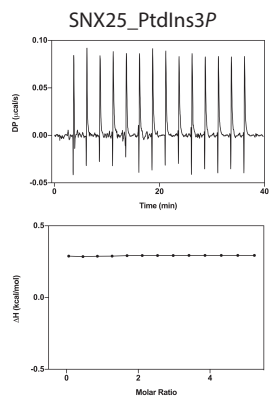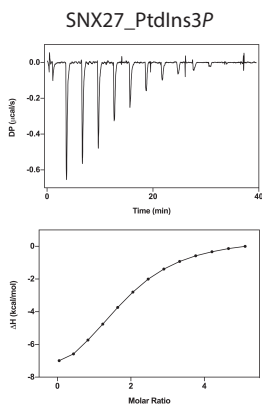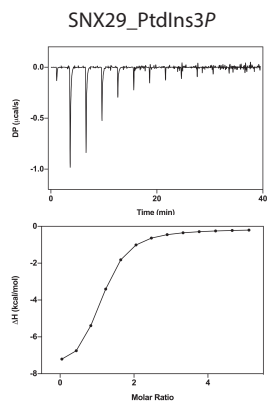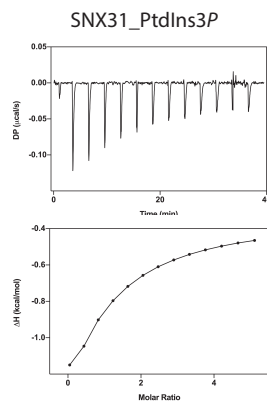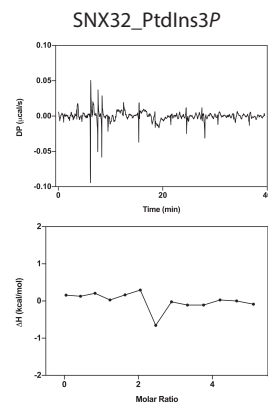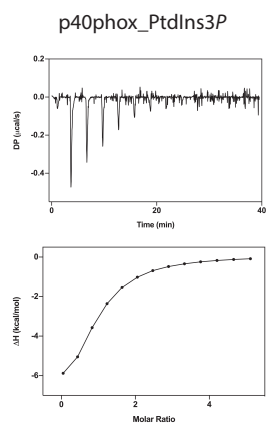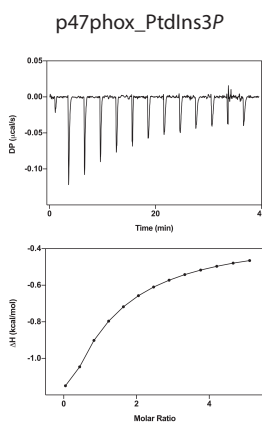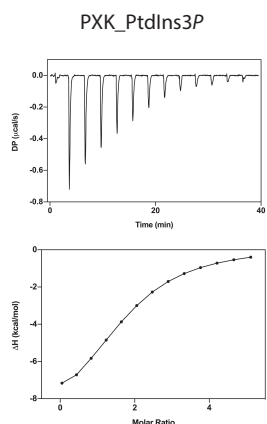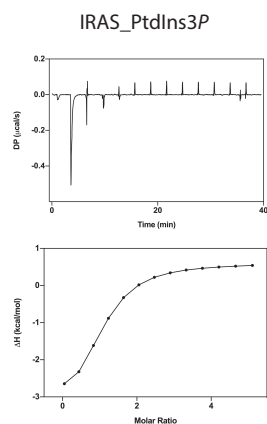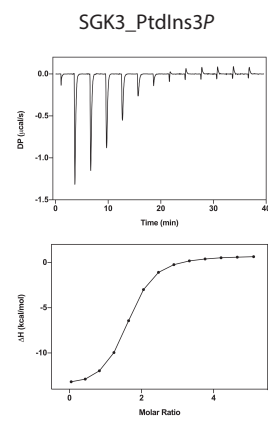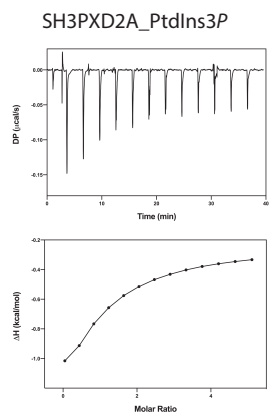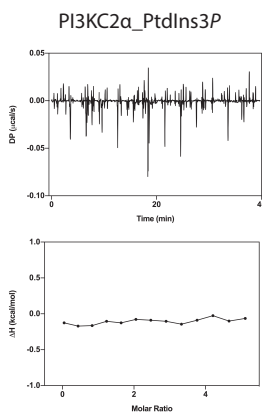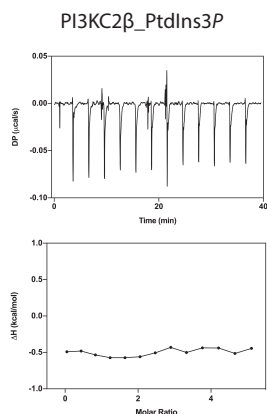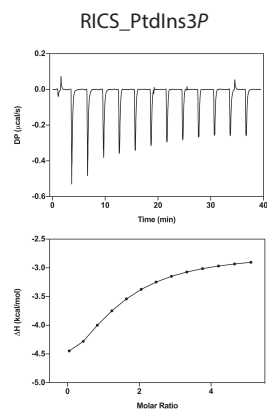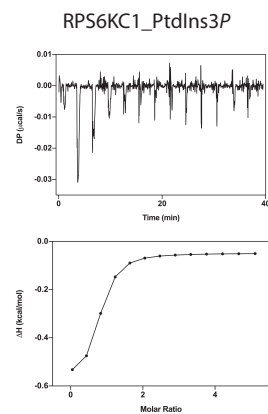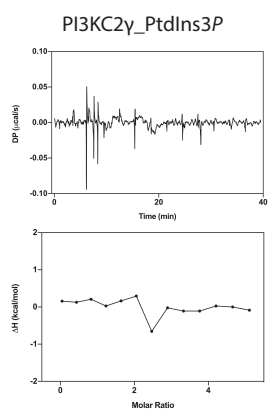

PtdIns3P

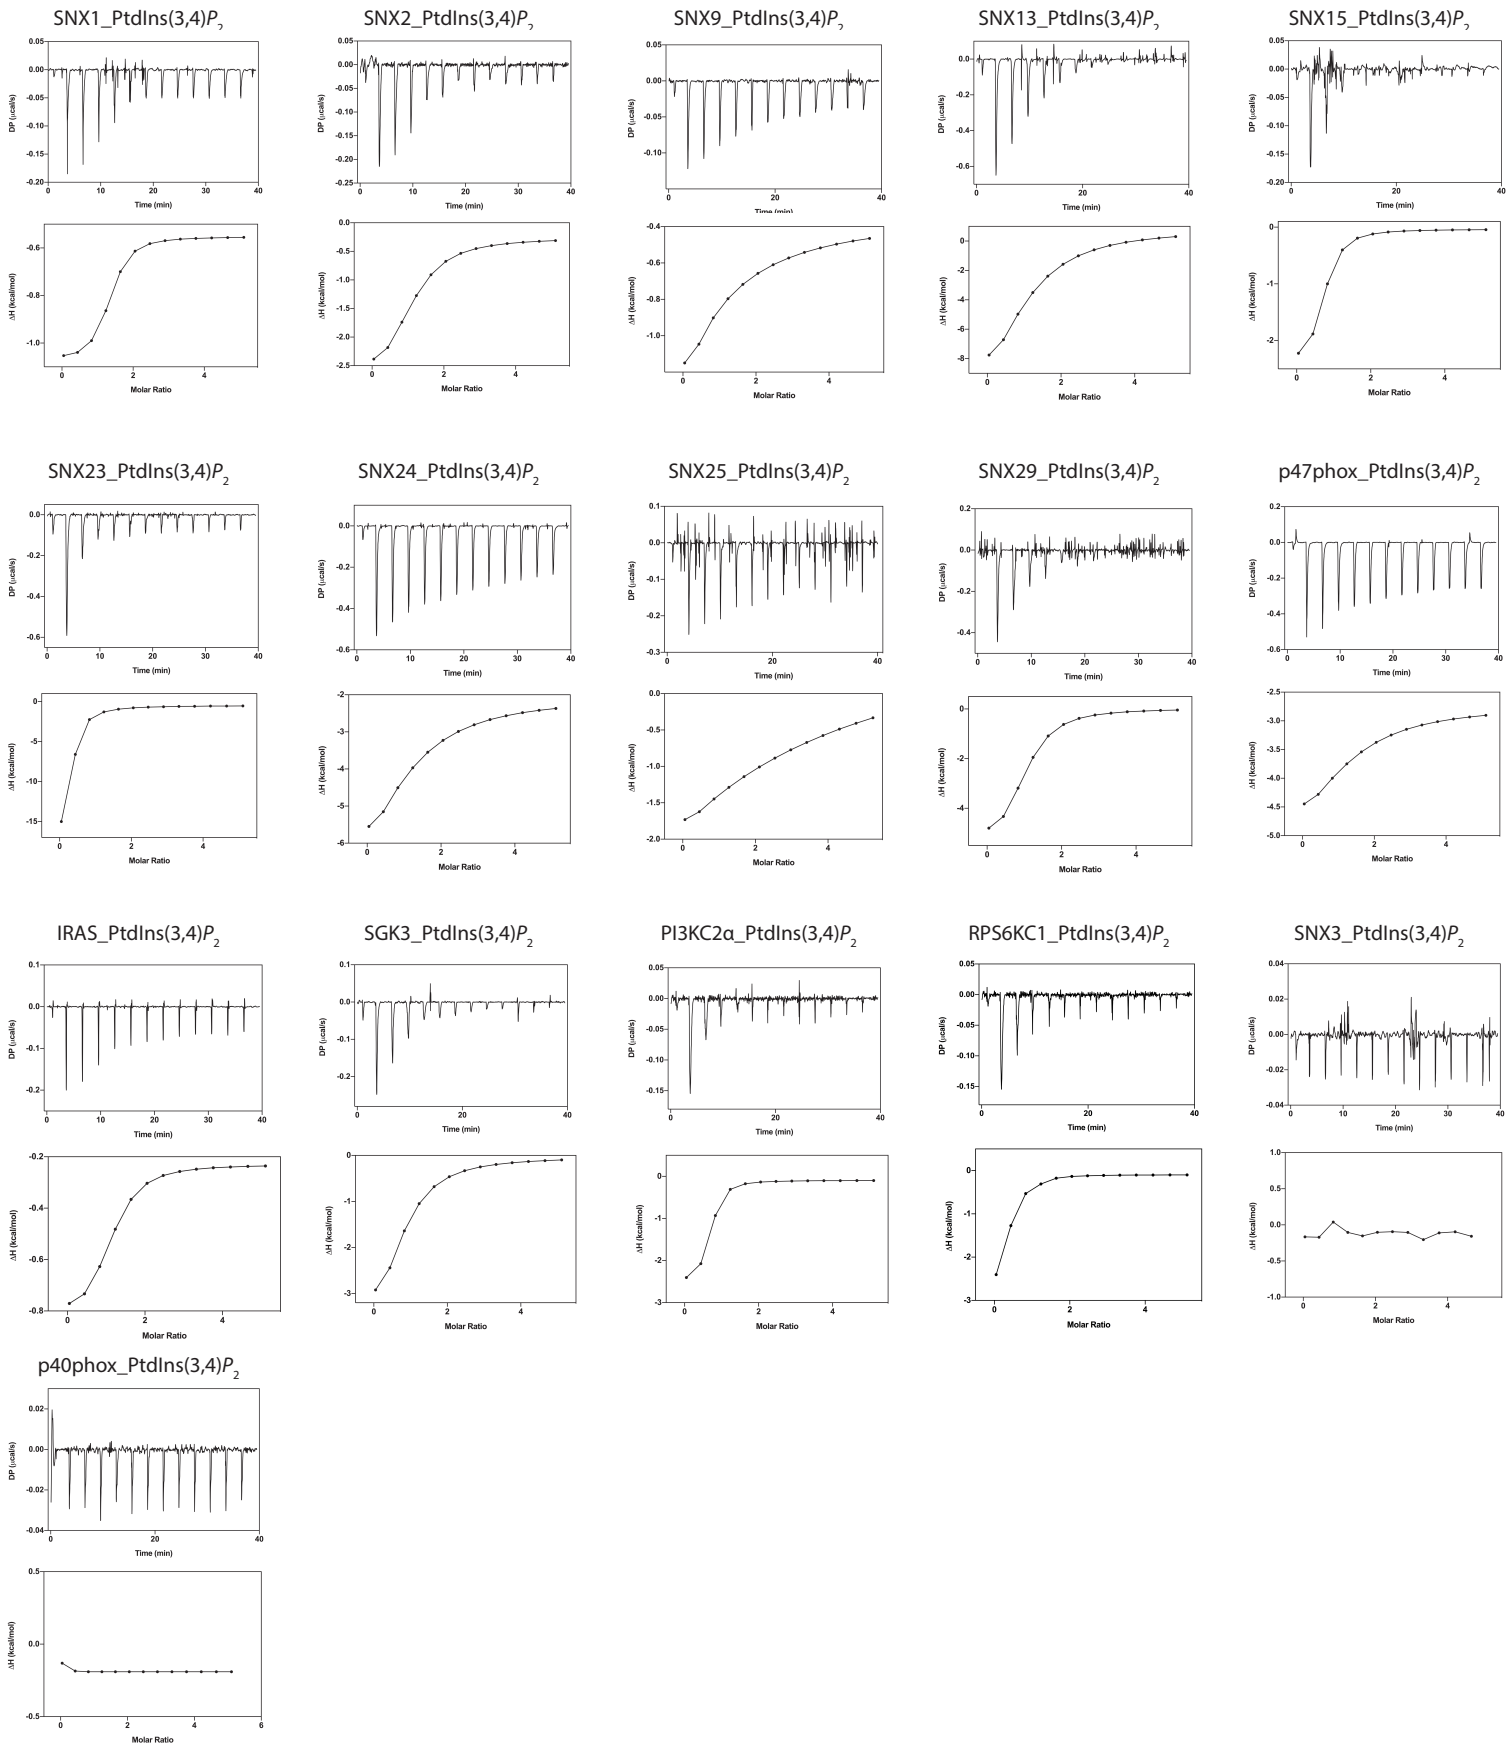

PtdIns(3,4)P<sub>2</sub>

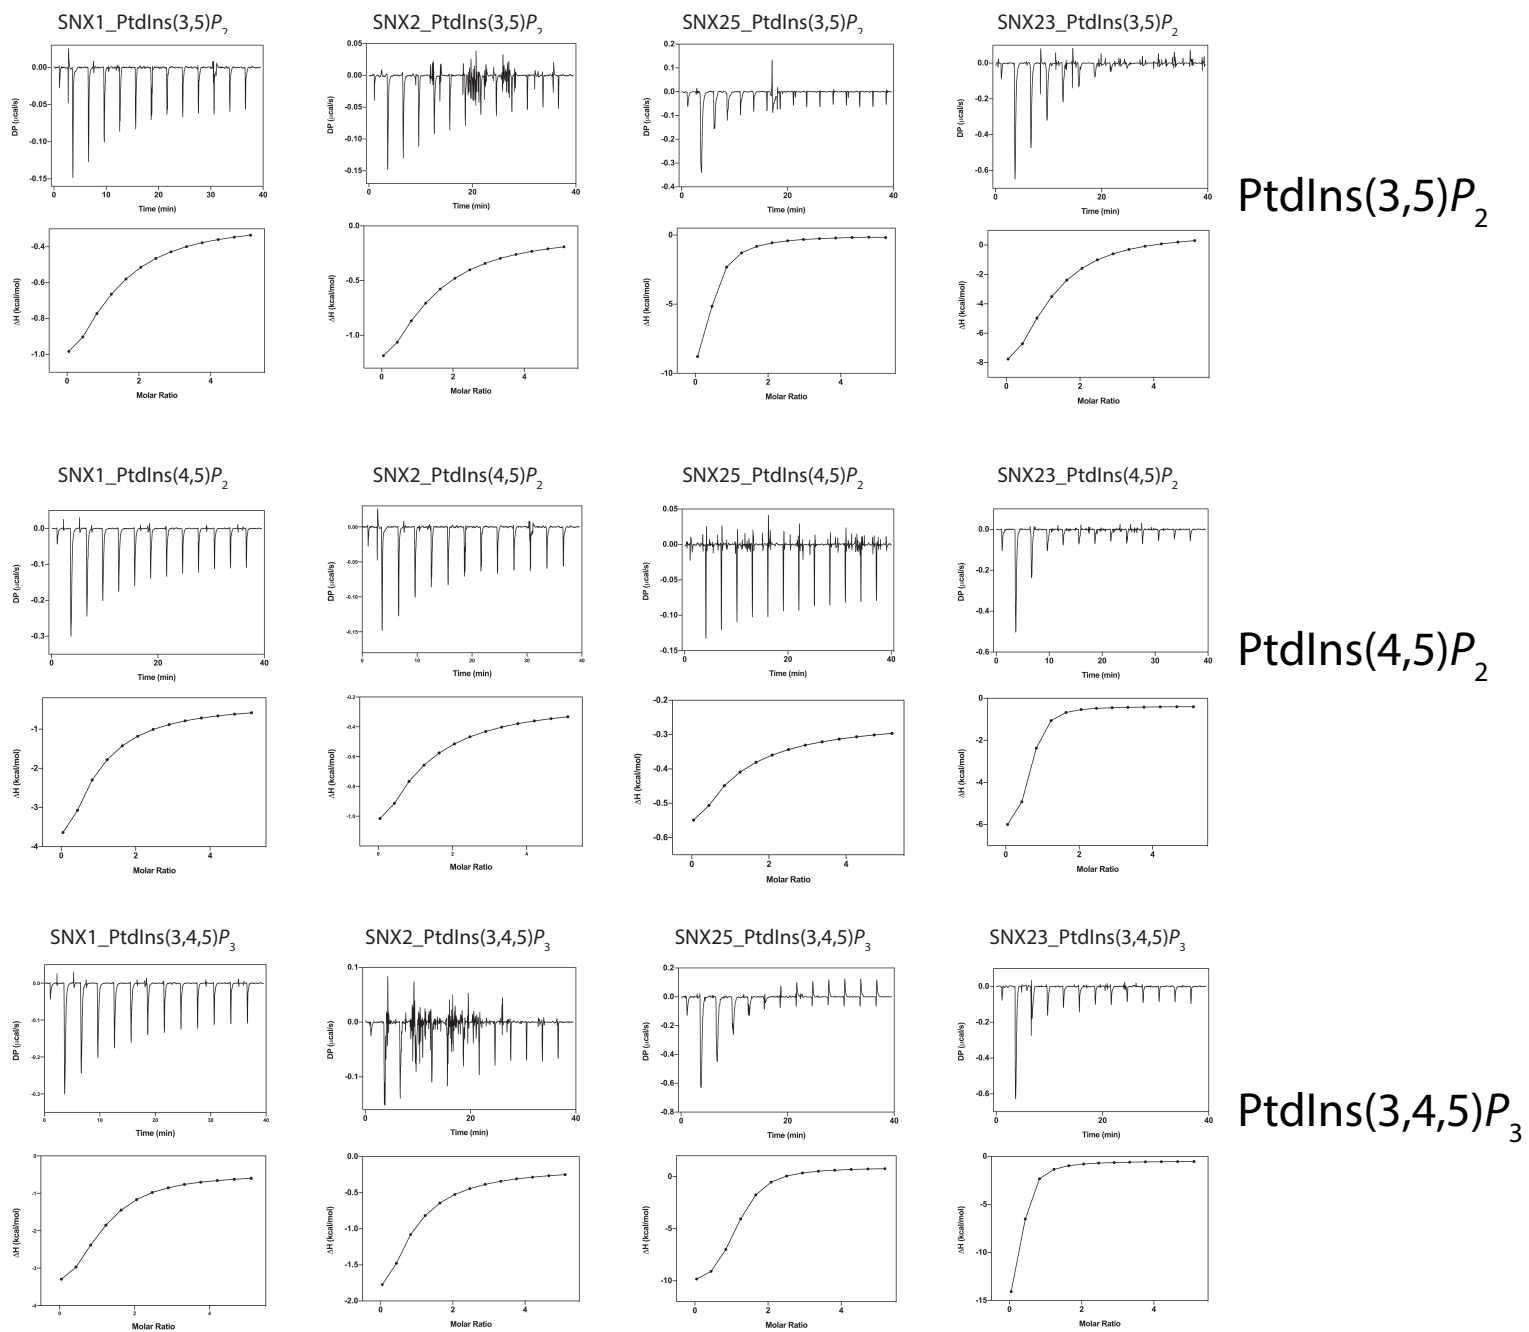

**Figure S2. PX domain binding to phosphoinositides measured by ITC.**

Binding of water-soluble phosphoinositide headgroup analogues (500  $\mu$ M) titrated into selected PX domain proteins (20  $\mu$ M) and measured by ITC. Top panels show the raw data and bottom panels represent the integrated and normalized data fit with a 1:1 binding model. The binding affinities ( $K_d$ ) are provided in Supplementary Table 1.

### SNX1

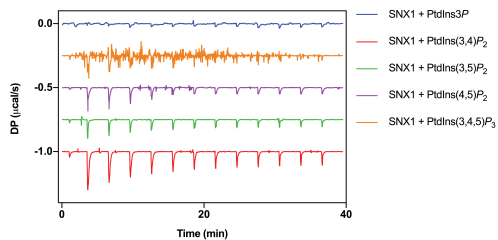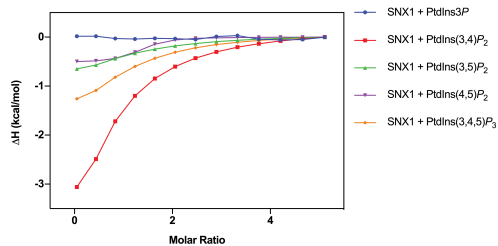

### SNX2

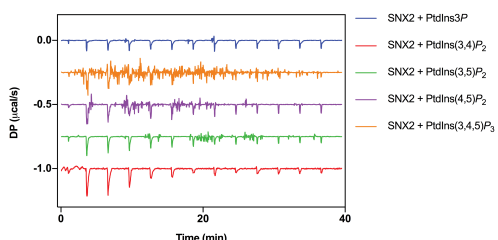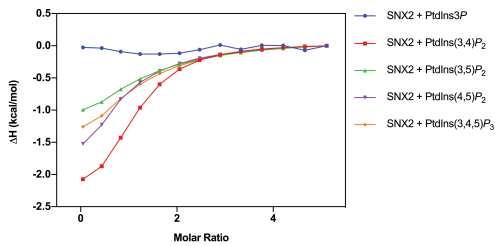

### SNX9

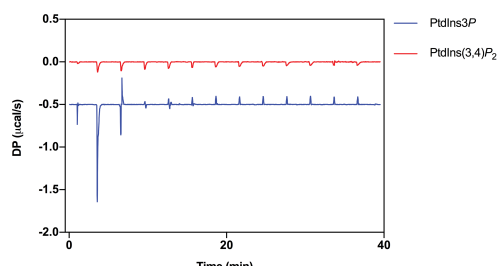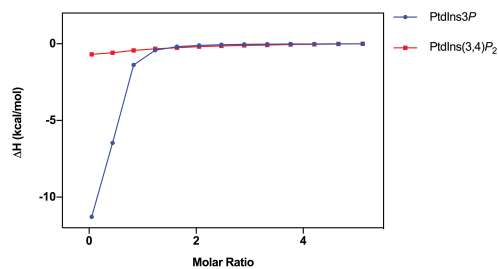

### SNX13

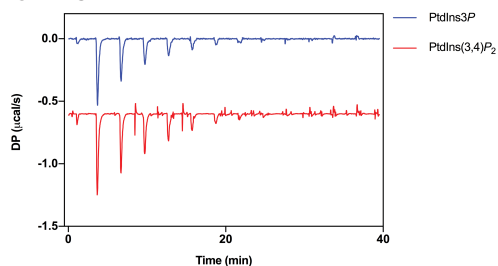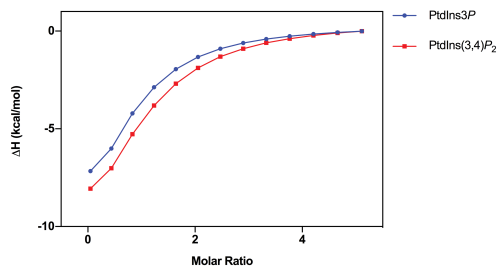

### SNX15

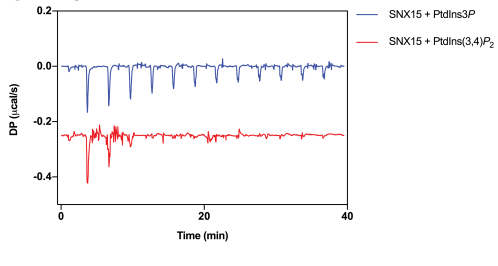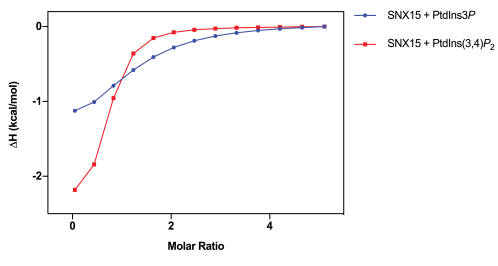

### SNX23

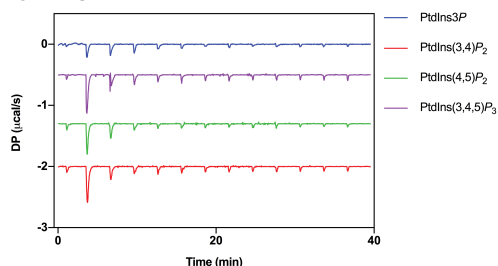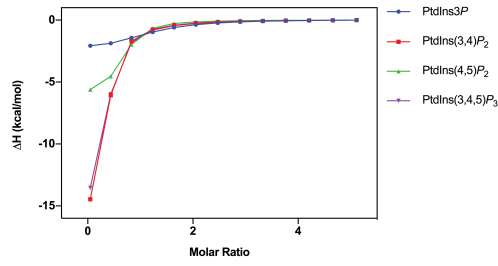

### SNX24

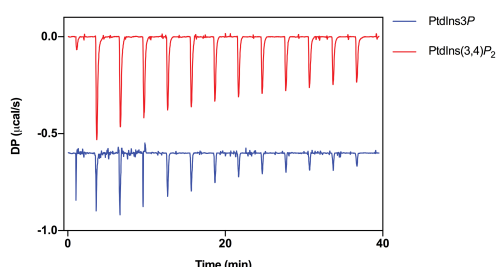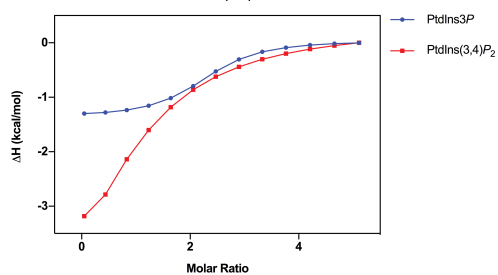

### SNX25

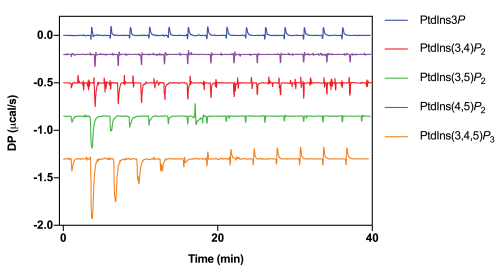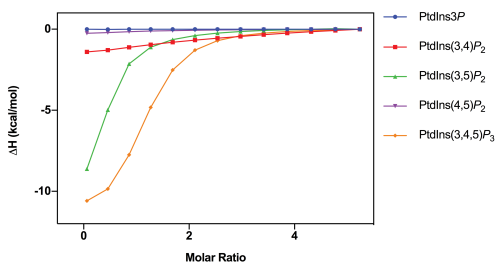

### SNX29

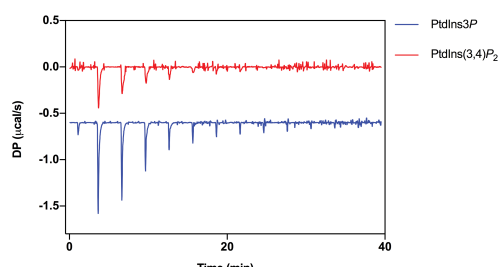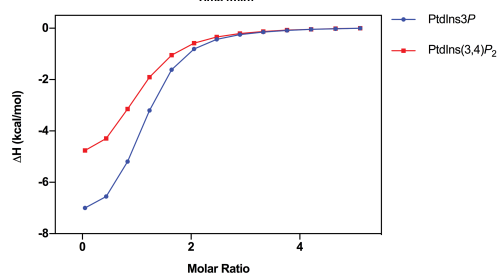

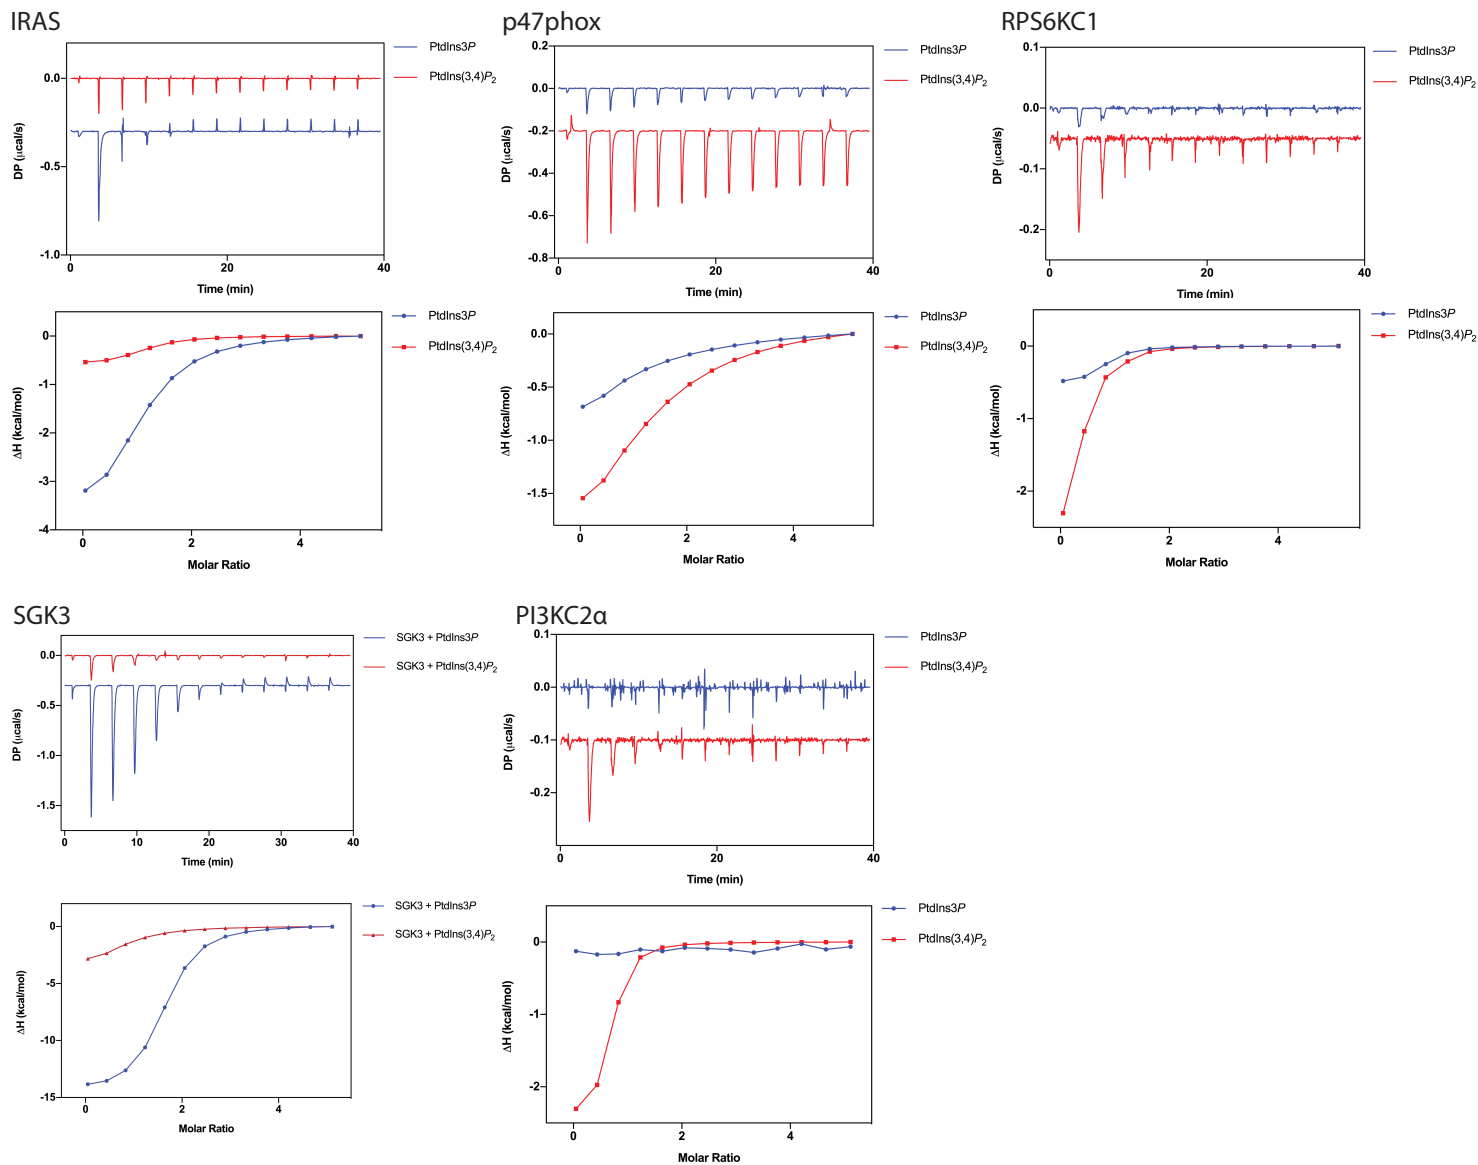

**Figure S3. Comparison of PX domain binding to different phosphoinositides measured by ITC.**

Binding of water-soluble phosphoinositide headgroup analogues (500  $\mu$ M) titrated into selected PX domain proteins (20  $\mu$ M) and measured by ITC. Top panels show the raw data and bottom panels represent the integrated and normalized data fit with a 1:1 binding model. The binding affinities (K<sub>d</sub>) are provided in Supplementary Table 1.

# PtdIns3P

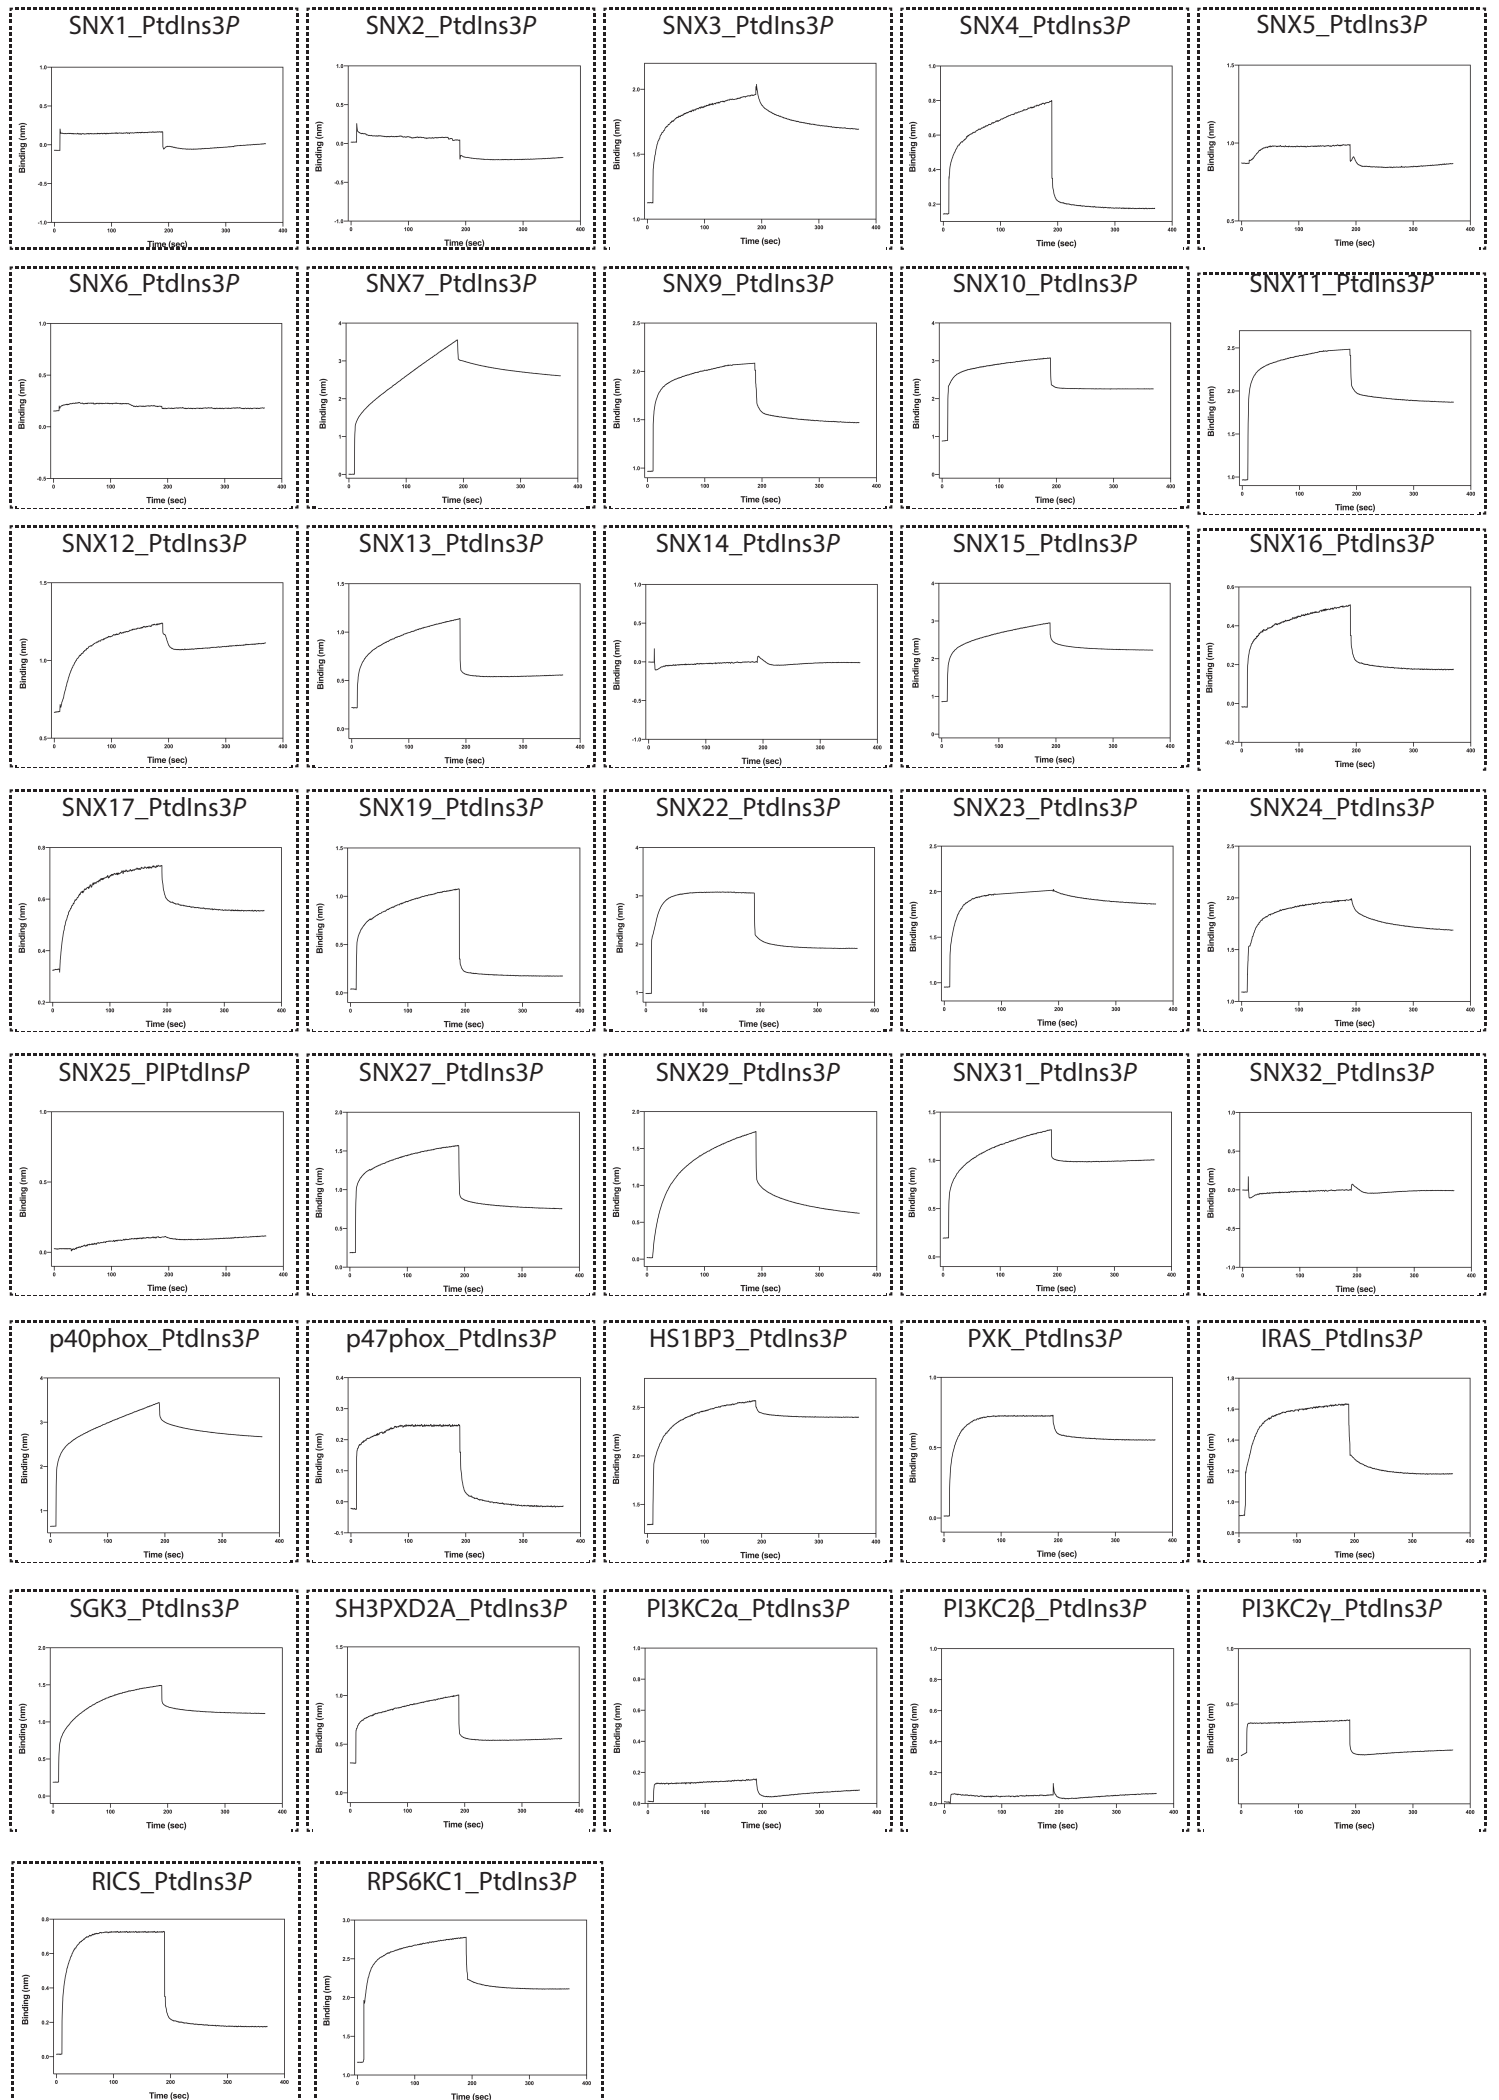



## PtdIns(4,5)P<sub>2</sub>

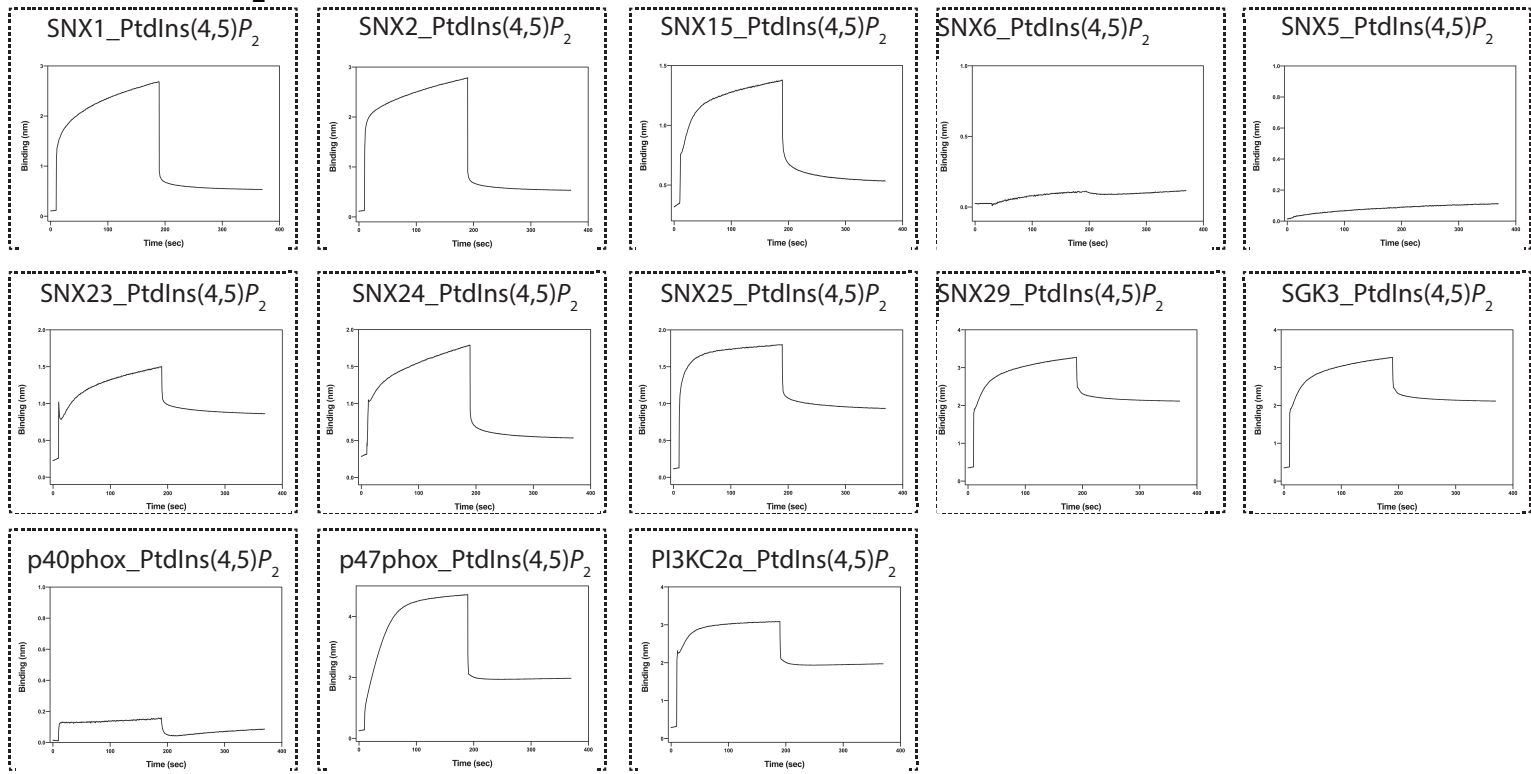

## PtdIns(3,4,5)P<sub>3</sub>

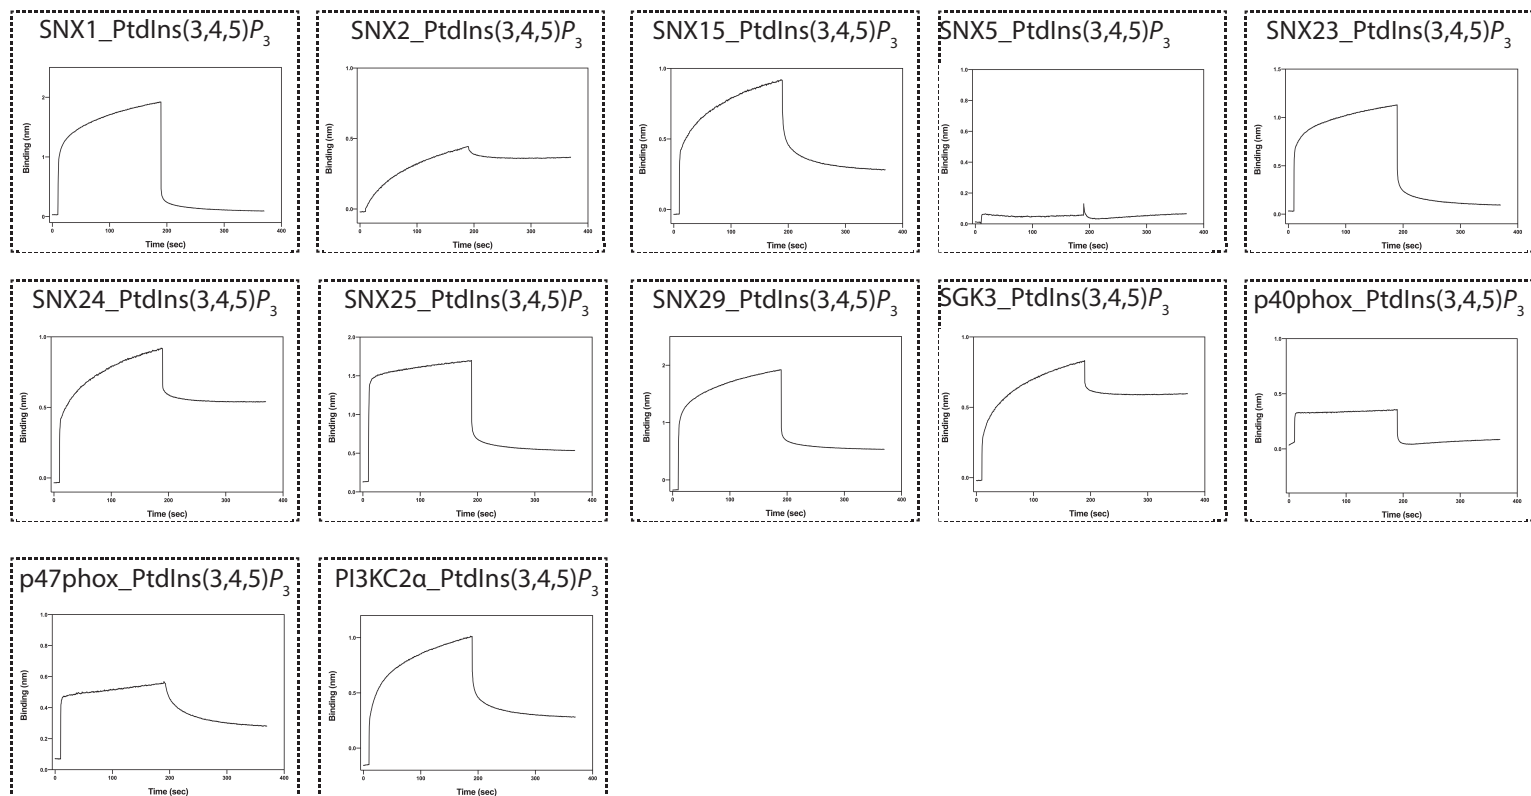

**Figure S4. PX domain binding to phosphoinositides measured by BLITZ.**

Biotinylated PC/PE liposomes containing the indicated phosphoinositides were coupled to a streptavidin probe and binding to PX proteins measured at a single concentration of 20 nM using the BLITZ system. Binding kinetics were calculated using Prism software and are provided in Supplementary Table 2.

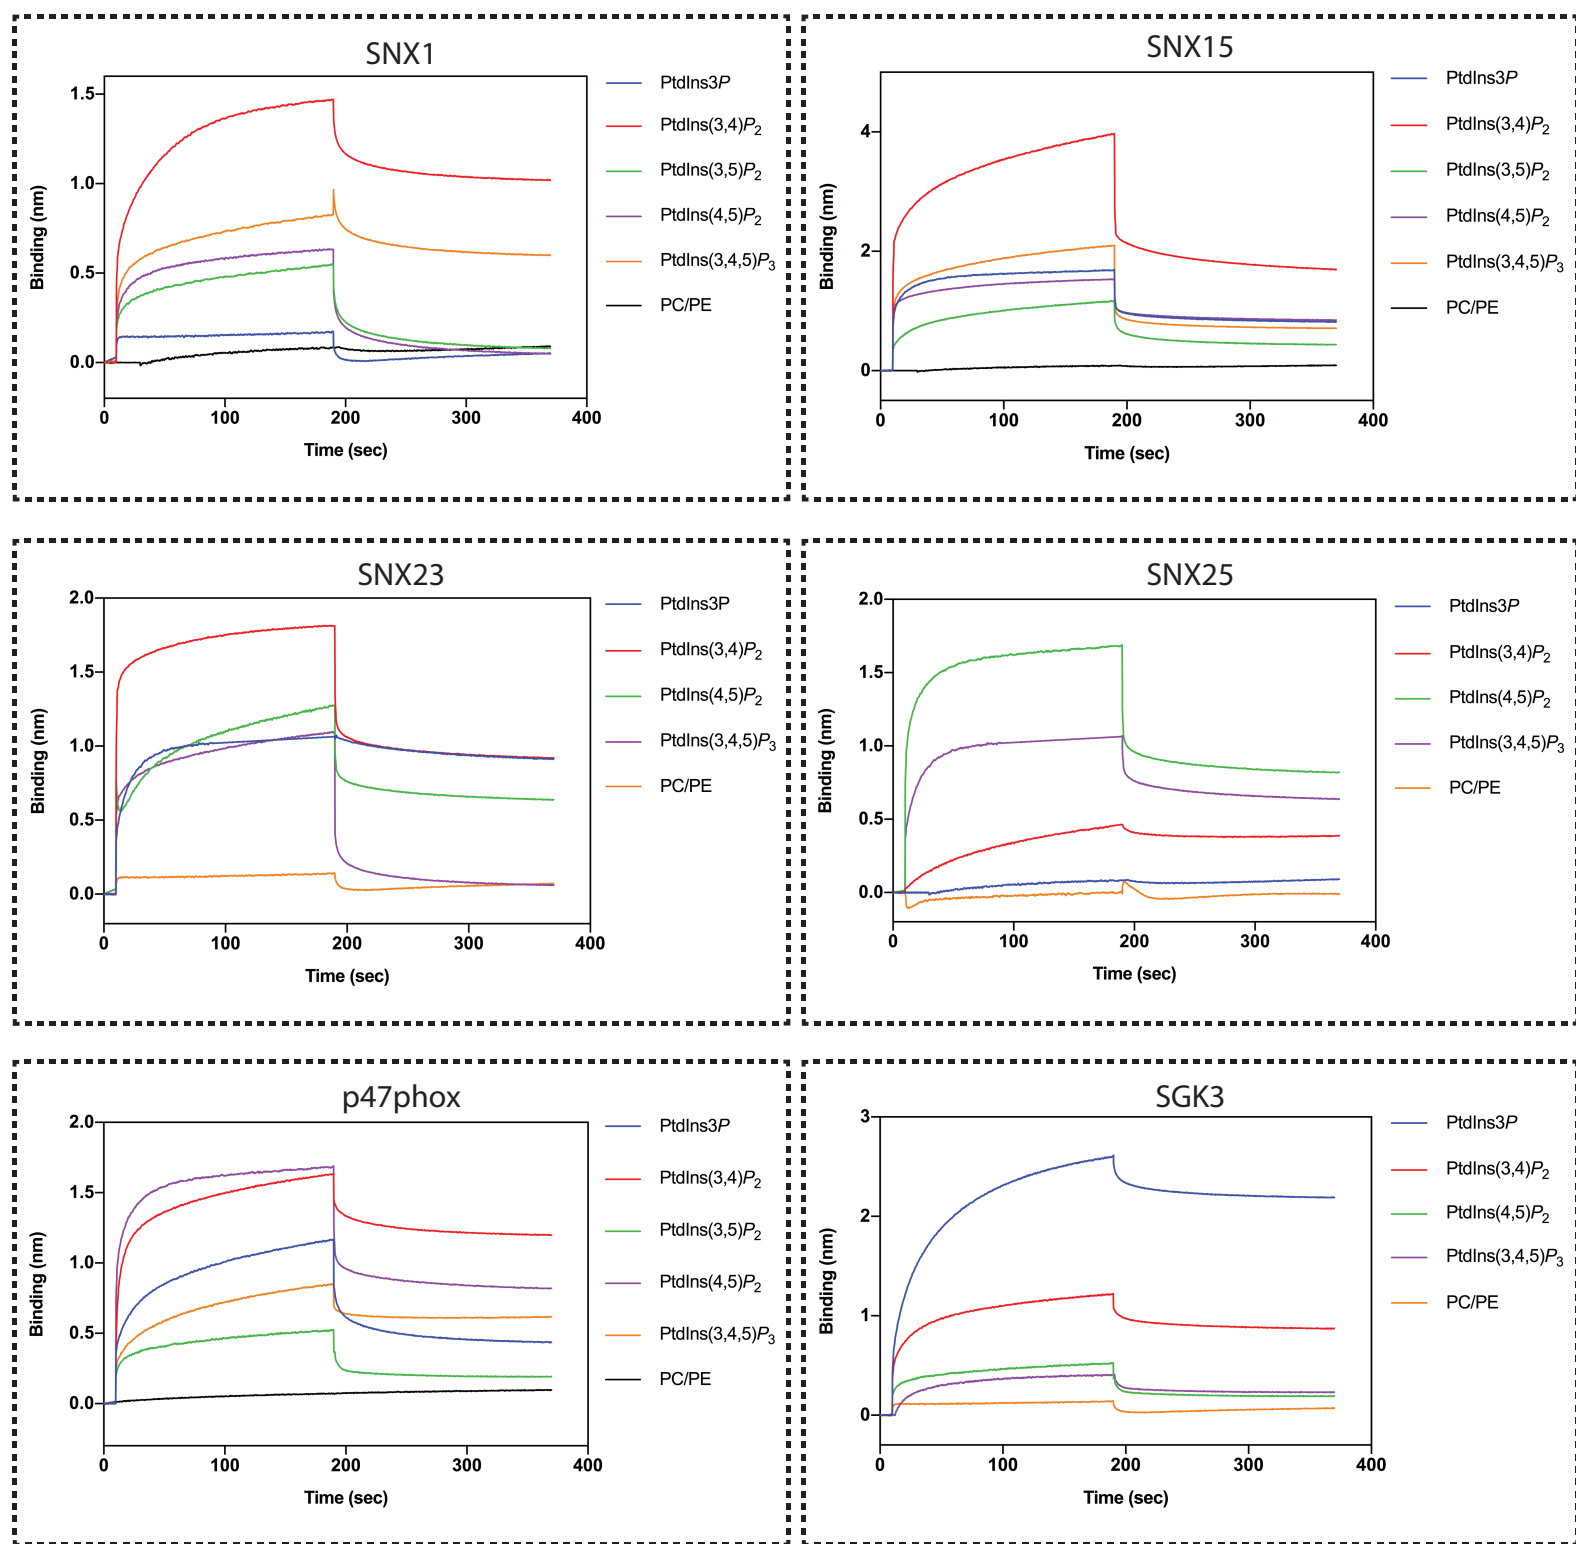

**Figure S5. Comparison of PX domain binding to different phosphoinositides measured by BLITZ.**

Biotinylated PC/PE liposomes containing the indicated phosphoinositides were coupled to a streptavidin probe and binding to PX proteins measured at a single concentration of 20 nM using the BLITZ system. Binding kinetics were calculated using Prism software and are provided in Supplementary Table 2.

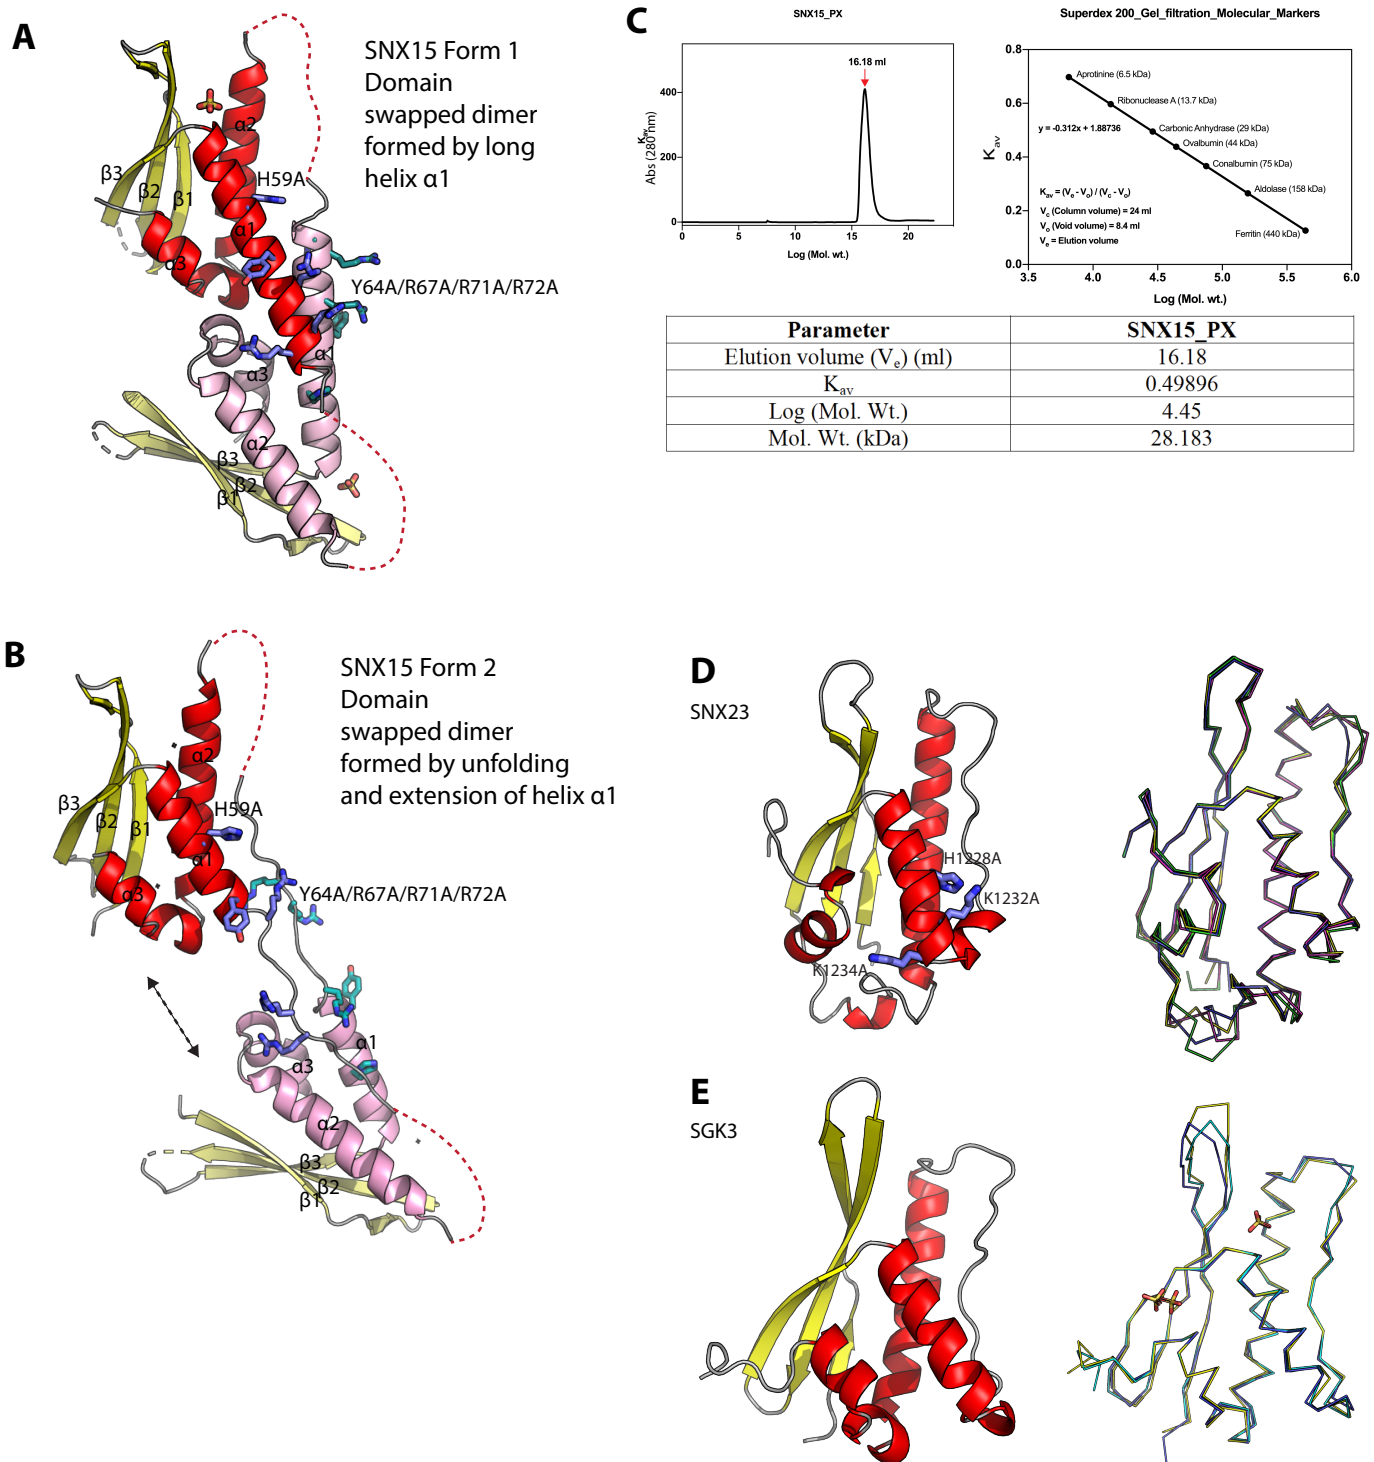

**Figure S6. Crystal structures of the SNX15, SNX23, SGK3, and SNX32 PX domains.**

(A) Cartoon representation of the PX domain of SNX15 bound to sulphate (crystal form 1). The protein forms a domain-swapped dimer, whereby the  $\alpha 1$  helix is longer than normal leading to swapping of the subsequent  $\alpha 2$  and  $\alpha 3$  with an adjacent molecule in the crystal lattice. (B) Cartoon representation of the PX domain of SNX15 (crystal form 2). The protein still forms a domain-swapped dimer, but the C-terminus of the  $\alpha 1$  helix unfolds to form a longer extended structure. (C) Analytical gel filtration profile of the SNX15 PX domain (compared with the standard calibration curve). The solid line represents the normalized UV absorbance at 280 nm. The chromatogram peak represents the corresponding measured molecular weight in kDa. (D) (Left) Cartoon representation of the SNX23/Kif16B PX domain. (Right) Overlay of the three SNX23 chains within the asymmetric unit with the previous SNX23 PX domain structure in complex with sulphate (PDB ID 2V14). (E) (Left) Cartoon representation of the SGK3 PX domain. (Right) Overlay of the SGK3 structure with the two chains of the asymmetric unit within the previous SGK3 PX domain structure (PDB ID 1XTN).

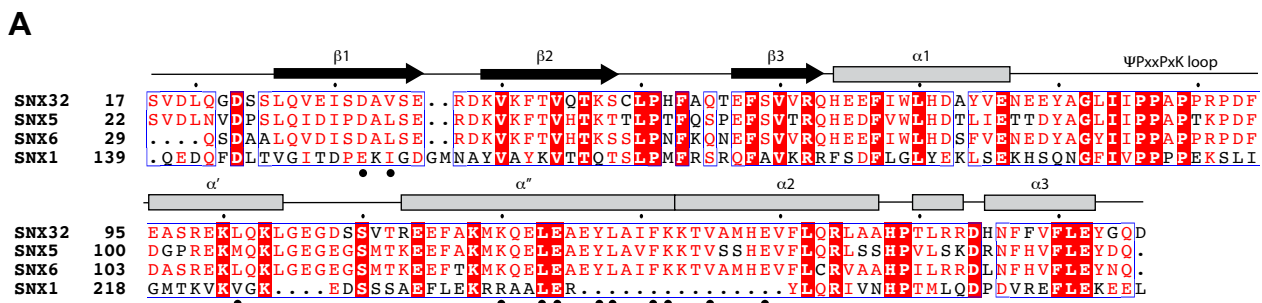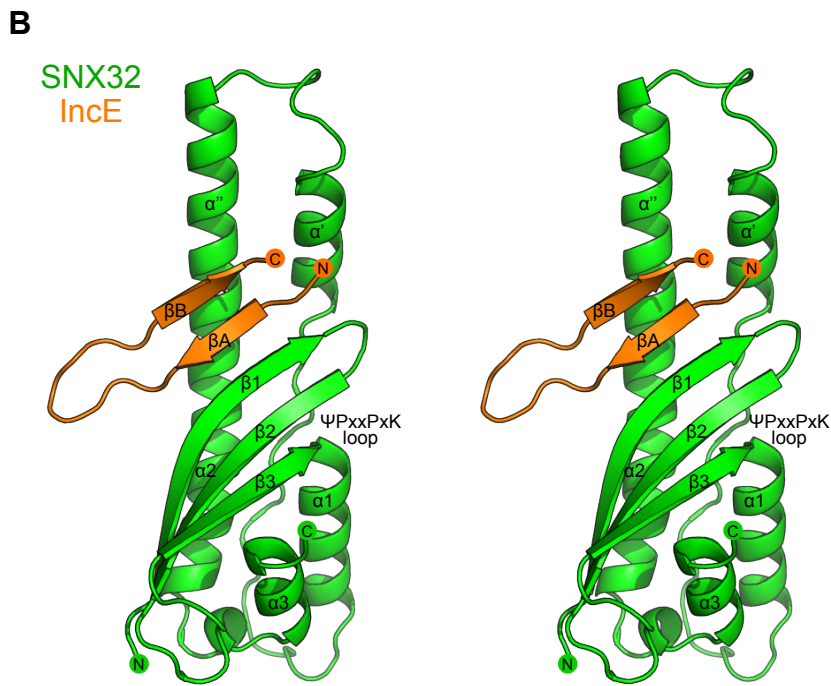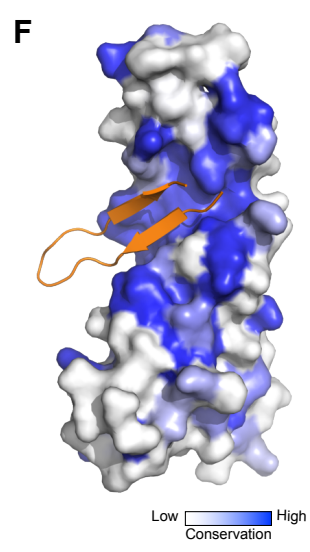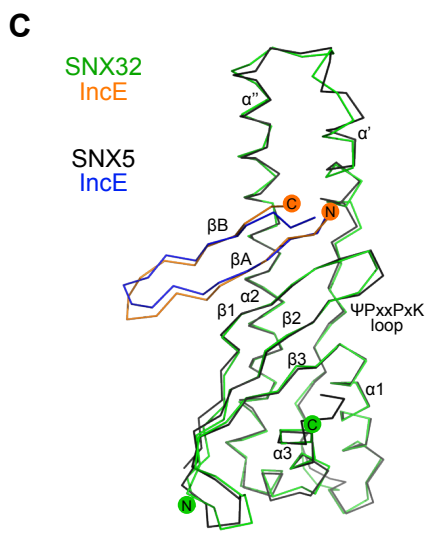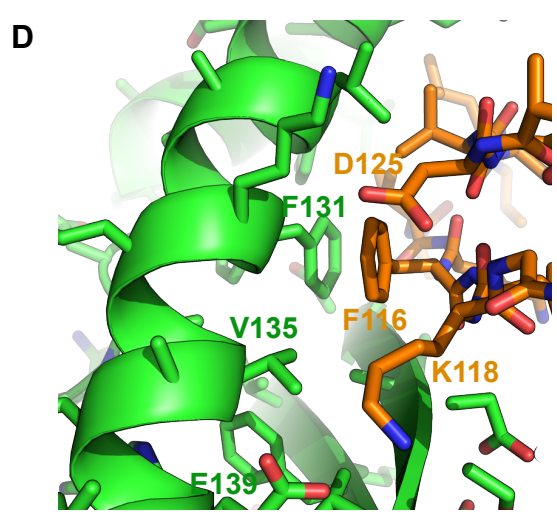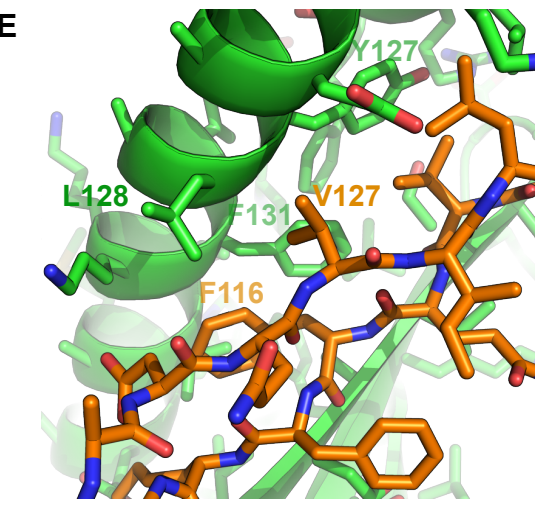

**Figure S7. Sequence and crystal structure of the SNX32 PX domain in complex with IncE.**

(A) Sequence alignment of human SNX32, SNX5, SNX6 and SNX1 PX domains. Conserved residues are indicated in red. Side-chains that directly interact with IncE in the crystal structure are indicated with black circles. Alignment was made with ESPRIPT [20]. (B) Cartoon diagram (shown in wall-eye stereo) showing the crystal structure of the human SNX32 PX domain (green) in complex with IncE (residues 108-132) (orange). All structure images were generated using PyMOL (Delano Scientific). The extended helix-turn-helix structure composed of helices ' and " extends towards to the top of the image. (C) Superposition of the crystal structure of the SNX32 PX domain complex with IncE (green and orange) with that of the previous SNX5-IncE structure (black and blue) (PDB ID 5TGI) [10]. Structures are shown in backbone ribbon representation. (D and E) Two close up views of the SNX32-IncE interface highlighting the important interactions between the two proteins. (F) The relative sequence conservation of SNX32 side-chains are plotted on the surface representation from blue (highly conserved) to white (not conserved). The IncE peptide is shown in orange cartoon representation. The conservation was calculated using CONSURF [21].

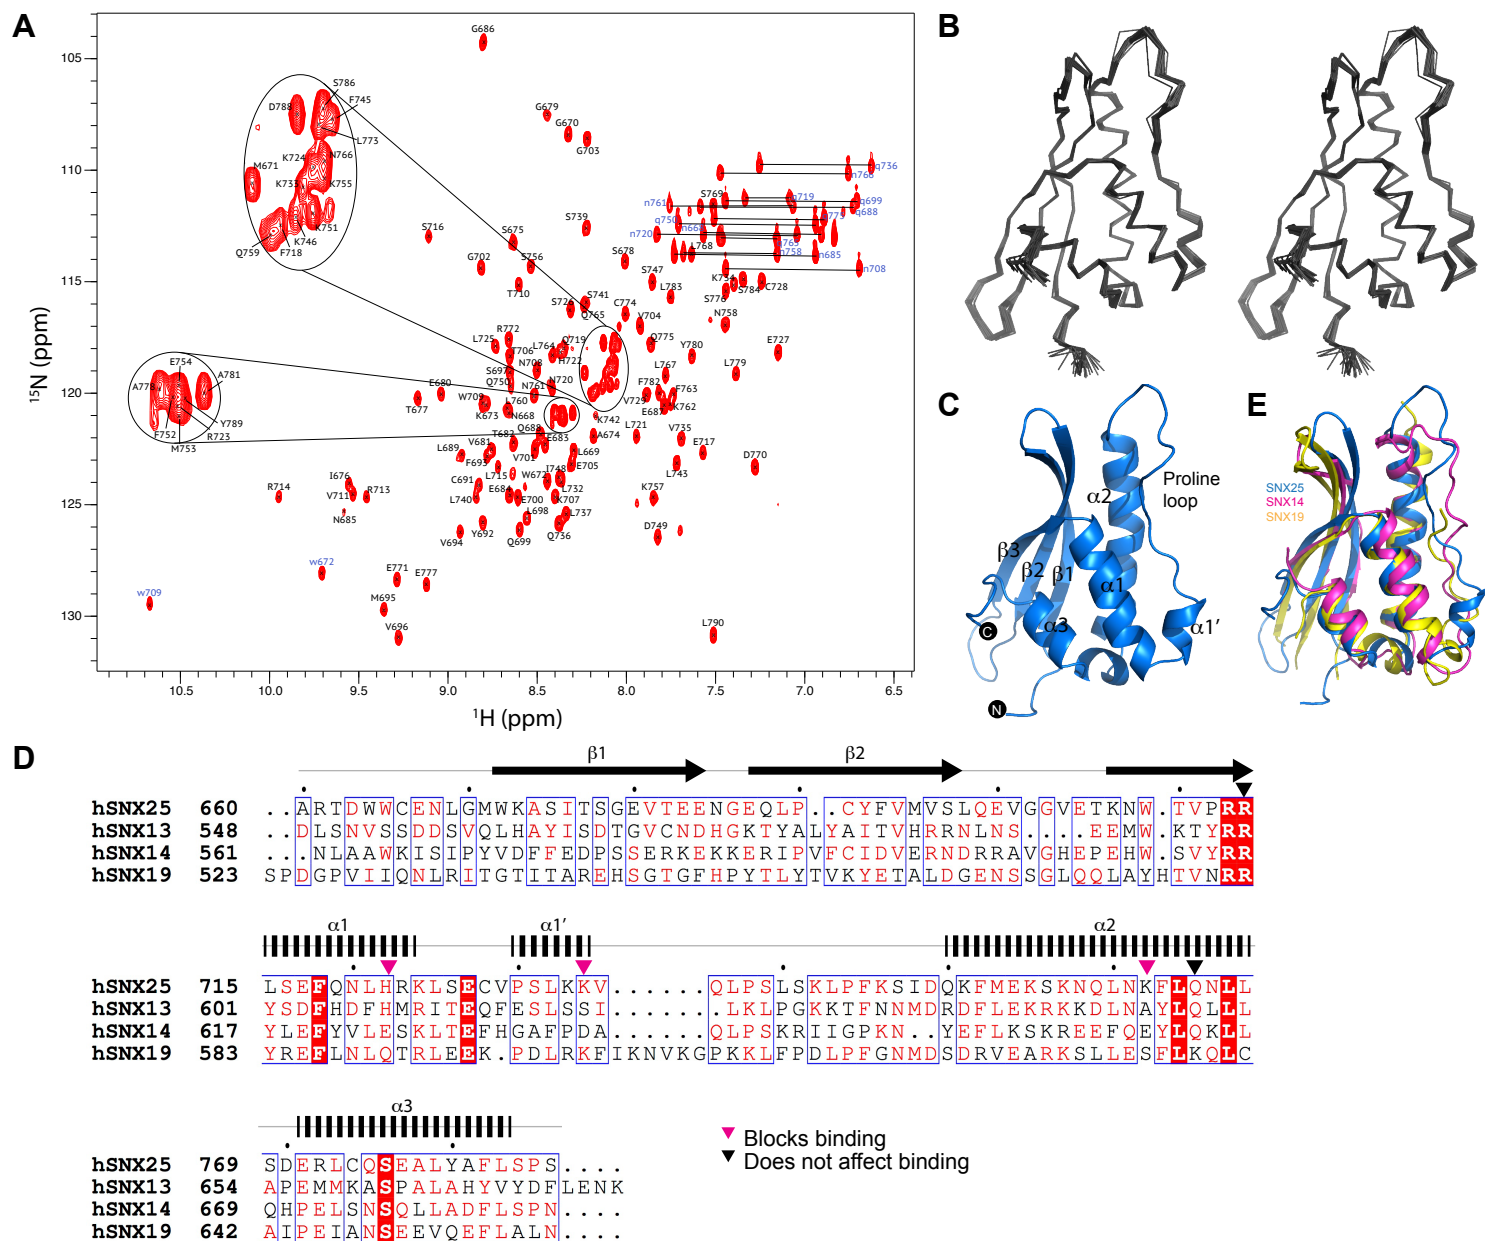

**Figure S8. NMR structure of the SNX25 PX domain.**

(A) 2D  $^1\text{H}$ - $^{15}\text{N}$ -HSQC spectra of the SNX25 PX domain at 500 M with sequence-specific assignments shown. (B) The 20 lowest energy NMR structures calculated for the SNX25 PX domain, shown in wall-eye stereo. (C) Solution NMR structure of the SNX25 PX domain in ribbon diagram. (D) Sequence alignment of the SNX25 PX domain with the other human RGS-PX family members. Secondary structure is indicated based on the SNX25 NMR structure. (E) Structural overlay of the SNX25 PX domain NMR structure with the SNX14 and SNX19 PX domains determined by X-ray crystallography (PDB IDs 4P2J and 4PQO respectively) (Mas et al., 2014).

|               |          | Canonical |   |   |   |
|---------------|----------|-----------|---|---|---|
|               |          | R         | Y | K | R |
| PX-BAR        | SNX1     | R         | F | K | R |
|               | SNX2     | R         | F | K | R |
|               | SNX4     | R         | Y | K | R |
|               | SNX5     | Q         | H | K | T |
|               | SNX6     | Q         | H | R | T |
|               | SNX7     | R         | Y | K | R |
|               | SNX8     | R         | Y | K | R |
|               | SNX30    | R         | Y | K | R |
|               | SNX32    | Q         | H | R | T |
| SH3-PX-BAR    | SNX9     | R         | Y | K | R |
|               | SNX18    | R         | Y | K | R |
|               | SNX33    | R         | Y | K | R |
| RGS-PX        | SNX13    | R         | Y | K | R |
|               | SNX14    | R         | Y | K | K |
|               | SNX19    | R         | Y | K | R |
|               | SNX25    | R         | L | K | K |
| PX-FERM       | SNX17    | R         | Y | K | R |
|               | SNX27    | R         | Y | K | R |
|               | SNX31    | R         | Y | K | R |
| PX-only       | SNX3     | R         | Y | K | K |
|               | SNX10    | R         | Y | K | R |
|               | SNX11    | R         | Y | K | R |
|               | SNX12    | R         | Y | K | R |
|               | SNX22    | R         | Y | K | R |
|               | SNX24    | R         | Y | K | R |
|               | HS1BP3   | K         | Y | K | K |
| PX-SH3        | SH3PXD2A | R         | Y | K | R |
|               | SH3PXD2B | R         | Y | K | R |
|               | SNX28    | S         | W | L | R |
|               | p40phox  | R         | Y | K | R |
|               | p47phox  | R         | F | P | R |
| PX-S/T kinase | PXK      | R         | Y | K | R |
|               | RPS6KC1  | R         | Y | K | R |
|               | SGK3     | R         | Y | K | R |
| PX-SH3-GAP    | SNX26    | S         | Y | P | V |
|               | PX-RICS  | S         | Y | R | V |
| PX-PI3-kinase | PIK3C2A  | T         | F | R | R |
|               | PIK3C2B  | T         | F | R | R |
|               | PIK3C2G  | S         | F | H | R |
| PX-PH-PLD     | PLD1     | K         | F | R | R |
|               | PLD2     | K         | Y | R | K |
| PX-PXB        | SNX20    | R         | Y | K | R |
|               | SNX21    | R         | Y | K | R |
| Kinesin-PX    | SNX23    | R         | Y | K | R |
| PX-MIT        | SNX15    | R         | Y | R | R |
| PX-LRR-IRAS   | IRAS     | R         | Y | K | R |
| PX-SNX16      | SNX16    | R         | Y | K | Q |
| SNX29-PX      | SNX29    | R         | Y | K | R |
| PX-SNX34      | SNX34    | R         | S | R | R |

  

| Non-Canonical |          |       |
|---------------|----------|-------|
| H / Y         | K/R      | Group |
| Y             | KK       | III   |
| H             | KK       | III   |
| R             |          | I     |
| H             |          | I     |
| H             |          | I     |
| K             | K        | II    |
| Q             | KR       | ii    |
| R             | K        | ii    |
| H             |          | I     |
| Y             | RK       | IV    |
| Y             | RK       | iv    |
| Y             | RK       | iv    |
| H             | R        | IV    |
| E             | K        | I     |
| Q             | RKRKK    | II    |
| H             | RKKK     | III   |
| H             | RK       | II    |
| H             | RK       | II    |
| N             | RR       | II    |
| R             | RK       | II    |
| R             | R        | II    |
| R             | KR       | IV    |
| K             | RK       | II    |
| H             | KRKKK    | IV    |
| H             | KKK      | IV    |
| Y             | KR       | IV    |
| Q             | KKKR     | II    |
| Q             | KKKR     | ii    |
| Q             | KKRR     | I     |
| Q             | KRK      | II    |
| H             | KKR      | IV    |
| N             |          | II    |
| H             | KKR      | IV    |
| Y             | KK       | IV    |
| D             | RRR      | I     |
| D             | KRR      | IV    |
| H             | KK       | III   |
| H             | KR       | III   |
| H             | K        | III   |
| H             | RKKRRRRR | iii   |
| H             | RRKRRR   | iii   |
| Q             | KKR      | iv    |
| H             | RRR      | iv    |
| H             | KKK      | IV    |
| H             | RRR      | IV    |
| H             | KRKK     | IV    |
| N             | KK       | II    |
| H             | KKR      | IV    |
| W             | RR       | i     |

**Figure S9. Conservation of canonical and secondary site amino-acid sequences needed for phosphoinositide binding.** Black and grey indicates non-conservative and conservative substitutions respectively. The phosphoinositide-binding group is indicated in the last column, and lower case grey letters indicate predictions of the phosphoinositide-binding preference based on the sequences of the proteins.

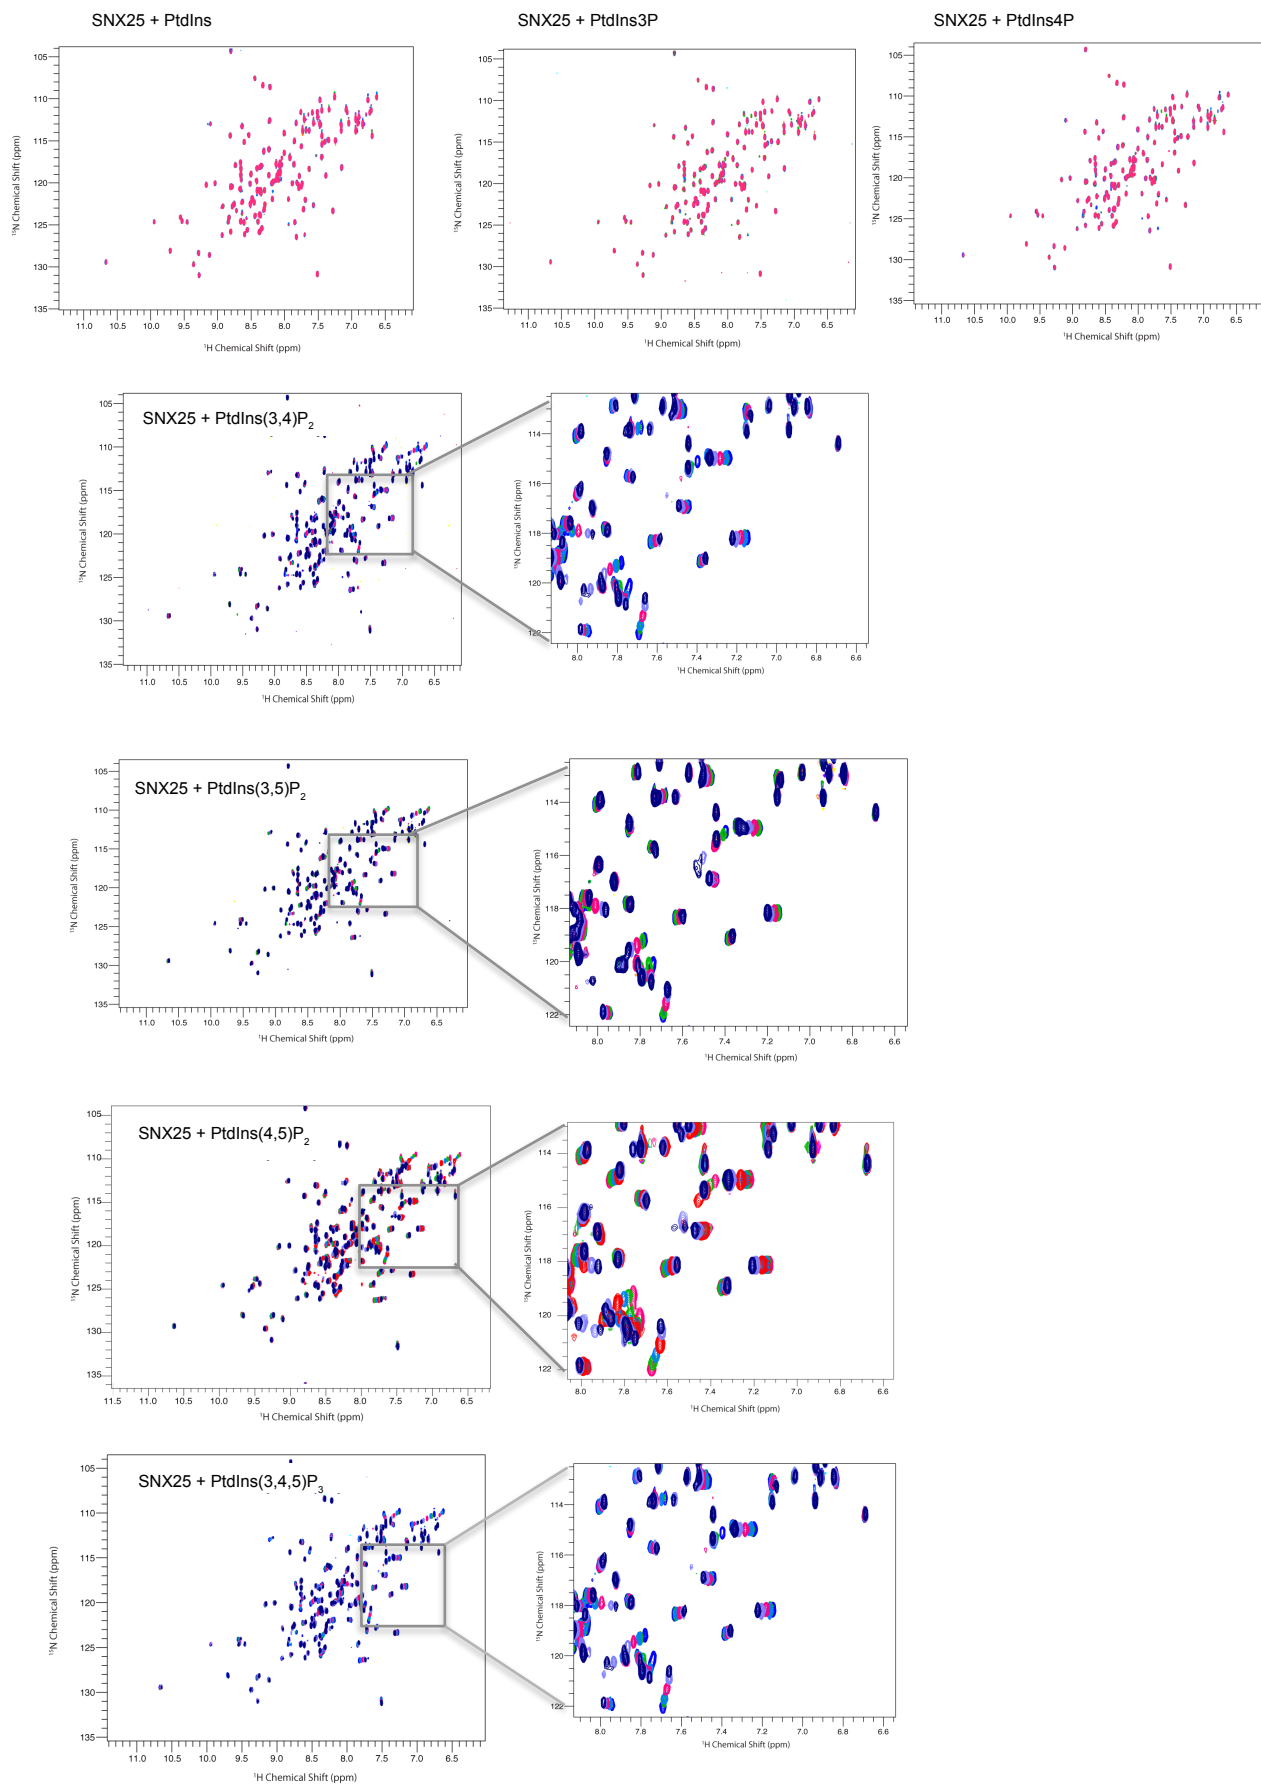

**Figure S10. Binding of SNX25 to phosphoinositides by NMR.**

2D  $^1\text{H}$ - $^{15}\text{N}$ -HSQC spectra of the SNX25 PX domain at 50  $\mu\text{M}$  were recorded in the presence of increasing molar ratios of the indicated di-C8 soluble phosphoinositide species. PtdIns and mono-phosphorylated PtdIns3P and PtdIns4P did not show significant binding. Di and tri-phosphorylated species however resulted in significant chemical shift perturbations.

### SNX1 and its non-canonical mutant

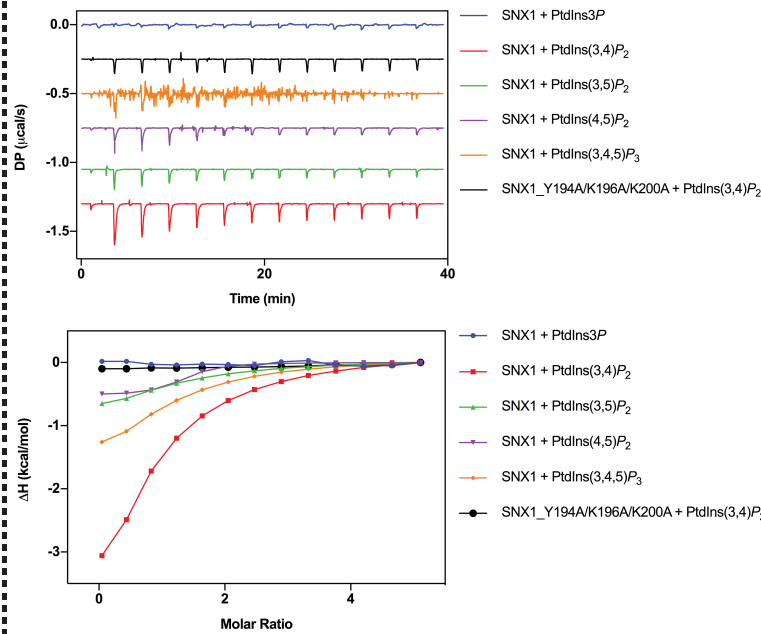

### SNX2 and its non-canonical mutant

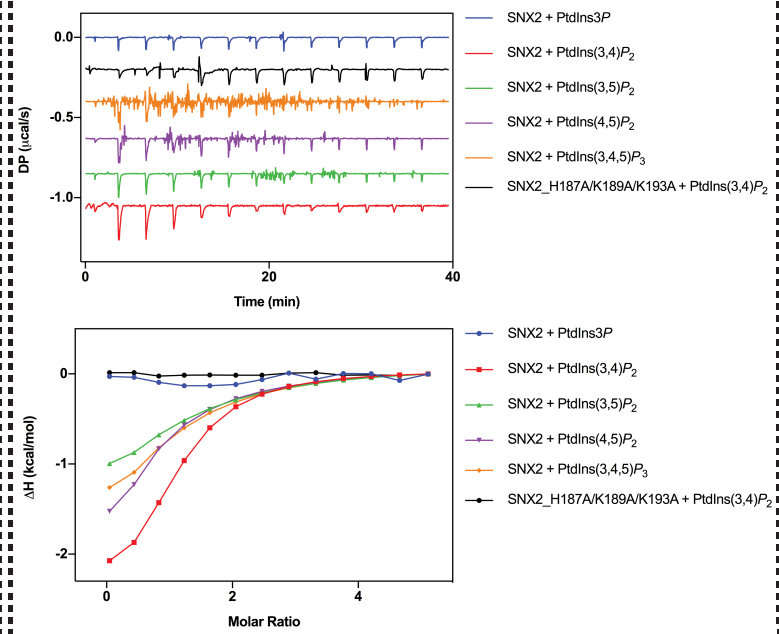

### SNX9 and its non-canonical mutant

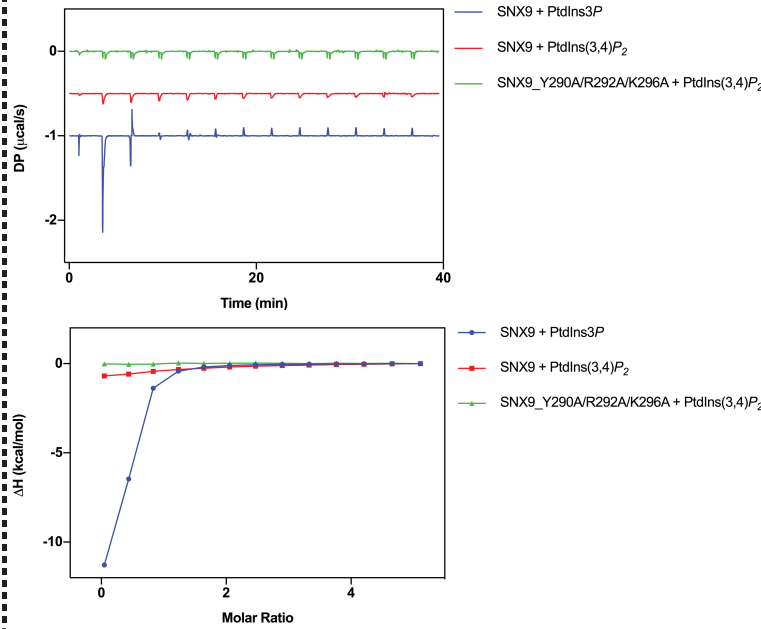

### SNX15 and its non-canonical mutant

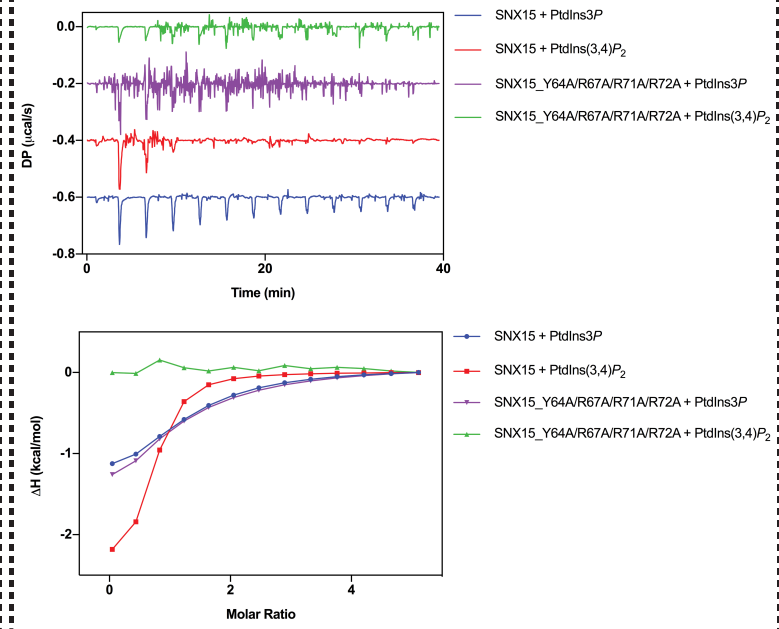

### SNX23 and its non-canonical mutant

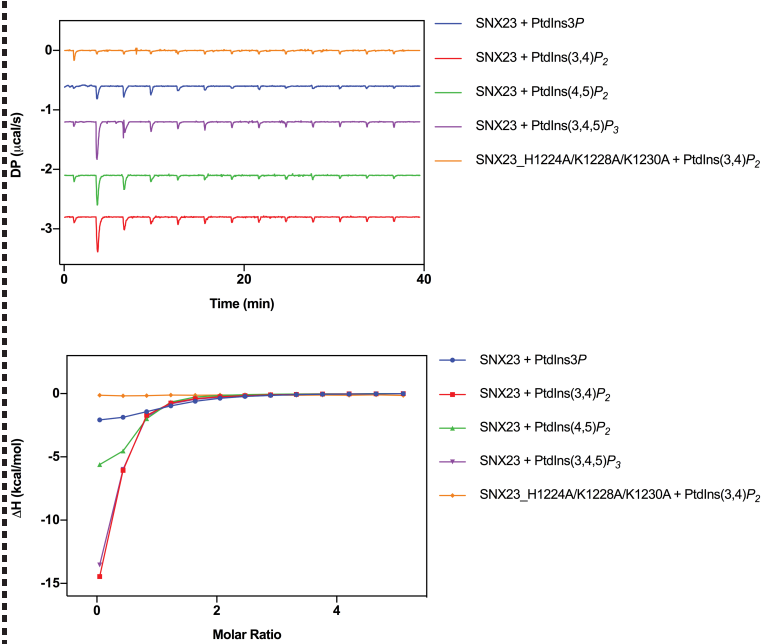

### SNX25 and its non-canonical mutant

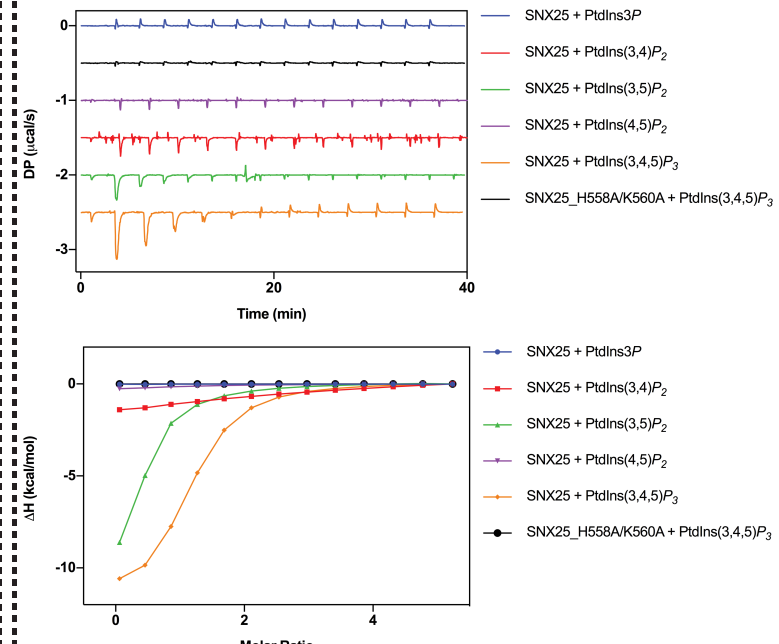

### SNX29 and its non-canonical mutant

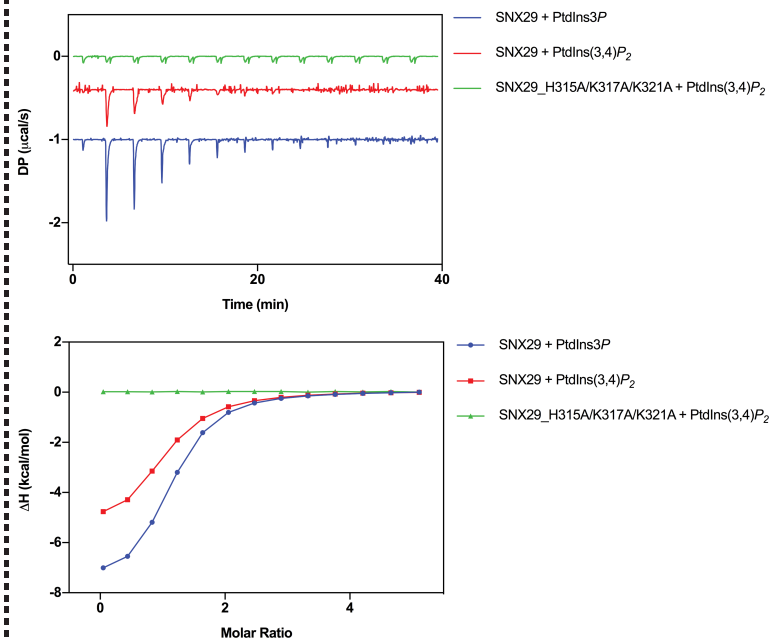

### p47phox and its non-canonical mutant

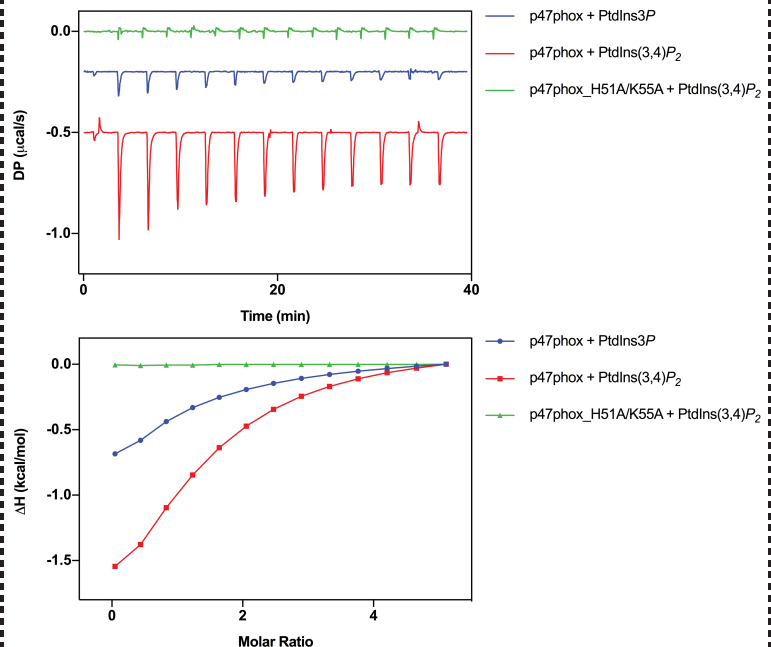

### SGK3 and its non-canonical mutant

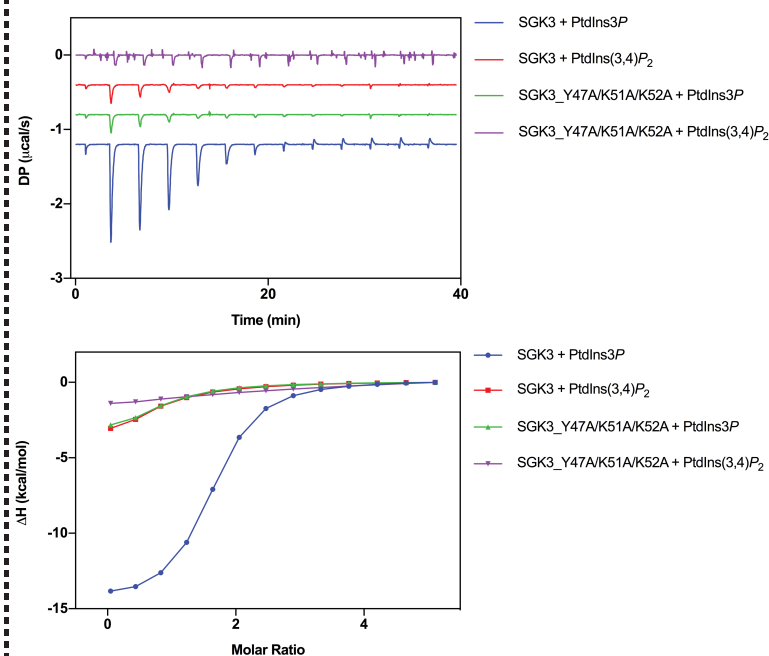

### PI3KC2 $\alpha$ and its non-canonical mutant

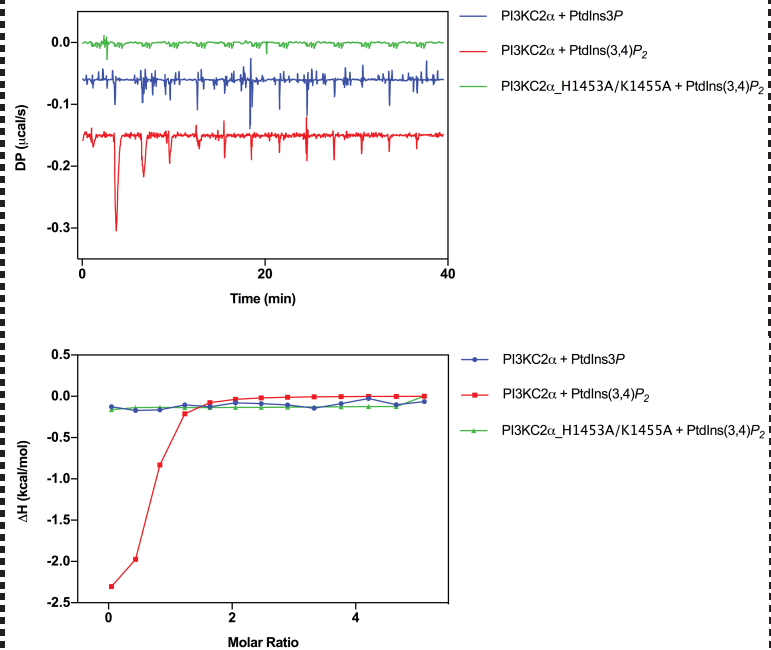

**Figure S11. PX domain mutants binding to phosphoinositides measured by ITC.**

Binding of water-soluble phosphoinositide headgroup analogues (500  $\mu\text{M}$ ) titrated into selected PX domain proteins and their mutants (20  $\mu\text{M}$ ) measured by ITC. Top panels show the raw data and bottom panels represent the integrated and normalized data fit with a 1:1 binding model. The binding affinities ( $K_d$ ) are provided in Supplementary Table 1.

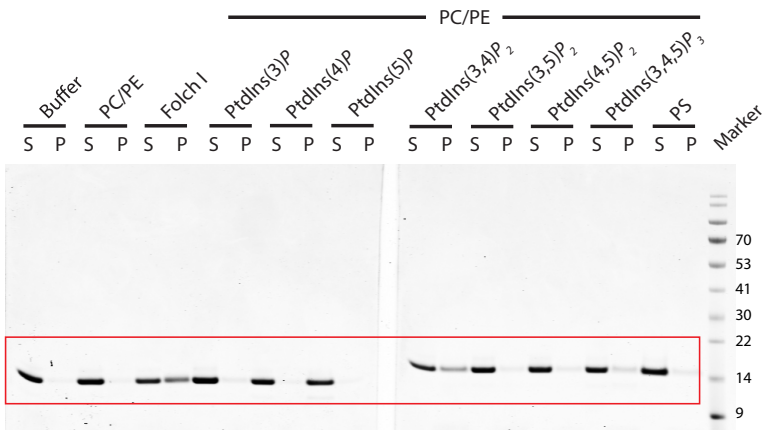

SNX1

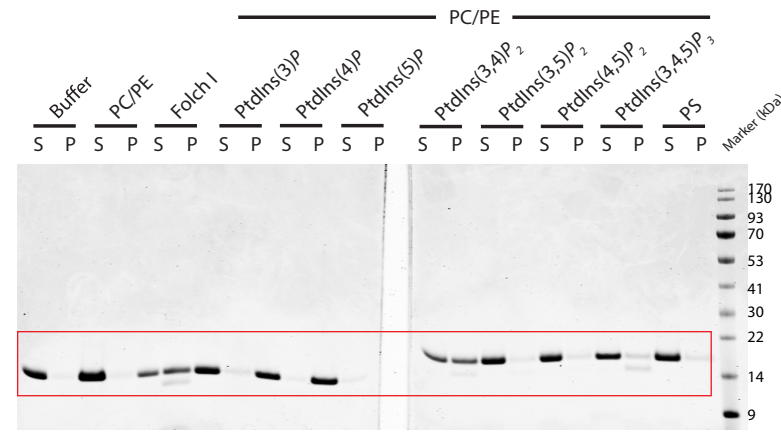

SNX2

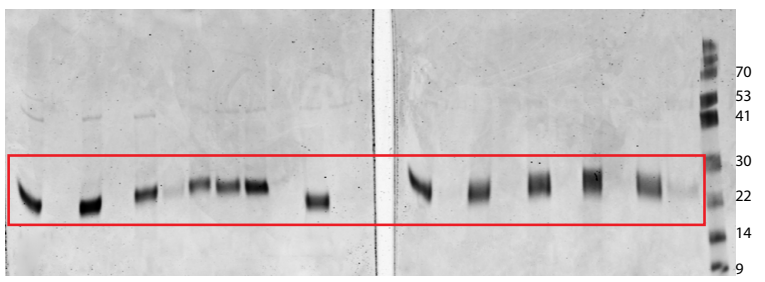

SNX3

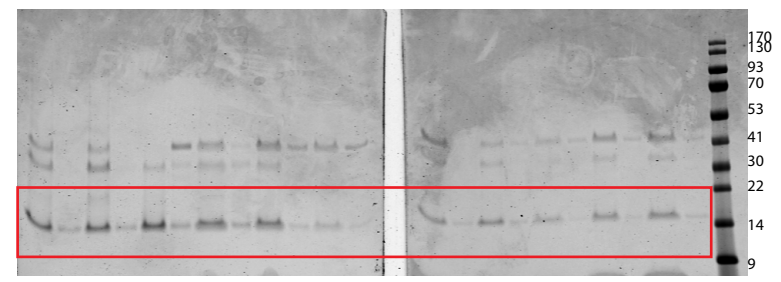

SNX4

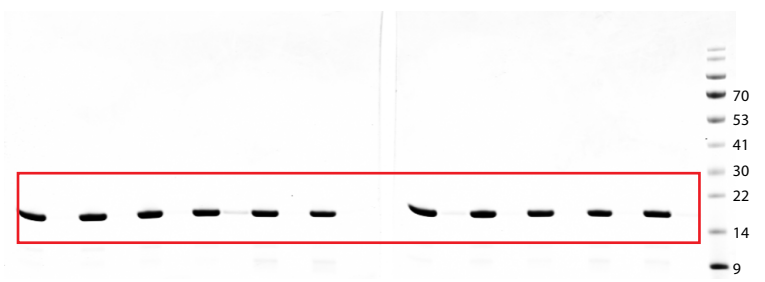

SNX5

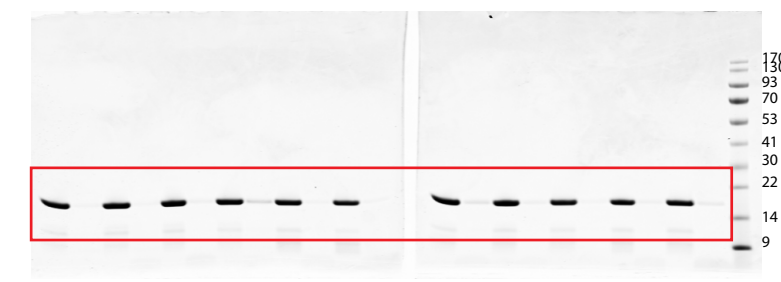

SNX6

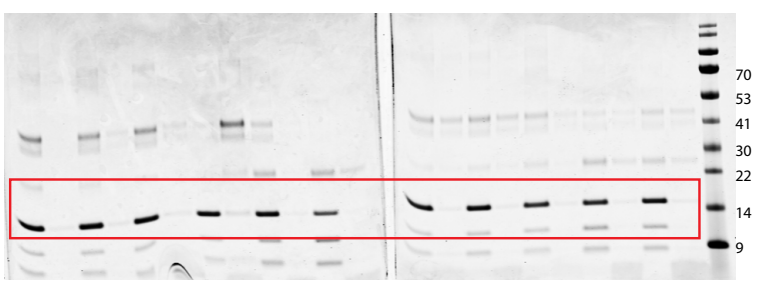

SNX7

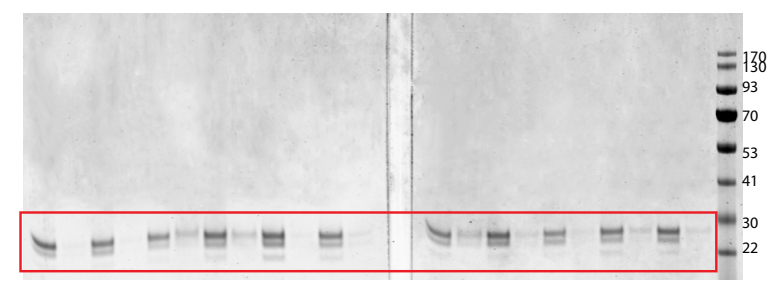

SNX9

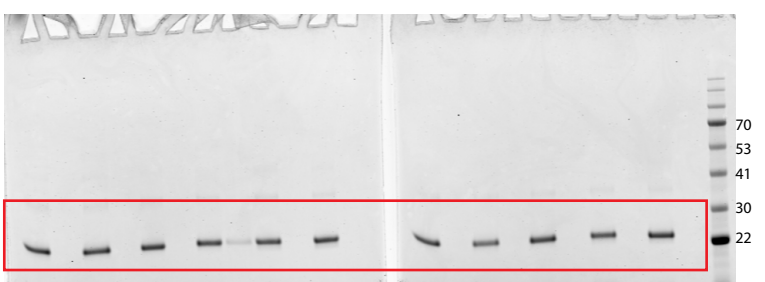

SNX10

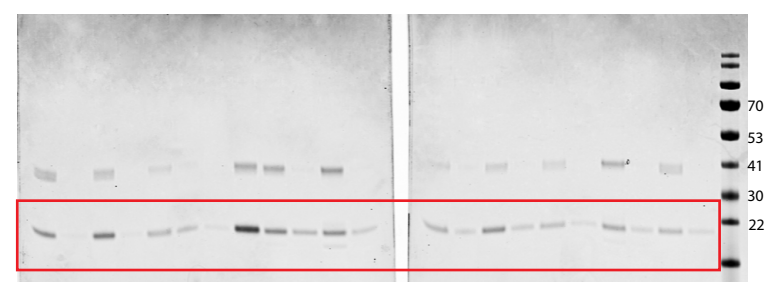

SNX11

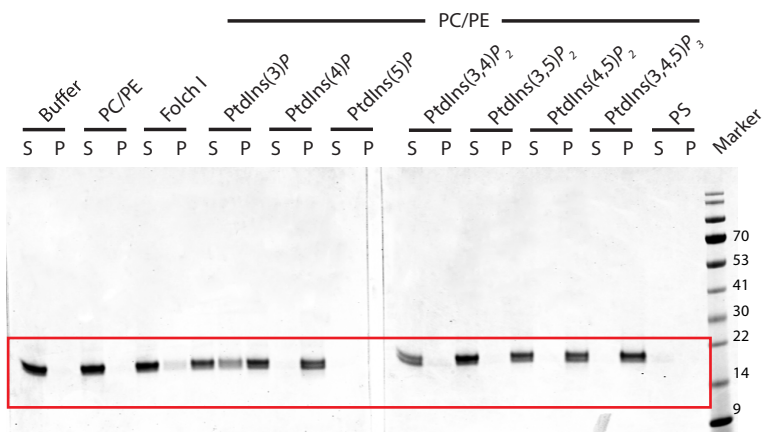

SNX12

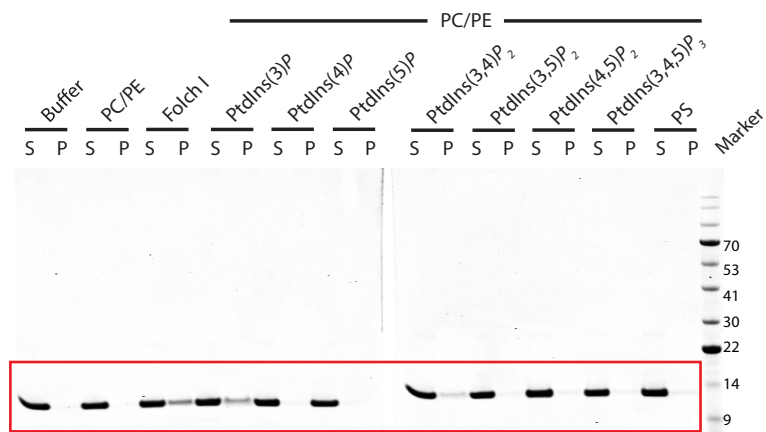

SNX13

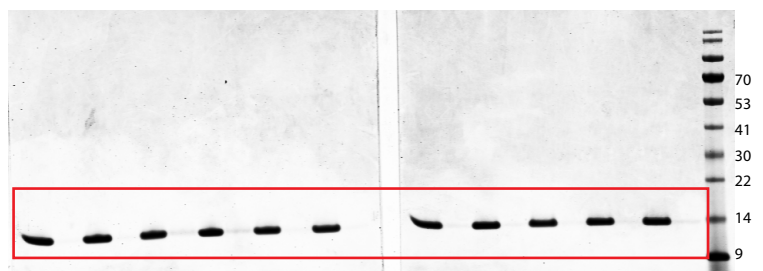

SNX14

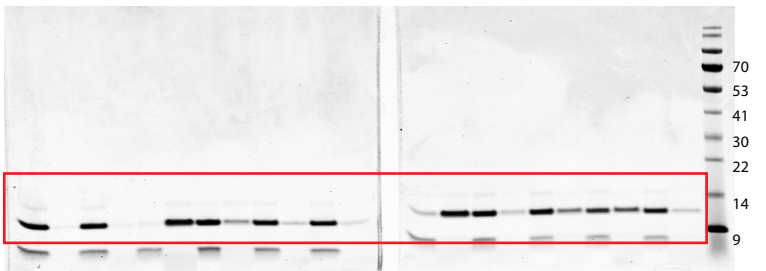

SNX15

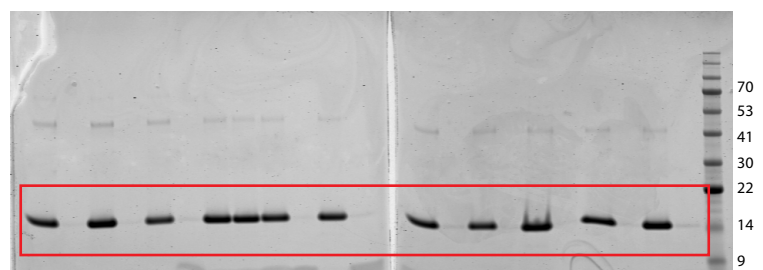

SNX16

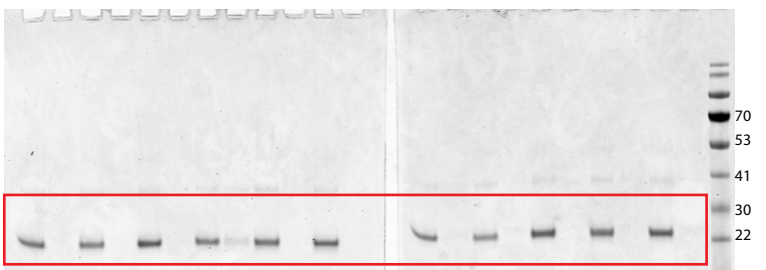

SNX17

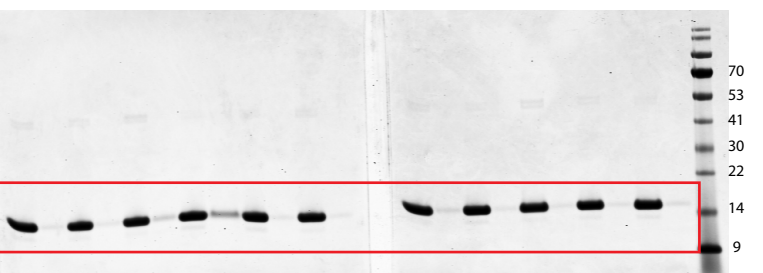

SNX19

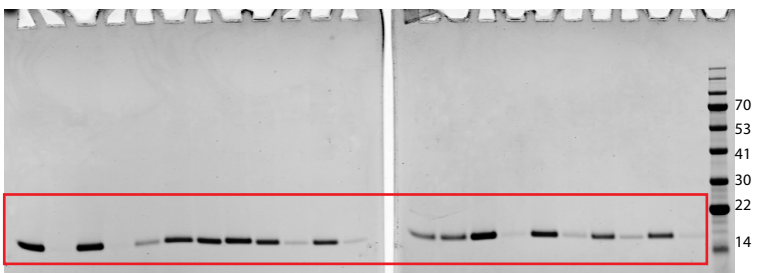

SNX22

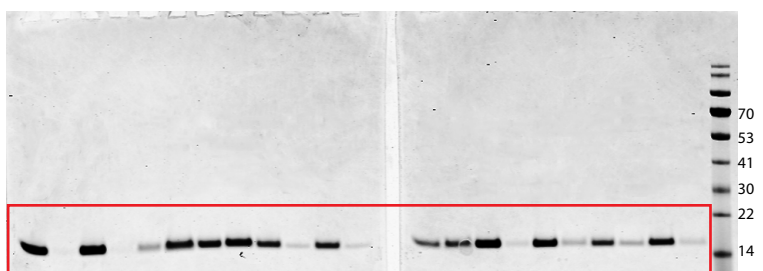

SNX23

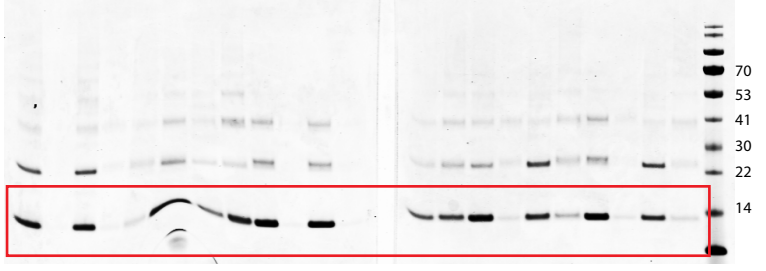

SNX24

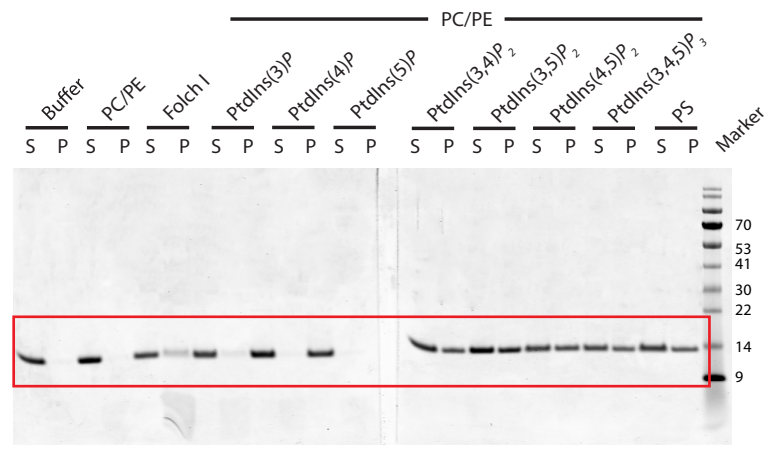

SNX25

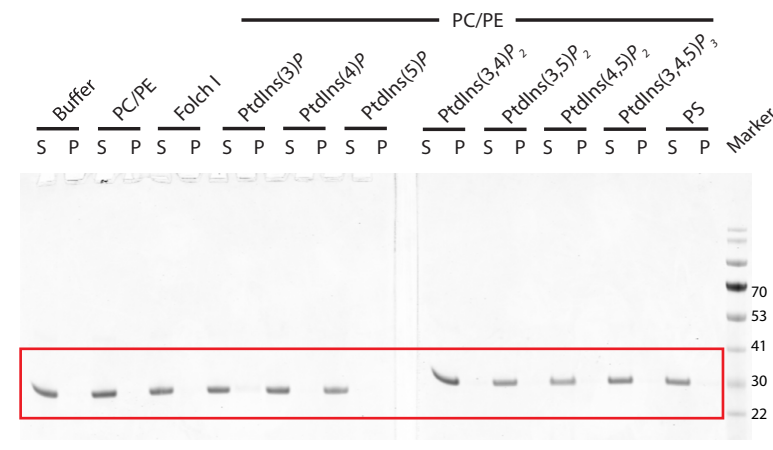

SNX26

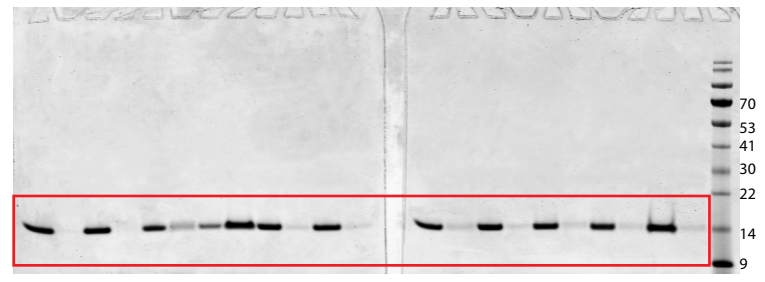

SNX27

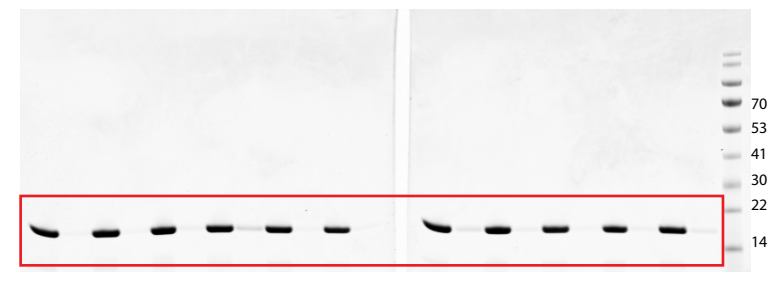

SNX28

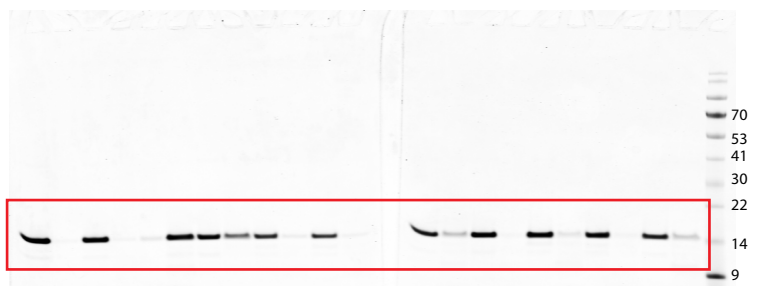

SNX29

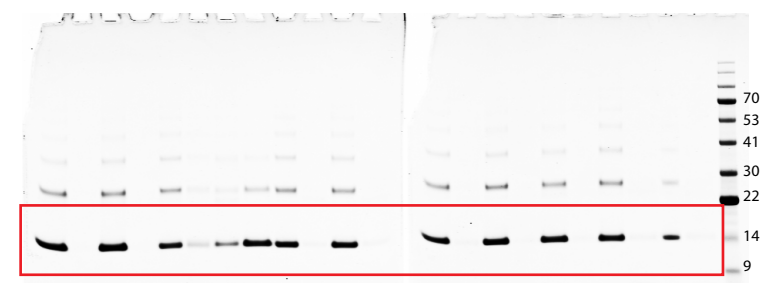

SNX31

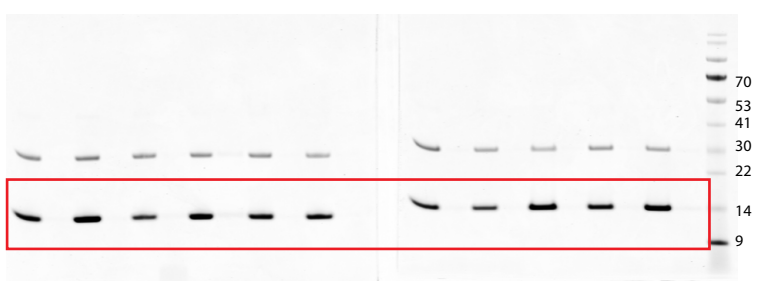

SNX32

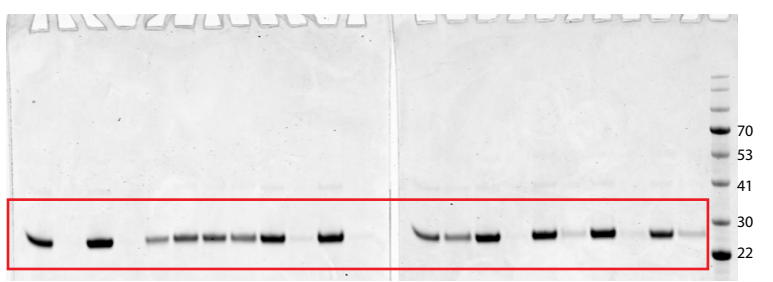

SGK3

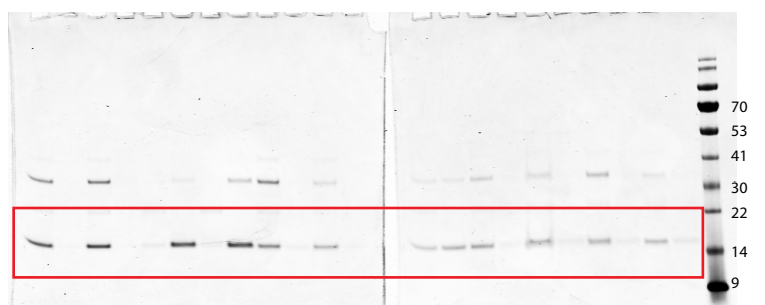

RPS6KC1

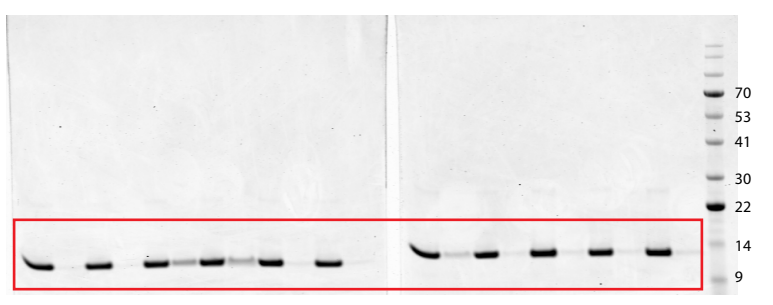

IRAS

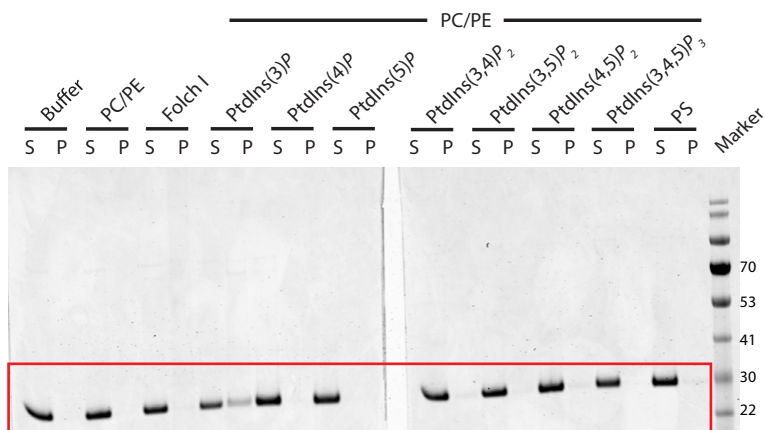

p40phox

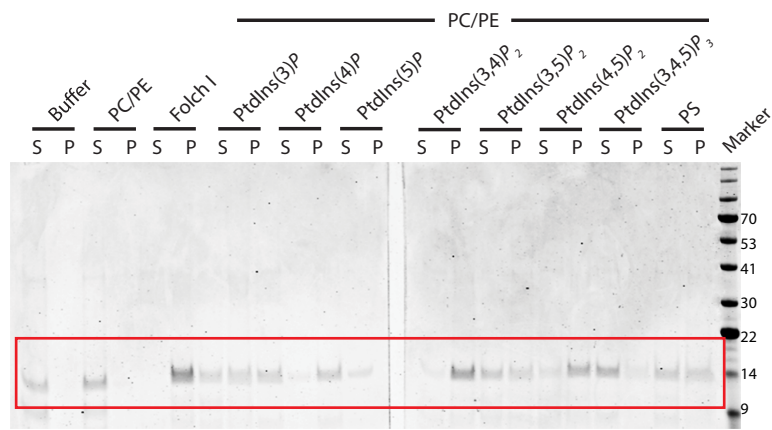

p47phox

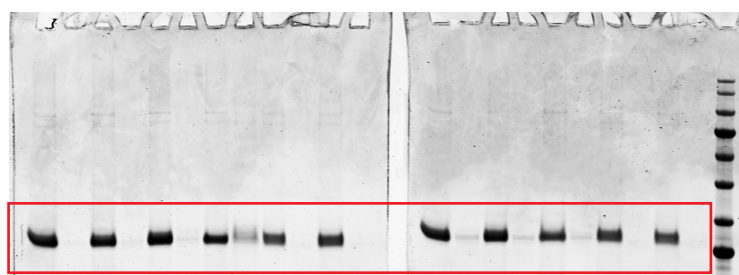

PXK

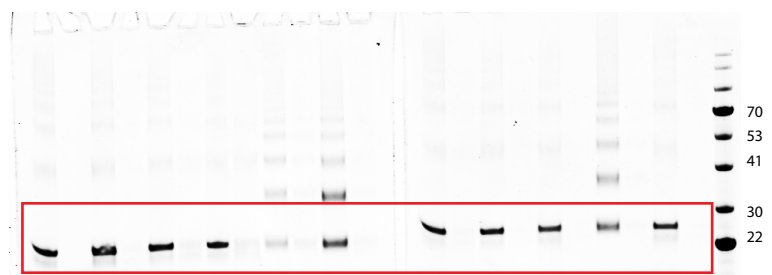

RICS

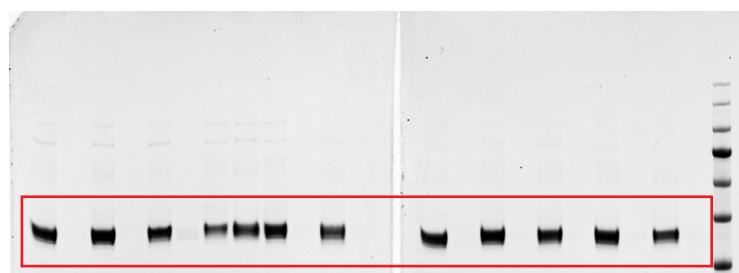

SH3PXD2A

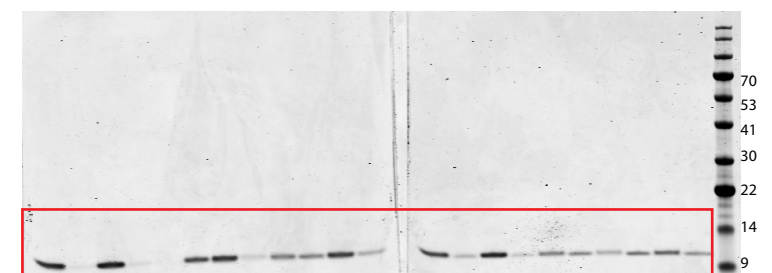

HS1BP3

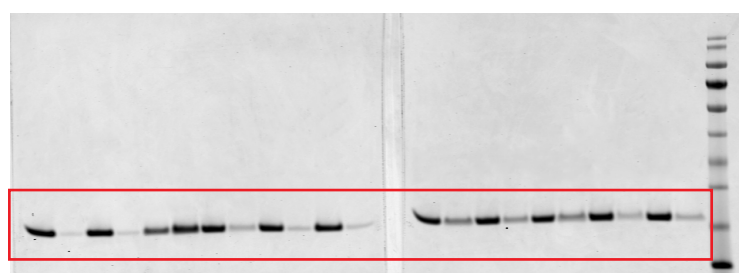

PI3KC2 $\alpha$

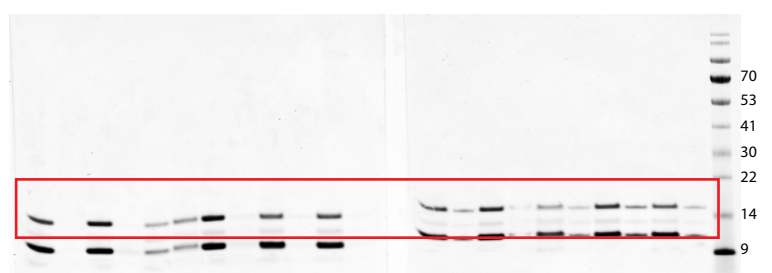

PI3KC2 $\beta$

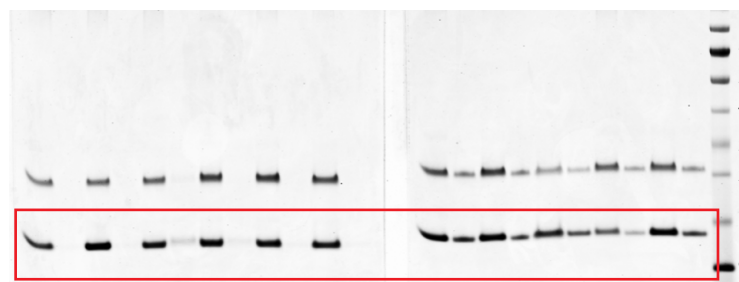

PI3KC2 $\gamma$

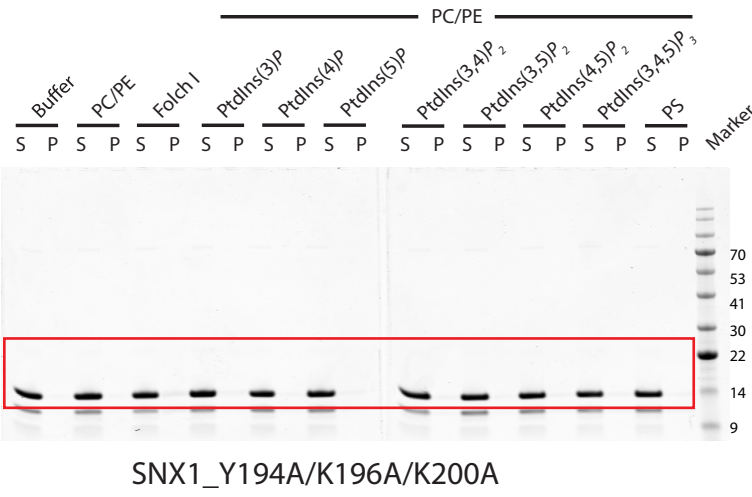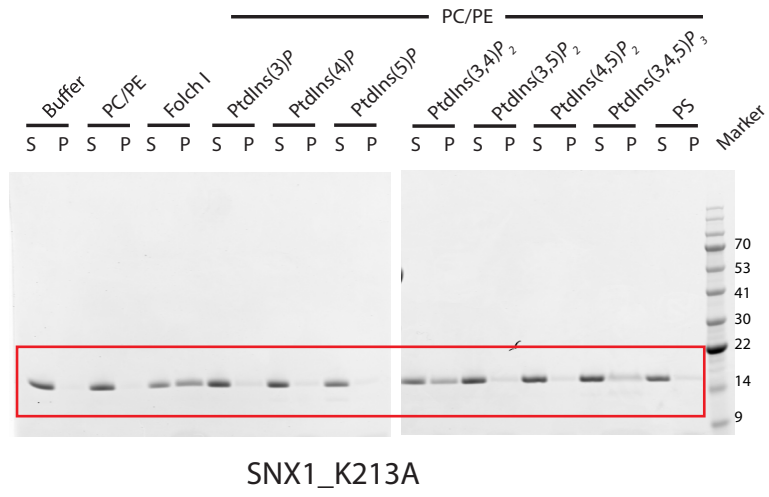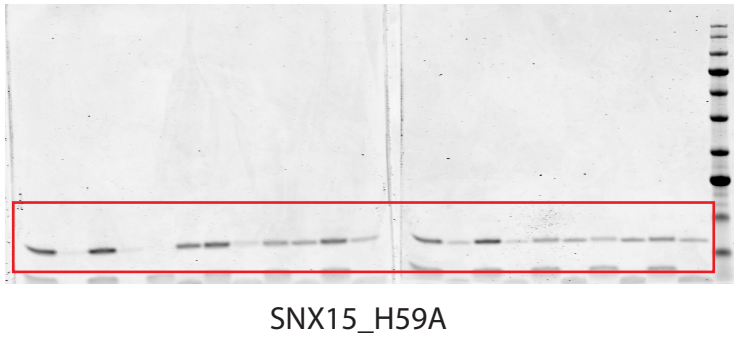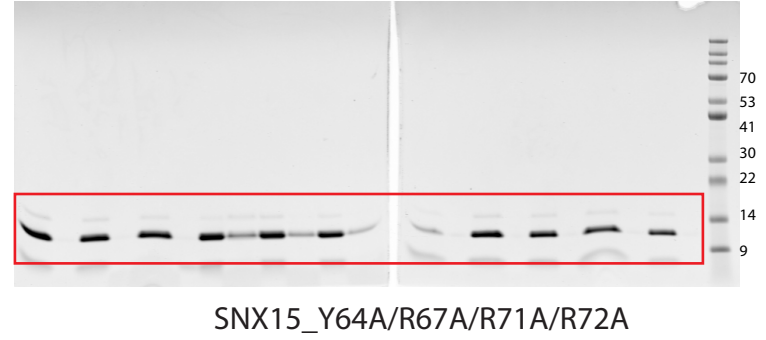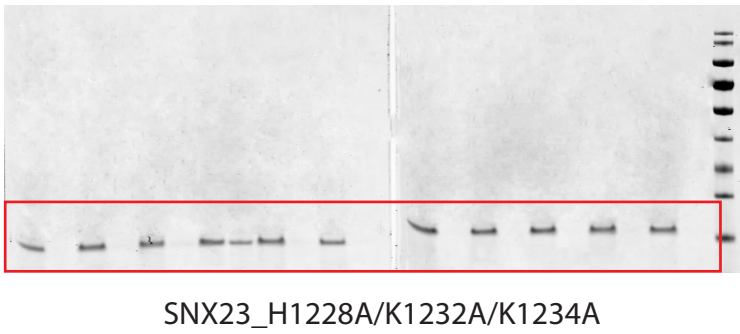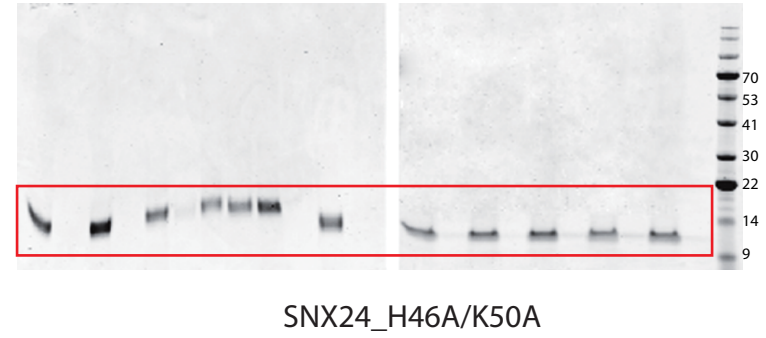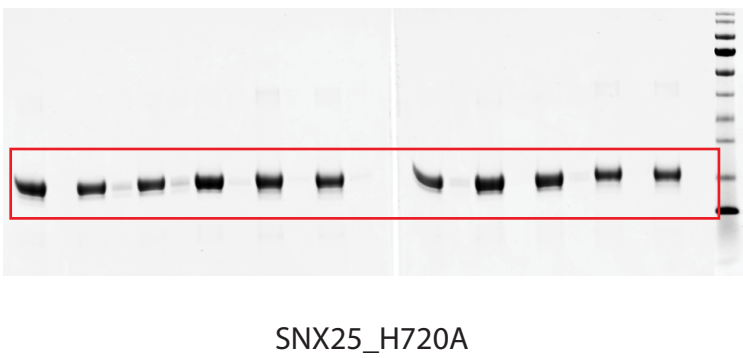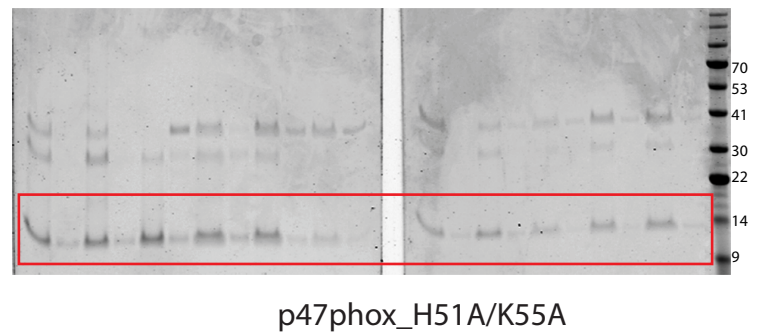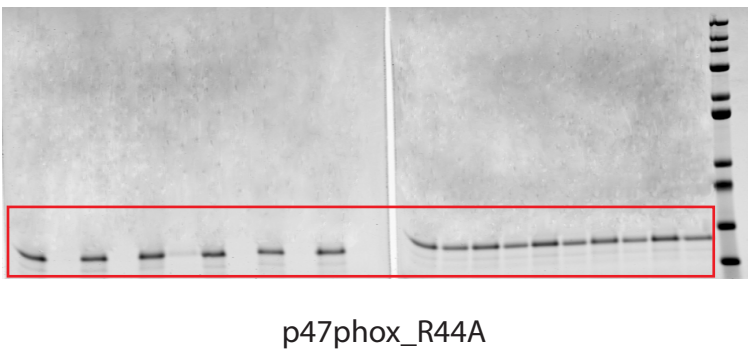

**Supplementary Table 1.** Previously reported structures and PtdIns*P*-binding specificities of mammalian PX proteins.

| Family                | PX protein              | Aliases          | PDB ID | Structure (method/ligand) | References         | PtdIns <i>P</i> specificity | Methods                           | $K_d$ ( $\mu$ M)           | References |      |
|-----------------------|-------------------------|------------------|--------|---------------------------|--------------------|-----------------------------|-----------------------------------|----------------------------|------------|------|
| <b>PX-BAR</b>         | SNX1                    |                  | 2I4K   | NMR/apo                   | (1)                | PI(3,5)P2                   | PIP strip                         | -                          | (2)        |      |
|                       |                         |                  |        |                           |                    | PI(3,4,5)P3                 | PIP strip                         | -                          | (2)        |      |
|                       |                         |                  |        |                           |                    | PI(4,5)P2                   | PIP strip                         | -                          | (3)        |      |
|                       |                         |                  |        |                           |                    | PI(3,4)P2                   | PIP strip                         | -                          | (3)        |      |
|                       |                         |                  |        |                           |                    | PI(3,5)P2                   | PIP strip                         | -                          | (3)        |      |
|                       |                         |                  |        |                           |                    | PI(3,4,5)P3                 | PIP strip                         | -                          | (3)        |      |
|                       |                         |                  |        |                           |                    | PI(3)P                      | Liposome binding                  | 1.1                        | (3)        |      |
|                       |                         |                  |        |                           |                    | PI(3,5)P2                   | Liposome binding                  | 3.1                        | (3)        |      |
|                       |                         |                  |        |                           |                    | PI3P                        | Fluorescent liposome binding      | 0.24                       | (4)        |      |
|                       |                         |                  |        |                           |                    | PI(3,5)P2                   | PIP pulldown                      | -                          | (5)        |      |
|                       | SNX2                    | TRG-9            |        | -                         |                    |                             | PI(3)P                            | PIP strip                  | -          | (2)  |
|                       |                         |                  |        |                           |                    |                             | PI(3)P                            | Liposome binding           | 4.4        | (6)  |
|                       |                         |                  |        |                           |                    |                             | PI(3,5)P2                         | Liposome binding           | 8.3        | (6)  |
|                       |                         |                  |        |                           |                    |                             | PI(3,5)P2                         | PIP pulldown               | -          | (5)  |
|                       | SNX4                    |                  |        | -                         |                    | PI3P                        | Liposome pelleting                | -                          | (7)        |      |
|                       | SNX5                    |                  |        | 3HPC                      | X-ray/apo          | (8)                         | PI3P                              | Liposome binding           | -          | (9)  |
|                       |                         |                  |        | 3HPB                      | X-ray/apo          | (8)                         | PI(3,4)P2                         | Liposome binding           | -          | (9)  |
|                       |                         |                  |        | 5WY2                      | X-ray/IncE peptide | (10)                        | PI(4,5)P2                         | NMR titration              | 410        | (8)  |
|                       |                         |                  |        | 5TGI                      | X-ray/IncE peptide | (11)                        | PI(4)P                            | PIP strip                  | -          | (12) |
|                       |                         |                  |        | 5TGJ                      | X-ray/IncE peptide | (11)                        | PI(5)P                            | PIP strip                  | -          | (12) |
| 5TGH                  |                         |                  |        | X-ray/IncE peptide        | (11)               | PI(3,5)P2                   | PIP strip                         | -                          | (12)       |      |
| 5TP1                  |                         |                  |        | X-ray/IncE peptide        | (13)               | PI(3,4,5)P3                 | PIP pulldown                      | -                          | (14)       |      |
| SNX6                  | TFAF2                   |                  | -      |                           |                    | PI4P                        | Liposome pelleting                | -                          | (15)       |      |
| SNX7                  |                         |                  | 3IQ2   | X-ray/SO <sub>4</sub>     | -                  | PI(3)P                      | Lipid overlay in microtitre plate | -                          | (16)       |      |
| SNX8                  |                         |                  | -      |                           |                    | -                           |                                   |                            |            |      |
| SNX30                 |                         |                  | -      |                           |                    | -                           |                                   |                            |            |      |
| SNX32                 |                         |                  | 6E8R   | X-ray/IncE peptide        | -                  | -                           |                                   |                            |            |      |
| <b>SH3-PX-BAR</b>     | SNX9                    | SH3PX1, SH3PXD3A | 3DYU   | X-ray/apo                 | (17)               | Generic PtdIns lipids       | PIP strip                         | -                          | (18)       |      |
|                       |                         |                  | 3DYT   | X-ray/apo                 | (17)               | PI(3)P                      | Liposome binding                  | -                          | (19)       |      |
|                       |                         |                  | 2RAJ   | X-ray/SO <sub>4</sub>     | (20)               | PI(3,4)P2                   | Liposome binding                  | -                          | (19)       |      |
|                       |                         |                  | 2RAK   | X-ray/PI(3)P              | (20)               | PI(4,5)P2                   | Liposome binding                  | -                          | (19)       |      |
|                       |                         |                  | 2RAI   | X-ray/apo                 | (20)               | PI(3,4,5)P3                 | Liposome binding                  | -                          | (19)       |      |
|                       |                         |                  |        |                           |                    | PI(3,4,5)P3                 | PIP strip                         | -                          | (21)       |      |
|                       |                         |                  |        |                           |                    | PI(4,5)P2                   | Liposome binding                  | -                          | (22)       |      |
|                       |                         |                  |        |                           |                    | PI(3)P                      | Liposome binding                  | -                          | (20)       |      |
|                       |                         |                  |        |                           |                    | PI(4,5)P2                   | Liposome binding                  | -                          | (20)       |      |
|                       |                         |                  |        |                           |                    | PI(3,4)P2                   | Liposome binding                  | -                          | (23)       |      |
|                       |                         |                  |        |                           |                    | PI(4,5)P2                   | Liposome binding                  | -                          | (23)       |      |
|                       |                         |                  |        |                           |                    | PI(3,4,5)P3                 | Liposome binding                  | -                          | (23)       |      |
|                       |                         |                  |        |                           |                    | PI(3,5)P2                   | Liposome binding                  | -                          | (23)       |      |
|                       |                         |                  |        |                           |                    | PI(3,4)P2                   | PIP strip and liposome binding    | -                          | (24)       |      |
|                       |                         |                  |        |                           |                    | PI(4,5)P2                   | PIP strip and liposome binding    | -                          | (24)       |      |
|                       |                         |                  |        |                           |                    | PI(3,4,5)P3                 | PIP strip and liposome binding    | -                          | (24)       |      |
|                       |                         |                  |        |                           |                    | PI(3,5)P2                   | PIP strip and liposome binding    | -                          | (24)       |      |
|                       |                         |                  |        |                           |                    | PI(3)P                      | PIP strip and liposome binding    | -                          | (24)       |      |
|                       |                         |                  |        |                           |                    | PI(4)P                      | PIP strip and liposome binding    | -                          | (24)       |      |
|                       |                         |                  |        |                           |                    | PI(5)P                      | PIP strip and liposome binding    | -                          | (24)       |      |
|                       | SNX18                   | SH3PXD3B, SNAG1  |        | -                         |                    |                             | PI(3,4)P2                         | Liposome binding           | -          | (25) |
|                       |                         |                  |        |                           |                    |                             | PI(3,5)P2                         | Liposome binding           | -          | (25) |
|                       |                         |                  |        |                           |                    |                             | PI(4,5)P2                         | Liposome binding           | -          | (25) |
|                       |                         |                  |        |                           |                    | All PtdIns lipid headgroups | PIP strip                         | -                          | (26)       |      |
| SNX33                 | SH3PX3, SH3PXD3C, SNX30 |                  | 4AKV   | X-ray/apo                 | -                  | -                           |                                   |                            |            |      |
| <b>PXA-RGS-PX-PXC</b> | SNX13                   | RGSPX1, KIAA0713 | -      |                           |                    | PI3P                        | Liposome pelleting                | -                          | (27)       |      |
|                       |                         |                  |        |                           |                    | PI(3)P                      | PIP strip                         | -                          | (28)       |      |
|                       |                         |                  |        |                           |                    | PI(5)P                      | PIP strip                         | -                          | (28)       |      |
|                       |                         |                  |        |                           |                    | PI(3,5)P2                   | PIP strip                         | -                          | (28)       |      |
|                       | SNX14                   |                  |        | 4PQO                      | X-ray/apo          | (27)                        | No interactions                   | Liposome pelleting and NMR | -          | (27) |
|                       |                         |                  |        | 4PQP                      | X-ray/apo          | (27)                        |                                   |                            |            |      |
| SNX19                 | KIAA0254                |                  | 4P2I   | X-ray/apo                 | (27)               | PI3P                        | Liposome pelleting                | -                          | (27)       |      |
|                       |                         |                  | 4P2J   | X-ray/SO <sub>4</sub>     | (27)               |                             |                                   |                            |            |      |
| SNX25                 | MSTP043                 |                  | 5WOE   | NMR/apo                   | This study         | -                           |                                   |                            |            |      |
| <b>PX-FERM-like</b>   | SNX17                   | KIAA0064         | 3FOG   | X-ray/apo                 | -                  | PI(3)P                      | PIP strip                         | -                          | (29)       |      |
|                       |                         |                  | 3LUI   | X-ray/SO <sub>4</sub>     | (30)               | PI(3)P                      | Liposome binding                  | -                          | (31)       |      |
|                       |                         |                  |        |                           |                    | PI(3)P                      | PIP strip                         | -                          | (32)       |      |
|                       |                         |                  |        |                           |                    | PI(3)P                      | ITC                               | 18                         | (30)       |      |
|                       |                         |                  |        |                           |                    | PI(3)P                      | Liposome binding                  | -                          | (30)       |      |
|                       |                         |                  |        |                           |                    | PI(3)P                      | PIP strip                         | -                          | (33)       |      |
|                       | SNX27                   | KIAA0488, My014  |        | 4HAS                      | X-ray              | -                           | PI(3)P                            | PIP strip                  | -          | (33) |
|                       |                         |                  |        |                           |                    |                             | PI(3)P                            | ITC                        | 15         | (30) |
|                       |                         |                  |        |                           |                    |                             | PI(3)P                            | PIP strip                  | -          | (34) |
| SNX31                 |                         |                  | -      |                           |                    | -                           |                                   |                            |            |      |
| <b>PX-only</b>        | SNX3                    |                  | 2MX3   | NMR/apo                   | -                  | PI(3)P                      | PIP strip                         | -                          | (2)        |      |

|               |          |                              |      |                           |           |                                                     |                                   |           |          |
|---------------|----------|------------------------------|------|---------------------------|-----------|-----------------------------------------------------|-----------------------------------|-----------|----------|
|               |          |                              | 2F0J | X-ray/Vps26-Vps35         | (35)      | PI(3)P                                              | Liposome binding                  | -         | (20)     |
|               |          |                              | 2F0L | X-ray/Vps26-Vps25-Dmt1-II | (35)      | PI(3)P                                              | Lipid overlay in microtitre plate | -         | (16)     |
|               |          |                              | 2F0M | X-ray/Vps26-Vps25-Dmt1-II | (35)      | PI(3)P                                              | PIP strip                         | -         | (36)     |
|               |          |                              |      |                           |           | PI(3)P                                              | PIP strip                         | -         | (37)     |
|               |          |                              |      |                           |           | PI(3)P                                              | PIP strip                         | -         | (38)     |
|               |          |                              |      |                           |           | PI3P                                                | Cellular microinjection           | -         | (1)      |
|               |          |                              |      |                           |           | PI3P                                                | Fluorescent liposome binding      | 0.19      | (4)      |
|               |          |                              |      |                           |           | PI3P                                                | Liposome binding                  | -         | (12)     |
|               |          |                              |      |                           |           | PI3P                                                | Liposome binding                  | -         | (39)     |
|               | SNX10    |                              | 4ON3 | X-ray/apo                 | (40)      | -                                                   |                                   |           |          |
|               |          |                              | 4PZG | X-ray/apo                 | (40)      |                                                     |                                   |           |          |
|               | SNX11    |                              | 4IKB | X-ray/apo                 | (41)      | PI3P                                                | PIP strip                         | -         | (41)     |
|               |          |                              | 4IKD | X-ray/apo                 | (41)      | PI(3,5)P2                                           | PIP strip                         | -         | (41)     |
|               | SNX12    |                              | 2CSK | NMR/apo                   | -         | PI3P                                                | Fluorescent liposome binding      | 0.13      | (4)      |
|               |          |                              |      |                           |           | PI3P                                                | Liposome pelleting                | -         | (42)     |
|               | SNX22    |                              | 2ETT | NMR/apo                   | (43)      | PI(3)P                                              | NMR titration                     | 1100      | (43)     |
|               | SNX24    | SBB131, UNQ654, PRO1284      | -    |                           |           | -                                                   |                                   |           |          |
|               | HS1BP3   |                              | -    |                           |           | PA at 30%                                           | liposome pelleting and PIP strip  | -         | (44)     |
|               |          |                              |      |                           |           | PI3P                                                | liposome pelleting and PIP strip  | -         | (44)     |
|               |          |                              |      |                           |           | PI4P                                                | PIP strip                         | -         | (44)     |
|               |          |                              |      |                           |           | PI5P                                                | PIP strip                         | -         | (44)     |
|               |          |                              |      |                           |           | PI(3,4)P2                                           | liposome pelleting and PIP strip  | -         | (44)     |
|               |          |                              |      |                           |           | PI(3,5)P2                                           | liposome pelleting and PIP strip  | -         | (44)     |
|               |          |                              |      |                           |           | PI(3,4,5)P3                                         | liposome pelleting and PIP strip  | -         | (44)     |
| PX-SH3        | SH3PXD2A | FISH, KIAA0418, SH3MD1, TKS5 | -    |                           |           | PI(3)P                                              | PIP strip                         | -         | (45)     |
|               |          |                              |      |                           |           | PI(3,4)P2                                           | PIP strip                         | -         | (45)     |
|               | SH3PXD2B | FAD49, KIAA1295, TKS4        | -    |                           |           | PI(3)P                                              | PIP strip                         | -         | (46)     |
|               |          |                              |      |                           |           | PI(3,4)P2                                           | PIP strip                         | -         | (46)     |
|               | SNX28    | NOXO1, p41NOX, SH3PXD5       | 2L73 | NMR/apo                   | -         | PI(4)P                                              | PIP strip                         | -         | (47, 48) |
|               |          |                              |      |                           |           | PI(5)P                                              | PIP strip                         | -         | (47, 48) |
|               |          |                              |      |                           |           | PI(3,5)P2                                           | PIP strip                         | -         | (47, 48) |
|               |          |                              |      |                           |           | PI(3)P                                              | PIP strip                         | -         | (49)     |
|               |          |                              |      |                           |           | PI(4)P                                              | PIP strip                         | -         | (49)     |
|               |          |                              |      |                           |           | PI(5)P                                              | PIP strip                         | -         | (49)     |
|               |          |                              |      |                           |           | PI(3,5)P2                                           | PIP strip                         | -         | (49)     |
|               |          |                              |      |                           |           | PA                                                  | PIP strip                         | -         | (49)     |
|               | p40phox  | NCF4, SH3PXD4                | 2DYB | X-ray/apo                 | (50)      | PI(3)P                                              | PIP strip and liposome binding    | -         | (51)     |
|               |          |                              | 1H6H | X-ray/PI(3)P              | (52)      | PI(3)P                                              | Biosensor liposome interaction    |           | (53)     |
|               |          |                              |      |                           |           | PI(3)P                                              | Liposome binding                  | -         | (39)     |
|               |          |                              |      |                           |           | PI(3)P                                              | Crystal structure and ITC         | 5.0       | (52)     |
|               |          |                              |      |                           |           | PI(3)P                                              | Liposome binding and PIP strip    | -         | (54)     |
|               |          |                              |      |                           |           | PI(3)P                                              | Biosensor liposome interaction    | 0.001-0.1 | (55)     |
|               |          |                              |      |                           |           | PI(3)P                                              | Liposome binding                  | -         | (50)     |
|               | p47phox  | NCF1, SH3PXD1A               | 1KQ6 | X-ray/SO <sub>4</sub>     | -         | PI(3,4)P2                                           | PIP strip                         | -         | (47)     |
|               |          |                              | 1O7K | X-ray/SO <sub>4</sub>     | (56)      | PI(3,4)P2                                           | PIP strip and liposome binding    | -         | (51)     |
|               |          |                              | 1GD5 | NMR/apo                   | (57)      | PI(3,5)P                                            | PIP strip and liposome binding    | -         | (51)     |
|               |          |                              |      |                           |           | PI(3,4)P2                                           | Liposome binding                  | -         | (39)     |
|               |          |                              |      |                           |           | PI(3,4)P2                                           | Liposome binding                  | -         | (54)     |
|               |          |                              |      |                           |           | PI(3)P                                              | Liposome binding                  | -         | (54)     |
|               |          |                              |      |                           |           | PI(3,5)P2                                           | Liposome binding                  | -         | (54)     |
|               |          |                              |      |                           |           | PI(3,4)P2                                           | Biosensor liposome interaction    | 0.0015    | (55)     |
|               |          |                              |      |                           | PI(3,4)P2 | Liposome binding and Biosensor liposome interaction | 34-59                             | (58)      |          |
| PX-S/T kinase | PXK      | MONaKA                       | -    |                           |           | PI(3)P                                              | PIP strip                         | -         | (59)     |
|               | RPS6KC1  | RPK118, humS6PKh1            | -    |                           |           | PI(3)P                                              | PIP strip                         | -         | (60)     |
|               | SGK3     | CISK, SGK1                   | 1XTE | X-ray/apo                 | (61)      | PI(3,5)P2                                           | PIP strip                         | -         | (62)     |
|               |          |                              | 1XTN | X-ray/SO <sub>4</sub>     | (61)      | PI(4,5)P2                                           | PIP strip                         | -         | (62)     |
|               |          |                              |      |                           |           | PI(3,4,5)P3                                         | PIP strip                         | -         | (62)     |
|               |          |                              |      |                           |           | PI(3)P                                              | PIP strip and liposome binding    | -         | (63)     |
|               |          |                              |      |                           |           | PI3P                                                | Cellular microinjection           | -         | (1)      |
| PX-SH3-GAP    | SNX26    | ARHGAP33, TC-GAP, NOMA-GAP   |      |                           |           | PI(3)P                                              | PIP strip                         | -         | (64)     |
|               |          |                              |      |                           |           | PI(3)P                                              | PIP strip                         | -         | (65)     |
|               |          |                              |      |                           |           | PI(4)P                                              | PIP strip                         | -         | (65)     |
|               |          |                              |      |                           |           | PI(4,5)P2                                           | PIP strip                         | -         | (65)     |
|               |          |                              |      |                           |           | PI(3,4)P2                                           | PIP strip                         | -         | (65)     |
|               | PX-RICS  | ARHGAP32, GC-GAP, p250GAP,   | -    |                           |           | PI(3)P                                              | PIP strip and liposome binding    | -         | (66)     |
|               |          |                              |      |                           |           | PI(4)P                                              | PIP strip and                     | -         | (66)     |

|               |           |                 |      |                       |                 |                  |                                  |        |      |
|---------------|-----------|-----------------|------|-----------------------|-----------------|------------------|----------------------------------|--------|------|
|               |           | p200GAP, Grit   |      |                       |                 | PI(4)P           | liposome binding                 |        |      |
|               |           |                 |      |                       |                 |                  | PIP strip and liposome binding   | -      | (66) |
| PX-PI3-kinase | PI3K-C2□  | PIK3C2A         | 2RED | X-ray/apo             | (67)            | PI(4,5)P2        | Biosensor liposome interaction   | 0.025  | (68) |
|               |           |                 | 2REA | X-ray/apo             | (67)            | PI(4,5)P2        | Liposome binding                 | -      | (69) |
|               |           |                 | 2AR5 | X-ray/apo             | (67)            |                  |                                  |        |      |
|               |           |                 | 2IWL | X-ray/SO <sub>4</sub> | (68)            |                  |                                  |        |      |
|               | PI3K-C2□  | PIK3C2B         |      |                       |                 | -                |                                  |        |      |
|               | PI3K-C2□  | PIK3C2G         | 2WWE | X-ray/apo             | -               |                  |                                  |        |      |
| PX-PH-PLD     | PLD1      |                 | -    |                       |                 | PI(5)P           | PIP strip                        | -      | (70) |
|               |           |                 |      |                       |                 | PI(3)P           | Biosensor liposome interaction   | 0.14   | (71) |
|               |           |                 |      |                       |                 | PI(4)P           | Biosensor liposome interaction   | 1.8    | (71) |
|               |           |                 |      |                       |                 | PI(5)P           | Biosensor liposome interaction   | 0.22   | (71) |
|               |           |                 |      |                       |                 | PI(4,5)P2        | Biosensor liposome interaction   | 1.0    | (71) |
|               |           |                 |      |                       |                 | PI(3,4)P2        | Biosensor liposome interaction   | 5.0    | (71) |
|               |           |                 |      |                       |                 | PI(3,5)P2        | Biosensor liposome interaction   | 3.2    | (71) |
|               |           |                 |      |                       |                 | PI(3,4,5)P3      | Biosensor liposome interaction   | 0.018  | (71) |
|               |           |                 |      |                       |                 | PI(3,4,5)P3      | Liposome pelleting               | -      | (72) |
|               |           |                 |      | -                     | No interactions | Liposome binding | -                                | (72)   |      |
| PX-PXB        | SNX20     | SLIC-1          | -    |                       |                 | PI(4)P           | PIP strip                        | -      | (73) |
|               |           |                 |      |                       |                 | PI(5)P           | PIP strip                        | -      | (73) |
|               |           |                 |      |                       |                 | PI(3,5)P2        | PIP strip                        | -      | (73) |
|               |           | SNX21           |      | -                     |                 |                  | -                                |        |      |
| Kinesin-PX    | KIF16B    | SNX23           | 2V14 | X-ray/apo             | (74)            | PI(3)P           | Biosensor liposome interaction   | 0.028  | (75) |
|               |           |                 | 6EE0 | X-ray/apo             | This study      | PI(3,4)P2        | Biosensor liposome interaction   | 0.04   | (75) |
|               |           |                 |      |                       |                 | PI(3,4,5)P3      | Biosensor liposome interaction   | 0.099  | (75) |
|               |           |                 |      |                       |                 | PI3P             | PIP strip                        | -      | (76) |
|               |           |                 |      |                       |                 | PI((3)P          | Biosensor liposome interaction   | 0.0027 | (74) |
|               |           |                 |      |                       |                 | PI(3,4)P2        | Biosensor liposome interaction   | 0.0028 | (74) |
|               |           |                 |      |                       |                 | PI(3,5)P2        | Biosensor liposome interaction   | 0.3    | (74) |
|               |           |                 |      |                       |                 | PI(3,4,5)P3      | Biosensor liposome interaction   | 0.1    | (74) |
| PX-MIT        | SNX15     |                 | 6ECM | X-ray/SO <sub>4</sub> | This study      | PI3P             | Liposome pelleting and PIP strip | -      | (77) |
|               |           |                 | 6MBI | X-ray/SO <sub>4</sub> | This study      |                  |                                  |        |      |
| PX-LRR-IRAS   | Nischarin | IRAS, KIAA0975  | 3P0C | X-ray/apo             | -               | PI(3)P           | PIP strip                        | -      | (78) |
| PX-SNX16      | SNX16     |                 | 5GW0 | X-ray/apo             | (79)            | PI(3)P           | PIP strip                        | -      | (37) |
|               |           |                 | 5GW1 | X-ray/apo             | (79)            | PI(3)P           | PIP strip                        | -      | (80) |
|               |           |                 | 2V14 | X-ray                 |                 | PI3P             | Fluorescent liposome binding     | 0.31   | (4)  |
|               |           |                 |      |                       |                 | PI3P             | PIP strip and liposome pelleting | -      | (79) |
| SNX29-PX      | SNX29     | RUNDC2A         | -    |                       |                 | -                |                                  |        |      |
| PX-SNX34      | SNX34     | C6ORF145, PXDC1 | -    |                       |                 | -                |                                  |        |      |

## REFERENCES

1. Zhong Q, *et al.* (2005) Determinants of the endosomal localization of sorting nexin 1. *Molecular biology of the cell* 16(4):2049-2057.
2. Zhong Q, *et al.* (2002) Endosomal localization and function of sorting nexin 1. *Proc Natl Acad Sci U S A* 99(10):6767-6772.
3. Cozier GE, *et al.* (2002) The phox homology (PX) domain-dependent, 3-phosphoinositide-mediated association of sorting nexin-1 with an early sorting endosomal compartment is required for its ability to regulate epidermal growth factor receptor degradation. *The Journal of biological chemistry* 277(50):48730-48736.
4. Ceccato L, *et al.* (2016) PLIF: A rapid, accurate method to detect and quantitatively assess protein-lipid interactions. *Science signaling* 9(421):rs2.
5. Catimel B, *et al.* (2008) The PI(3,5)P2 and PI(4,5)P2 interactomes. *J Proteome Res* 7(12):5295-5313.
6. Carlton JG, *et al.* (2005) Sorting nexin-2 is associated with tubular elements of the early endosome, but is not essential for retromer-mediated endosome-to-TGN transport. *Journal of cell science* 118(Pt 19):4527-4539.
7. Traer CJ, *et al.* (2007) SNX4 coordinates endosomal sorting of TfnR with dynein-mediated transport into the endocytic recycling compartment. *Nat Cell Biol* 9(12):1370-1380.
8. Koharudin LM, Furey W, Liu H, Liu YJ, & Gronenborn AM (2009) The phox domain of sorting nexin 5 lacks PTDINS(3)P specificity and preferentially binds to PTDINS(4,5)P2. *The Journal of biological chemistry*.
9. Merino-Trigo A, *et al.* (2004) Sorting nexin 5 is localized to a subdomain of the early endosomes and is recruited to the plasma membrane following EGF stimulation. *Journal of cell science* 117(Pt 26):6413-6424.
10. Sun Q, *et al.* (2017) Structural and functional insights into sorting nexin 5/6 interaction with bacterial effector IncE. *Signal transduction and targeted therapy* 2:17030.
11. Paul B, *et al.* (2017) Structural basis for the hijacking of endosomal sorting nexin proteins by *Chlamydia trachomatis*. *eLife* 6.
12. Liu H, *et al.* (2006) Inhibitory regulation of EGF receptor degradation by sorting nexin 5. *Biochem Biophys Res Commun* 342(2):537-546.
13. Elwell CA, *et al.* (2017) *Chlamydia* interfere with an interaction between the mannose-6-phosphate receptor and sorting nexins to counteract host restriction. *eLife* 6.
14. Catimel B, *et al.* (2009) PI(3,4,5)P3 Interactome. *J Proteome Res* 8(7):3712-3726.
15. Niu Y, *et al.* (2013) PtdIns(4)P regulates retromer-motor interaction to facilitate dynein-cargo dissociation at the trans-Golgi network. *Nat Cell Biol* 15(4):417-429.
16. Xu Y, Hortsman H, Seet L, Wong SH, & Hong W (2001) SNX3 regulates endosomal function through its PX-domain-mediated interaction with PtdIns(3)P. *Nat Cell Biol* 3(7):658-666.
17. Wang Q, Kaan HY, Hooda RN, Goh SL, & Sondermann H (2008) Structure and plasticity of Endophilin and Sorting Nexin 9. *Structure* 16(10):1574-1587.
18. MaCaulay SL, *et al.* (2003) Insulin stimulates movement of sorting nexin 9 between cellular compartments: a putative role mediating cell surface receptor expression and insulin action. *Biochem J* 376(Pt 1):123-134.
19. Lundmark R & Carlsson SR (2003) Sorting nexin 9 participates in clathrin-mediated endocytosis through interactions with the core components. *The Journal of biological chemistry* 278(47):46772-46781.

20. Pylypenko O, Lundmark R, Rasmuson E, Carlsson SR, & Rak A (2007) The PX-BAR membrane-remodeling unit of sorting nexin 9. *Embo J* 26(22):4788-4800.
21. Badour K, *et al.* (2007) Interaction of the Wiskott-Aldrich syndrome protein with sorting nexin 9 is required for CD28 endocytosis and cosignaling in T cells. *Proc Natl Acad Sci U S A* 104(5):1593-1598.
22. Yarar D, Waterman-Storer CM, & Schmid SL (2007) SNX9 couples actin assembly to phosphoinositide signals and is required for membrane remodeling during endocytosis. *Dev Cell* 13(1):43-56.
23. Yarar D, Surka MC, Leonard MC, & Schmid SL (2008) SNX9 activities are regulated by multiple phosphoinositides through both PX and BAR domains. *Traffic* 9(1):133-146.
24. Shin N, *et al.* (2008) SNX9 regulates tubular invagination of the plasma membrane through interaction with actin cytoskeleton and dynamin 2. *Journal of cell science* 121(Pt 8):1252-1263.
25. Haberg K, Lundmark R, & Carlsson SR (2008) SNX18 is an SNX9 paralog that acts as a membrane tubulator in AP-1-positive endosomal trafficking. *Journal of cell science* 121(Pt 9):1495-1505.
26. Nakazawa S, *et al.* (2011) Expression of Sorting Nexin 18 (SNX18) Is Dynamically Regulated in Developing Spinal Motor Neurons. *J Histochem Cytochem* 59(2):202-213.
27. Mas C, *et al.* (2014) Structural basis for different phosphoinositide specificities of the PX domains of sorting nexins regulating G-protein signaling. *The Journal of biological chemistry* 289(41):28554-28568.
28. Zheng B, *et al.* (2001) RGS-PX1, a GAP for GalphaS and sorting nexin in vesicular trafficking. *Science* 294(5548):1939-1942.
29. Czubayko M, Knauth P, Schluter T, Florian V, & Bohnensack R (2006) Sorting nexin 17, a non-self-assembling and a PtdIns(3)P high class affinity protein, interacts with the cerebral cavernous malformation related protein KRIT1. *Biochem Biophys Res Commun* 345(3):1264-1272.
30. Ghai R, *et al.* (2011) Phox homology band 4.1/ezrin/radixin/moesin-like proteins function as molecular scaffolds that interact with cargo receptors and Ras GTPases. *Proc Natl Acad Sci U S A* 108(19):7763-7768.
31. Knauth P, *et al.* (2005) Functions of sorting nexin 17 domains and recognition motif for P-selectin trafficking. *J Mol Biol* 347(4):813-825.
32. van Kerkhof P, *et al.* (2005) Sorting nexin 17 facilitates LRP recycling in the early endosome. *EMBO J* 24(16):2851-2861.
33. Lunn ML, *et al.* (2007) A unique sorting nexin regulates trafficking of potassium channels via a PDZ domain interaction. *Nat Neurosci* 10(10):1249-1259.
34. Rincon E, *et al.* (2011) Translocation dynamics of sorting nexin 27 in activated T cells. *Journal of cell science* 124(Pt 5):776-788.
35. Lucas M, *et al.* (2016) Structural Mechanism for Cargo Recognition by the Retromer Complex. *Cell* 167(6):1623-1635 e1614.
36. Mizutani R, *et al.* (2009) Sorting nexin 3, a protein upregulated by lithium, contains a novel phosphatidylinositol-binding sequence and mediates neurite outgrowth in N1E-115 cells. *Cell Signal* 21(11):1586-1594.
37. Hanson BJ & Hong W (2003) Evidence for a role of SNX16 in regulating traffic between the early and later endosomal compartments. *The Journal of biological chemistry* 278(36):34617-34630.
38. Mor A, *et al.* (2009) Phospholipase D1 regulates lymphocyte adhesion via upregulation of Rap1 at the plasma membrane. *Mol Cell Biol* 29(12):3297-3306.

39. Ago T, *et al.* (2001) The PX domain as a novel phosphoinositide-binding module. *Biochem Biophys Res Commun* 287(3):733-738.
40. Xu T, *et al.* (2014) Structure of human SNX10 reveals insights into its role in human autosomal recessive osteopetrosis. *Proteins* 82(12):3483-3489.
41. Xu J, *et al.* (2013) Structure of sorting nexin 11 (SNX11) reveals a novel extended phox homology (PX) domain critical for inhibition of SNX10-induced vacuolation. *The Journal of biological chemistry* 288(23):16598-16605.
42. Pons V, *et al.* (2012) SNX12 role in endosome membrane transport. *PloS one* 7(6):e38949.
43. Song J, Zhao KQ, Newman CL, Vinarov DA, & Markley JL (2007) Solution structure of human sorting nexin 22. *Protein Sci* 16(5):807-814.
44. Holland P, *et al.* (2016) HS1BP3 negatively regulates autophagy by modulation of phosphatidic acid levels. *Nature communications* 7:13889.
45. Abram CL, *et al.* (2003) The adaptor protein fish associates with members of the ADAMs family and localizes to podosomes of Src-transformed cells. *The Journal of biological chemistry* 278(19):16844-16851.
46. Buschman MD, *et al.* (2009) The novel adaptor protein Tks4 (SH3PXD2B) is required for functional podosome formation. *Molecular biology of the cell* 20(5):1302-1311.
47. Cheng G & Lambeth JD (2004) NOXO1, regulation of lipid binding, localization, and activation of Nox1 by the Phox homology (PX) domain. *The Journal of biological chemistry* 279(6):4737-4742.
48. Cheng G & Lambeth JD (2005) Alternative mRNA splice forms of NOXO1: differential tissue expression and regulation of Nox1 and Nox3. *Gene* 356:118-126.
49. Ueyama T, Lekstrom K, Tsujibe S, Saito N, & Leto TL (2007) Subcellular localization and function of alternatively spliced Nox1 isoforms. *Free Radic Biol Med* 42(2):180-190.
50. Honbou K, *et al.* (2007) Full-length p40phox structure suggests a basis for regulation mechanism of its membrane binding. *EMBO J* 26(4):1176-1186.
51. Kanai F, *et al.* (2001) The PX domains of p47phox and p40phox bind to lipid products of PI(3)K. *Nat Cell Biol* 3(7):675-678.
52. Bravo J, *et al.* (2001) The crystal structure of the PX domain from p40(phox) bound to phosphatidylinositol 3-phosphate. *Mol Cell* 8(4):829-839.
53. Ellson CD, *et al.* (2001) PtdIns(3)P regulates the neutrophil oxidase complex by binding to the PX domain of p40(phox). *Nat Cell Biol* 3(7):679-682.
54. Zhan Y, Virbasius JV, Song X, Pomerleau DP, & Zhou GW (2002) The p40phox and p47phox PX domains of NADPH oxidase target cell membranes via direct and indirect recruitment by phosphoinositides. *The Journal of biological chemistry* 277(6):4512-4518.
55. Stahelin RV, Burian A, Bruzik KS, Murray D, & Cho W (2003) Membrane binding mechanisms of the PX domains of NADPH oxidase p40phox and p47phox. *The Journal of biological chemistry* 278(16):14469-14479.
56. Karathanassis D, *et al.* (2002) Binding of the PX domain of p47(phox) to phosphatidylinositol 3,4-bisphosphate and phosphatidic acid is masked by an intramolecular interaction. *Embo J* 21(19):5057-5068.
57. Hiroaki H, Ago T, Ito T, Sumimoto H, & Kohda D (2001) Solution structure of the PX domain, a target of the SH3 domain. *Nat Struct Biol* 8(6):526-530.

58. Shmelzer Z, *et al.* (2008) Cytosolic phospholipase A2alpha is targeted to the p47phox-PX domain of the assembled NADPH oxidase via a novel binding site in its C2 domain. *The Journal of biological chemistry* 283(46):31898-31908.
59. Takeuchi H, Takeuchi T, Gao J, Cantley LC, & Hirata M (2010) Characterization of PXX as a protein involved in epidermal growth factor receptor trafficking. *Mol Cell Biol*.
60. Hayashi S, *et al.* (2002) Identification and characterization of RPK118, a novel sphingosine kinase-1-binding protein. *The Journal of biological chemistry* 277(36):33319-33324.
61. Xing Y, *et al.* (2004) Structural basis of membrane targeting by the Phox homology domain of cytokine-independent survival kinase (CISK-PX). *The Journal of biological chemistry* 279(29):30662-30669.
62. Xu J, Liu D, Gill G, & Songyang Z (2001) Regulation of cytokine-independent survival kinase (CISK) by the Phox homology domain and phosphoinositides. *J Cell Biol* 154(4):699-705.
63. Virbasius JV, *et al.* (2001) Activation of the Akt-related cytokine-independent survival kinase requires interaction of its phox domain with endosomal phosphatidylinositol 3-phosphate. *Proc Natl Acad Sci U S A* 98(23):12908-12913.
64. Tessier M & Woodgett JR (2006) Role of the Phox homology domain and phosphorylation in activation of serum and glucocorticoid-regulated kinase-3. *The Journal of biological chemistry* 281(33):23978-23989.
65. Chiang SH, *et al.* (2003) TCGAP, a multidomain Rho GTPase-activating protein involved in insulin-stimulated glucose transport. *EMBO J* 22(11):2679-2691.
66. Hayashi T, *et al.* (2007) PX-RICS, a novel splicing variant of RICS, is a main isoform expressed during neural development. *Genes Cells* 12(8):929-939.
67. Parkinson GN, Vines D, Driscoll PC, & Djordjevic S (2008) Crystal structures of PI3K-C2alpha PX domain indicate conformational change associated with ligand binding. *BMC Struct Biol* 8:13.
68. Stahelin RV, *et al.* (2006) Structural and membrane binding analysis of the Phox homology domain of phosphoinositide 3-kinase-C2alpha. *The Journal of biological chemistry* 281(51):39396-39406.
69. Song X, *et al.* (2001) Phox homology domains specifically bind phosphatidylinositol phosphates. *Biochemistry* 40(30):8940-8944.
70. Du G, *et al.* (2003) Regulation of phospholipase D1 subcellular cycling through coordination of multiple membrane association motifs. *J Cell Biol* 162(2):305-315.
71. Stahelin RV, *et al.* (2004) Mechanism of membrane binding of the phospholipase D1 PX domain. *The Journal of biological chemistry* 279(52):54918-54926.
72. Lee JS, *et al.* (2005) Phosphatidylinositol (3,4,5)-trisphosphate specifically interacts with the phox homology domain of phospholipase D1 and stimulates its activity. *Journal of cell science* 118(Pt 19):4405-4413.
73. Schaff UY, *et al.* (2008) SLIC-1/sorting nexin 20: a novel sorting nexin that directs subcellular distribution of PSGL-1. *Eur J Immunol* 38(2):550-564.
74. Blatner NR, *et al.* (2007) The structural basis of novel endosome anchoring activity of KIF16B kinesin. *EMBO J* 26(15):3709-3719.
75. Hoepfner S, *et al.* (2005) Modulation of receptor recycling and degradation by the endosomal kinesin KIF16B. *Cell* 121(3):437-450.
76. Pyrpassopoulos S, Shuman H, & Ostap EM (2017) Adhesion force and attachment lifetime of the KIF16B-PX domain interaction with lipid membranes. *Molecular biology of the cell* 28(23):3315-3322.

77. Danson C, *et al.* (2013) SNX15 links clathrin endocytosis to the PtdIns3P early endosome independently of the APPL1 endosome. *Journal of cell science* 126(Pt 21):4885-4899.
78. Lim KP & Hong W (2004) Human Nischarin/imidazoline receptor antisera-selected protein is targeted to the endosomes by a combined action of a PX domain and a coiled-coil region. *The Journal of biological chemistry* 279(52):54770-54782.
79. Xu J, *et al.* (2017) SNX16 Regulates the Recycling of E-Cadherin through a Unique Mechanism of Coordinated Membrane and Cargo Binding. *Structure* 25(8):1251-1263 e1255.
80. Choi JH, *et al.* (2004) Sorting nexin 16 regulates EGF receptor trafficking by phosphatidylinositol-3-phosphate interaction with the Phox domain. *Journal of cell science* 117(Pt 18):4209-4218.

**Supplementary Table 2.** PX domain constructs used in this study.

| PX domain              | Sequence                                                                                                                                                          | Cloned into pGEX4T-2 | Successful purification |
|------------------------|-------------------------------------------------------------------------------------------------------------------------------------------------------------------|----------------------|-------------------------|
| HS1BP3<br>(17-139)     | TGLDLTVPQHQEVVRGKMMSGHVEYQILVV<br>TRLAAFSAKHRPEDVVQFLVSKKYSEIEEF<br>YQKLSSRYAAASLPPLPRKVLVFGESDIRER<br>RAVFNEILRCVSKDAELAGSPELLEFLGTRS                            | Yes                  | Yes                     |
| IRAS<br>(13-124)       | AEPAKEARVVGSELVDTYTVYIIQVTDGSHE<br>WTVKHRYSDFHDLHEKLV AERKIDKNLLPP<br>KKIIGKNSRSLVEKREKDLEVYLQKLLAAF<br>GVTPRVLAHFLHFHFYEING                                      | Yes                  | Yes                     |
| p40phox<br>(1-144)     | MAVAQQLRAESDFEQLPDDVAISANIADIEE<br>KRGFTSHFVVFVIEVKTKGGSKYLIYRRYRQF<br>HALQSKLEERFGPDSKSSALACTLPTLPAKV<br>YVGVKQEIAEMRIPALNAYMKSLLSLPVVW<br>LMDEDVRIFFYQSPYDSEQVP | Yes                  | Yes                     |
| p47phox<br>(1-122)     | MGDTFIRHIALLGFEKRFVPSQHYVYMFLV<br>KWQDLSEKVVYRRFTEIYEFHKTLKEMFPIE<br>AGAINPENRIIPLPAPKWFDGQRAAENRQG<br>TLTEYCGTLMMLPTKISRCPHLLDFKVRP                              | Yes                  | Yes                     |
| PI3KC2A<br>(1405-1545) | DEPILSFSPKTYSFQRDGRIVEVSVFTYHKKY<br>NPDKHYYVVRILREGQIEPSFVFRTFDEFQE<br>LHNKLSIIFPLWKLPGFPNRMVLRTHIKDV<br>AAKRKIELNSYLQSLMNASTDVAECDLVCT<br>FFHPLLRDEKAEGIA        | Yes                  | Yes                     |
| PI3KC2B<br>(1348-1487) | DRLTLSFASRTHTLKSSGRISDVFLCRHEKIF<br>HPNKGYYVVKVMRENTHEATYIQRTFEEF<br>QELHNKLRLLPSSHLPSFSPRFVIGRSRGEA<br>VAERRREELNGYIWHLIHAPPEVAECDLVY<br>TFFHPLPRDEKAMGTS        | Yes                  | Yes                     |
| PI3KC2G<br>(1200-1310) | STTRSIERATILGFSKKSSNLYLIQVTHSNNE<br>TSLTEKSFEQFSKLHSQKQFASLTLPEFPH<br>WWHLPFTNSDHRRFRDLNHYMEQILNVSH<br>EVTNSDCVLSFFLSEAVQ                                         | Yes                  | Yes                     |
| PLD1<br>(80-211)       | PIKAQVLEVERFTSTTRVPSINLYTIELTHGE<br>FKWQVKRKFQHFQEFHRELLKYKAFIRIPI<br>TRRHTFRRQNVREEPREMPSPRSENMI<br>EQFLGRKQLEDYLT KILKMPMYRNYHATT<br>EFLDISQL                   | Yes                  | No                      |
| PLD2<br>(61-191)       | PGVPVTAQVVGTERYTSKSGVGTCTLYSVR<br>LTHGDFSWTTKKKYRHFQELHRDLLRHKV<br>LMSLLPLARFAVAYSPARDAGNREMPSPR<br>AGPEGSTRHAASKQKYLENYLNRLLTMSFY<br>RNYHAMTEFLEV                | Yes                  | No                      |
| PXK<br>(1-125)         | MAFMEKPPAGKVLLDDTVPLTAAIEASQSL<br>QSHTEYIIRVQRGISVENSQIVRRYSDFDL<br>NNSLQIAGLSLPLPPKLLIGNMDREFIAERQ<br>KGLQNYLNVITTNHILSNCELVKKFLDPNNY<br>S                       | Yes                  | Yes                     |
| PXRICS<br>(127-255)    | NVEFGSIQSLSEEQNEVMKNGCESKELVYL<br>VQIACQGKSWIVKRSYEDFRVLDKHLHLCI<br>YDRRFSQSELPRSDTLKDSPEVSTQMLMA<br>YLSRLSAIAGNKINCGPALTWMEIDNKG<br>LLVHEESS                     | Yes                  | Yes                     |
| RPS6KC1<br>(1-141)     | MTSYRERSADLARFYTVTEPQRHPRGYTVY<br>KV TARVVSRNPEDVQEIIVWKRYSDFKKL<br>HKELWQIHKNLFRHSELFPFPAKGIVFGRFD                                                               | Yes                  | Yes                     |

|                     |                                                                                                                                                                                                                             |     |     |
|---------------------|-----------------------------------------------------------------------------------------------------------------------------------------------------------------------------------------------------------------------------|-----|-----|
|                     | ETVIEERRQCAEDLLQFSANIPALYNSKQLE<br>DFFKGGIINDSSELIGPAE                                                                                                                                                                      |     |     |
| SGK3<br>(1-126)     | MQRDHTMDYKESCPSVSIPSSDEHREKKKR<br>FTVYKVLVSVGRSEWVFRRYAEFDKLYNT<br>LKKQFPAMALKIPAKRIFGDNFDPDFIKQRR<br>AGLNEFIQNLVRYPELYNHPDVRAFLQMDS<br>PKHQS                                                                               | Yes | Yes |
| SH3PXD2A<br>(1-126) | MLAYCVQDATVVDVEKRRNPSKHVYIIN<br>VTWSDSTSQTIYRRYSKFFDLQMQLLDFPI<br>EGGQKDPKQRIIPFLPGKILFRRSHIRDVAVK<br>RLKPIDEYCRALVRLPPHISQCDEVFRFFEAR<br>P                                                                                 | Yes | Yes |
| SH3PXD2B<br>(1-125) | MPPRRSIVEVKVLDVQKRRVVPNKHYVYIIR<br>VTWSSGSTEAIYRRYSKFFDLQMQLLDFPI<br>MEGGQKDPKQRIIPFLPGKILFRRSHIRDVAVK<br>KRLPIDEYCKALIQLPPYISQCDEVLQFFET                                                                                   | No  | No  |
| SNX1<br>(142-269)   | QFDLTVGITDPEKIGDGMNAYVAYKVTQT<br>SLPLFRSKQFAVKRRFSDFLGLYEKLSEKHS<br>QNGFIVPPPPEKSLIGMTKVKVKGEDSSSAE<br>FLEKRAALERYLQRIVNHPTMLQDPDVRE<br>FLEKEE                                                                              | Yes | Yes |
| SNX10<br>(1-201)    | MFPEQQKEEFVSVWVRDPRIQKEDFWHSYI<br>DYEICHTNSMCFMKTSCVRRRYREFVWL<br>RQRLQSNALLVQLPELPSKNLFFNMNRQH<br>VDQRRQGLEDFLRKVLQNALLSDSSLHLF<br>LQSHLNSDIEACVSGQTKYSVEEAIHKFAL<br>MNRFPPEDEEGKKENDIDYDSESSSSGLGH<br>SSDDSSSHGCKVNTAPQES | Yes | Yes |
| SNX11<br>(7-167)    | MSENQEQUEVITVRVQDPRVQNEGSWNSY<br>VDYKIFLHTNSKAFTAKTSCVRRRYREFVW<br>LRKQLQRNAGLVPPELPGKSTFFGTSDDEFI<br>EKRRQGLQHFLEKVLQSVVLLSDSQLHLFL<br>QSQLSVPEIEACVQGRSTMTVSDAILRYAMS<br>NCGWAQEERQ                                       | Yes | Yes |
| SNX12<br>(1-162)    | MSDTAVADTRRLNSKPQDLTDAYGPPSNFL<br>EIDIFNPQTVGVGRARFTTYEVRMRTNLPIF<br>KLKESCVRRRYSDFEWLKNELERDSKIVVPP<br>LPGKALKRQLPFRGDEGIFEEFIEERRQGLE<br>QFINKIAGHPLAQNERCLHMFLQEEAIDRNY<br>VPGKVRQ                                       | Yes | Yes |
| SNX13<br>(1-100)    | SDDSVQLHAYISDTGVCNDHGKTYALYAIT<br>VHRRNLNSEEMWKTYRRYSDFHDFHMRIT<br>EQFESLSSILKLPGKKTFFNMMDRDFLEKRKK<br>DLNAYLQLLLAPEMMKASPALAHYVYDFL<br>ENK                                                                                 | Yes | Yes |
| SNX14<br>(561-686)  | NLAAWKISIPYVDFDFEDPSSERKEKKERIPVF<br>CIDVERNDRRAVGHEPEHWSVYRRYLEFYV<br>LESKLTEFHGAFPDAQLPSKRIIGPKNYEFLK<br>SKREEFQEYLQKLLQHPELSNSQLLADFLSP<br>N                                                                             | Yes | Yes |
| SNX15<br>(1-127)    | MSRQAKDDFLRHYTVSDPRTHPKGYTEYK<br>VTAQFISKKDPEDVKEVVVWKRYSDFRKLH<br>GDLAYTHRNLFRLEEFPAFPRAQVFGRFEA<br>SVIEERRKGAEDLLRFTVHIPALNNSPQLKEF<br>FRGG                                                                               | Yes | Yes |
| SNX16<br>(104-216)  | EDRPSTPTILGYEVMERAKFTVYKILVKKT<br>PEESWVFRRYTDFSRNLNDKLEMFPGFRL<br>ALPPKRWFKDNYNADFLEDRQLGLQAFLQ<br>NLVAHKDIANCLAVREFLCLDDP                                                                                                 | Yes | Yes |

|                      |                                                                                                                                                                 |     |     |
|----------------------|-----------------------------------------------------------------------------------------------------------------------------------------------------------------|-----|-----|
| SNX17<br>(1-111)     | MHFSIPETESRSGDSGGSSAYVAYNIHVNGVL<br>HCRVRYSQLLGLHEQLRKEYGANVLPAPFP<br>KKLFSLTPAEVEQRREQLKYMQAVRQDPL<br>LGSSETFNSFLRRAQQETQQ                                     | Yes | Yes |
| SNX18<br>(271-403)   | ENPYPFQCTIDDPTKQTKFKGMKSYISYKLV<br>PTHTQVPVHRRYKHFDWLYARLAEKFPVIS<br>VPHLPEKQATGRFEEDFISKRRKGLIWWMN<br>HMASHPVLAQCDVFQHFLTCPSSSTDEKAW<br>KQGKRKAEKDEMV          | Yes | No  |
| SNX19<br>(1-100)     | NLRITGITAREHSGTGFHPYTLTYTVKYETA<br>LDGENSSGLQQLAYHTVNRRYREFLNLQTR<br>LEEKPDRLRFIKNVKGPCKLFPDLPGNMDS<br>DRVEARKSLLESFLKQLCAIPEIANSEEVQEF<br>LAL                  | Yes | Yes |
| SNX2<br>(136-279)    | NGDIFDIEIGVSDPEKVGDMNAYMAYRVT<br>TKTSLSMFSKSEFSVKKRRFSDFLGLHSLAS<br>KYLHVGYIVPPAPEKSIVGMTKVKVKGKEDS<br>SSTEFVEKRRALERYLQRTVKHPTLLQDP<br>DLRQFLESSELPRAVNTQALSGA | Yes | Yes |
| SNX20<br>(71-184)    | WKHVKLLFEIASARIEERKVSFVVYQIIVIQ<br>TGSFDNNKAVLERRYSDFAKLQKALLKTFR<br>EEIEDVEFPRKHLTGNFAEEMICERRRALQE<br>YLGLLYAIRCVRRSREFLDFL                                   | Yes | No  |
| SNX21<br>(130-251)   | RLLFEVTSANVVKDPPSKYVLYTLAVIGPGP<br>PDCQPAQISRRYSDFERLHRNLQRQFRGPM<br>AAISFPRKRLRRNFTAETIARRSRAFEQFLGH<br>LQAVPELRHAPDLQDFFVLPELRRASLT                           | Yes | No  |
| SNX22<br>(1-120)     | MLEVHIPSVGPEAEGPRQSPEKSHMVFVRVE<br>VLCGRRHTVPRRYSEFHALHKRIKKLYKV<br>PDFPSKRLPNWRTRGLEQRRQGLEAYIQGIL<br>YLNQEVPKELLEFLRLRHFPDTPKASNWG                            | Yes | Yes |
| SNX23<br>(1178-1312) | DLKDPIKISIPRYVLCGQKDAHFEFVKITV<br>LDETWTVFRRYSRFREMHKTLKLYAELA<br>ALEFPPKKLFGNKDERVIAERRSHLEKYLRD<br>FFSVMQLSATSPLHINKVGLTLKHTICEFSP<br>FFKKGVDYS               | Yes | Yes |
| SNX24<br>(1-101)     | MEVYIPSRFYEESDLERGYTVFKIEVLMNGR<br>KHVFEKRYSEFHALHKKLCKIKTPEIPSKH<br>VRNWVPKVLEQRRQGLETYLQAVILENEEL<br>PKLFLDFLN                                                | Yes | Yes |
| SNX25<br>(506-628)   | NLGMWKASITSGEVTEENGEQLPCYFVMVS<br>LQEVGGVETKNWTVPRRLSEFQNLHRKLSE<br>CVPSLKKVQLPSLSKLPFKSIDQKFMESKN<br>QLNKFLQNLSDERLCQSEALYAFLSPSPDY<br>L                       | Yes | Yes |
| SNX26<br>(56-172)    | NVDFGHIQLLLSPDREGPSLSGENELVFGVQ<br>VTCQGRSWPVLRSYDDFRSLDAHLHRCIFD<br>RRFSCLPELPPPPEGARAAQMLVPLLLQYLE<br>TLSGLVDSNLNCGPVLTMELDNHG                                | Yes | Yes |
| SNX27<br>(156-265)   | DYTEKQAVPISVPRYKHVEQNGEKFVVYNV<br>YMAGRQLCSKRYREFAILHQNLKREFANFT<br>FPRLPGKWPFSLSEQQLDARRRGLEEYLEK<br>VCSIRVIGESDIMQEFLSES                                      | Yes | Yes |
| SNX28<br>(1-124)     | MAGPRYPVSVQGAALVQIKRLQTFASVRW<br>SDGSDTFVRRSWDEFRQLKTLKETFPVEAG<br>LLRRSDRVLPKLLDAPLLGRVGRTRSGLAR<br>LQLETTYSRLLATAERVARSPITITGFFAPQP<br>LD                     | Yes | Yes |

|                    |                                                                                                                                                                         |     |     |
|--------------------|-------------------------------------------------------------------------------------------------------------------------------------------------------------------------|-----|-----|
| SNX29<br>(269-391) | NRALINWVIPSVFLRGKAANAFHVYQVYIRI<br>KDDEWNIYRRYTEFRSLHHKLQNKYPQVR<br>AYNFPPKKAIGNKDAKFVEERRKQLQNYLR<br>SVMNKVIQMVPEFAASPKKETLIQLMPFFV<br>DIT                             | Yes | Yes |
| SNX3<br>(21-151)   | AYGPPSNFLEIDVSNPQTVGVGRGRFTTYEI<br>RVKTNLPIFKLKESTVRRRYSDFEWLRSELE<br>RESKVVPPLPGKAFLRQLPFRGDDGIFDDN<br>FIEERKQGLEQFINKVAGHPLAQNERCLHMF<br>LQDEIID                      | Yes | Yes |
| SNX30<br>(86-205)  | GETRDLFVIVDDPKKHVCTMETYITYRITTK<br>STRVEFDLPEYSVRRRYQDFDWLRSKLEES<br>QPTHLIPPLPEKFVVKGVVDRFSEEFVETRR<br>KALDKFLKRITDHPVLSFNEHFNIFLTA                                    | No  | No  |
| SNX31<br>(1-106)   | MKMHFCIPVSQQRSDALGGRYVLYSVHLD<br>GFLFCRVRYSQLHGWNEQLRRVFGNCLPPF<br>PPKYLLAMTTAMAHERRDQLEQYLQNVTM<br>DPNVLRSDVFVEFLKLAQ                                                  | Yes | Yes |
| SNX32<br>(17-166)  | SVDLQGDSSLQVEISDAVSEKDKVKFTVQT<br>KSCLPHFAQTEFSVVRQHEEFIWLHDAYVE<br>NEEYAGLIIPPAPRPDFAEASREKLQKLGEED<br>SSVTREEFAKMKQELEAEYLAIFKKTVMAMH<br>EVFLQRLAAHPTLRDRDNFFVFLEYGQD | Yes | Yes |
| SNX33<br>(220-364) | GPQWKANPHPFACSVEDPTKQTKFKGKISYI<br>SYKLTPTHAASPVYRRYKHFWDWLYNRLLH<br>KFTVISVPHLPEKQATGRFEEDFIEKRKRRLI<br>LWMDHMTSHPVLSQYEGFQHFLSCLDDKQ<br>WKMGKRRAEKDEMVGASFLLTQFI      | No  | No  |
| SNX34<br>(1-130)   | MASAVFEGTSLVNMFVRGCWVNGIRRLIVS<br>RRGDEEEFFEIRTEWSDRSVLYLHRSLADLG<br>RLWQRLRDAFPEDRSELAQGPLRQGLVAIK<br>EAHDIETRLNEVEKLLKTIISMPCKYSRSEVV<br>LTFERS                       | Yes | No  |
| SNX4<br>(48-186)   | MTHNNFWLKKIEISVSEAEKRTGRNAMNM<br>QETYTAYLIETRSVEHTDGQSVLTDLWRR<br>YSEFELLRSYLLVYYPHIVVPLPEKRAEFV<br>WHKLSADNMDPDFVERRRIGLENFLLRIAS<br>HPILCRDKIFYLFLTQEGN               | Yes | Yes |
| SNX5<br>(26-170)   | SVDLNVDPQLIDIPDALSERDKVKFTVHTK<br>TTLPTFQSPEFSVTRQHEDFVWLHDTLIETT<br>DYAGLIIPPAPTKPDFDGPREKMQKLGEGEG<br>SMTKEEFAKMKQELEAEYLAVFKKTVSSHE<br>VFLQRLSSHVPVLSKDRNFHFVLEYDQ   | Yes | Yes |
| SNX6<br>(29-170)   | QSDAALQVDISDALSERDKVKFTVHTKSSLP<br>NFKQNEFSVVRQHEEFIWLHDSFVENEDYA<br>GYIIPPAPRPDASREKLQKLGEGEGSMT<br>KEEFTKMKQELEAEYLAIFKKTVMAMHEVFL<br>CRVAHPILRRDLNFHFVLEYNQ          | Yes | Yes |
| SNX7<br>(89-218)   | DEPDLKDLFITVDEPESHVTTIETFITRYITK<br>TSRGEFDSSEFEVRRRYQDFLWLKGGLEEA<br>HPTLIIPPLPEKFIVKGMVERFNDDFIETRRK<br>ALHKFLNRIADHPTLTFNEDFKIFLTAQAW<br>LSSH                        | Yes | Yes |
| SNX8<br>(70-190)   | ELLARDTVQVELIPEKKGLFLKHVEYEVSSQ<br>RFKSSVYRRYNDVVFQEMLLHKFPYRMVP<br>ALPPKRMLGADREFIEARRALKRFVNLVA<br>RHPLFSEDVVLKFLSFSGSDVQNKLKESA                                      | Yes | No  |
| SNX9<br>(246-376)  | PTSTFDCVVADPRKGSKMYGLKSYIEYQLT<br>PTNTNRSVNHRYKHFWDWLYERLLVKFGSAI<br>PIPSLPDKQVTGRFEEEFIKMRMERLQAWM                                                                     | Yes | Yes |

---

TRMCRHPVISESEVFQQFLNFRDEKEWKTG  
KRKAERDELAK

---

46/49

39/49

---

**Supplementary Table 3.** Primers used in this study for site-directed mutagenesis of PX domains

| <b>Mutation</b>                 | <b>Forward Primer</b>                          | <b>Reverse Primer</b>                          |
|---------------------------------|------------------------------------------------|------------------------------------------------|
| SNX1<br>Y194A/K196A/K200A       | CTGGGTCTGGCCGAGGCGCTGAG<br>CGAAGCACACAGCCAA    | TTGGCTGTGTGCTTCGCTCAGCG<br>CCTCGGCCAGACCCAG    |
| SNX1<br>K213A                   | CCGCCGCCGCCGAGGCGAGCCT<br>GATTGGTATG           | CATACCAATCAGGCTCGCCTCCG<br>GCGGCGGCGG          |
| SNX2<br>H187A/K189A/K193A       | CTGGGTCTGGCCAGCGCGCTGGC<br>GAGCGCATACCTGCAC    | GTGCAGGTATGCGCTCGCCAGCG<br>CGCTGGCCAGACCCAG    |
| SNX9<br>Y290A/R292A/K296A       | GATTGGCTGGCCGAAGCTCTGCTG<br>GTGGCGTTTGGCAGT    | ACTGCCAAACGCCACCAGCAGAG<br>CTTCGGCCAGCCAATC    |
| SNX15<br>H59A                   | GATTTTCGCAAACCTGGCTGGCGAC<br>CTGGCCTAC         | GTAGGCCAGGTCGCCAGCCAGTT<br>TGCGAAAATC          |
| SNX15<br>Y64A/R67A/R71A/R72A    | CTGGCCGCCACGCACGCTAACCTG<br>TTCGCTGCCCTGGAA    | TTCCAGGGCAGCGAACAGGTTAG<br>CGTGCGTGGCGGCCAG    |
| SNX23<br>H1224A/K1228A/K1230A   | CGCGAAATGGCTAAAACGCTGGC<br>ACTGGCGTACGCCGAA    | TTCGGCGTACGCCAGTGCCAGCG<br>TTTTAGCCATTTTCGGC   |
| SNX24<br>H46A/K50A              | GAATTTACGCGCTGGCCAAGAA<br>ACTGGCGAAATGCATCAAG  | CTTGATGCATTTCCGCCAGTTTCT<br>GGCCAGCGCGTGAAATTC |
| SNX25<br>H720A                  | CAGAACCTGGCTCGCAAACCTG                         | CAGTTTGCGAGCCAGGTTCTG                          |
| SNX25<br>H558A/K560A            | TTTCAAAATCTGGCTCGTGCACTG<br>TCAGAATGC          | GCATTCTGACAGTGACAGGCCA<br>GATTTTGAAA           |
| SNX29<br>H315A/K317A/K321A      | CGTAGTCTGGCTCACGCACTGCAG<br>AACGCGTATCCGCAA    | TTGCGGATACGCGTTCTGCAGTG<br>CGTGAGCCAGACTACG    |
| p47 <sup>phox</sup><br>R44A     | GTGGTTTATCGTGCCTTCACCGAA<br>ATC                | GATTCGGTGAAGGCACGATAAA<br>CCAC                 |
| p47 <sup>phox</sup>             | GAAATCTACGAATTTGCTAAGAC<br>GCTGGCGGAAATGTTTCCG | CGGAAACATTTCCGCCAGCGTCT<br>TAGCAAATTCGTAGATTTT |
| SGK3<br>Y47A/K51A/K52A          | GATAAGCTGGCCAACACGCTGGC<br>AGCGCAGTTTCCG       | CGGAAACTGCGCTGCCAGCGTGT<br>TGGCCAGCTTATC       |
| PI3K2 $\alpha$<br>H1453A/K1455A | CAAGAACTGGCTAACGCACTGTC<br>CATT                | AATGGACAGTGCGTTAGCCAGTT<br>CTTG                |

**Supplementary Table 4.** ITC binding parameters measured for selected PX domains<sup>a</sup>

|                            | Cell Conc. ( $\mu\text{M}$ ) | Syr. Conc. ( $\mu\text{M}$ ) | $K_d$ ( $\mu\text{M}$ ) | $\Delta H$ (kcal/mol) | $\Delta G$ (kcal/mol) | $-T\Delta S$ (kcal/mol) | N               |
|----------------------------|------------------------------|------------------------------|-------------------------|-----------------------|-----------------------|-------------------------|-----------------|
| <b>PX + PtdIns3P</b>       |                              |                              |                         |                       |                       |                         |                 |
| SNX1 + PtdIns3P            | 20                           | 500                          | NB                      | NB                    | NB                    | NB                      | NB              |
| SNX2 + PtdIns3P            | 20                           | 500                          | NB                      | NB                    | NB                    | NB                      | NB              |
| SNX3 + PtdIns3P            | 20                           | 500                          | 15.0 $\pm$ 2.24         | -10.7 $\pm$ 0.75      | -6.58                 | 4.11                    | 1.40 $\pm$ 0.12 |
| SNX4 + PtdIns3P            | 20                           | 500                          | 28.8 $\pm$ 2.16         | -3.53 $\pm$ 0.13      | -5.97                 | -2.47                   | 0.87 $\pm$ 0.09 |
| SNX5 + PtdIns3P            | 20                           | 500                          | NB                      | NB                    | NB                    | NB                      | NB              |
| SNX6 + PtdIns3P            | 20                           | 500                          | NB                      | NB                    | NB                    | NB                      | NB              |
| SNX7 + PtdIns3P            | 20                           | 500                          | 14.2 $\pm$ 2.14         | -12.6 $\pm$ 1.12      | -6.62                 | 6.02                    | 1.25 $\pm$ 0.13 |
| SNX9 + PtdIns3P            | 20                           | 500                          | 1.56 $\pm$ 0.25         | -15.0 $\pm$ 2.31      | -7.92                 | -7.09                   | 0.75 $\pm$ 0.11 |
| SNX10 + PtdIns3P           | 20                           | 500                          | 31.8 $\pm$ 2.25         | -4.35 $\pm$ 0.31      | -5.63                 | -1.93                   | 0.80 $\pm$ 0.07 |
| SNX11 + PtdIns3P           | 20                           | 500                          | 4.30 $\pm$ 0.67         | -5.99 $\pm$ 0.34      | -7.32                 | -1.33                   | 0.93 $\pm$ 0.10 |
| SNX12 + PtdIns3P           | 20                           | 500                          | 24.6 $\pm$ 5.10         | -19.7 $\pm$ 7.73      | -6.29                 | 13.4                    | 1.03 $\pm$ 0.19 |
| SNX13 + PtdIns3P           | 20                           | 500                          | 15.6 $\pm$ 4.37         | -15.7 $\pm$ 4.36      | -6.56                 | 9.13                    | 0.75 $\pm$ 0.15 |
| SNX14 + PtdIns3P           | 20                           | 500                          | NB                      | NB                    | NB                    | NB                      | NB              |
| SNX15 + PtdIns3P           | 20                           | 500                          | 11.9 $\pm$ 2.2          | -1.81 $\pm$ 0.5       | -0.72                 | -4.92                   | 1.15 $\pm$ 0.10 |
| SNX16 + PtdIns3P           | 20                           | 500                          | 16.3 $\pm$ 2.13         | -2.62 $\pm$ 0.23      | -6.61                 | -3.57                   | 0.89 $\pm$ 0.07 |
| SNX17 + PtdIns3P           | 20                           | 500                          | 12.7 $\pm$ 4.06         | -1.11 $\pm$ 0.17      | -6.68                 | -5.57                   | 1.00 $\pm$ 0.11 |
| SNX19 + PtdIns3P           | 20                           | 500                          | 13.0 $\pm$ 2.80         | -10.2 $\pm$ 0.98      | -6.67                 | 3.54                    | 1.5 $\pm$ 0.17  |
| SNX22 + PtdIns3P           | 20                           | 500                          | 16.5 $\pm$ 2.76         | -16.0 $\pm$ 2.14      | -6.53                 | 9.51                    | 0.96 $\pm$ 0.11 |
| SNX23 + PtdIns3P           | 20                           | 500                          | 0.79 $\pm$ 0.40         | 1.77 $\pm$ 0.12       | -8.45                 | -10.2                   | 1.30 $\pm$ 0.15 |
| SNX24 + PtdIns3P           | 20                           | 500                          | 2.41 $\pm$ 0.50         | -1.42 $\pm$ 0.85      | -7.67                 | -6.25                   | 1.00 $\pm$ 0.10 |
| SNX25 + PtdIns3P           | 20                           | 500                          | NB                      | NB                    | NB                    | NB                      | NB              |
| SNX27 + PtdIns3P           | 20                           | 500                          | 11.4 $\pm$ 2.27         | -10.1 $\pm$ 0.85      | -6.75                 | 3.31                    | 1.54 $\pm$ 0.08 |
| SNX29 + PtdIns3P           | 20                           | 500                          | 2.70 $\pm$ 0.20         | -8.03 $\pm$ 0.21      | -7.60                 | 0.43                    | 1.03 $\pm$ 0.05 |
| SNX31 + PtdIns3P           | 20                           | 500                          | 12.7 $\pm$ 4.06         | -1.11 $\pm$ 0.17      | -6.68                 | -5.57                   | 1.00 $\pm$ 0.08 |
| SNX32 + PtdIns3P           | 20                           | 500                          | NB                      | NB                    | NB                    | NB                      | NB              |
| SGK3 + PtdIns3P            | 20                           | 500                          | 1.74 $\pm$ 0.11         | -14.8 $\pm$ 0.17      | -7.86                 | 6.96                    | 1.35 $\pm$ 0.11 |
| PI3KC2 $\alpha$ + PtdIns3P | 20                           | 500                          | NB                      | NB                    | NB                    | NB                      | NB              |
| PI3KC2 $\beta$ + PtdIns3P  | 20                           | 500                          | NB                      | NB                    | NB                    | NB                      | NB              |
| PI3KC2 $\gamma$ + PtdIns3P | 20                           | 500                          | NB                      | NB                    | NB                    | NB                      | NB              |
| p40phox + PtdIns3P         | 20                           | 500                          | 9.72 $\pm$ 1.66         | -9.60 $\pm$ 1.09      | -6.84                 | -2.76                   | 0.85 $\pm$ 0.15 |
| p47phox + PtdIns3P         | 20                           | 500                          | 11.7 $\pm$ 1.82         | -5.60 $\pm$ 1.09      | -6.28                 | -2.83                   | 0.90 $\pm$ 0.13 |

|                     |    |     |             |              |       |       |             |
|---------------------|----|-----|-------------|--------------|-------|-------|-------------|
| IRAS + PtdIns3P     | 20 | 500 | 2.60 ± 0.65 | -9.2 ± 1.38  | -7.62 | 1.55  | 0.65 ± 0.11 |
| RPS6KC1 + PtdIns3P  | 20 | 500 | 1.91 ± 0.43 | -0.55 ± 0.03 | -7.80 | -7.25 | 0.75 ± 0.09 |
| SH3PXD2A + PtdIns3P | 20 | 500 | 35.0 ± 3.60 | -4.11 ± 0.39 | -5.36 | -1.81 | 0.88 ± 0.10 |
| PXK + PtdIns3P      | 20 | 500 | 13.0 ± 2.80 | -10.2 ± 0.98 | -6.67 | 3.54  | 1.5 ± 0.07  |
| RICS + PtdIns3P     | 20 | 500 | 25.7 ± 8.94 | -3.38 ± 1.12 | -6.25 | -3.29 | 1.12 ± 0.11 |

| <b>PX + PtdIns(3,4)P<sub>2</sub></b> |    |     |             |              |       |       |             |
|--------------------------------------|----|-----|-------------|--------------|-------|-------|-------------|
| SNX1 + PtdIns(3,4)P <sub>2</sub>     | 20 | 500 | 5.61 ± 0.98 | -1.22 ± 0.11 | -7.16 | -5.94 | 0.96 ± 0.08 |
| SNX2 + PtdIns(3,4)P <sub>2</sub>     | 20 | 500 | 6.35 ± 1.27 | -2.80 ± 0.8  | -7.09 | -4.30 | 1.00 ± 0.10 |
| SNX9 + PtdIns(3,4)P <sub>2</sub>     | 20 | 500 | 9.6 ± 2.5   | -3.76 ± 0.26 | -6.61 | -3.67 | 0.87 ± 0.10 |
| SNX13 + PtdIns(3,4)P <sub>2</sub>    | 20 | 500 | 16.5 ± 2.76 | -16.0 ± 2.14 | -6.53 | 9.51  | 0.96 ± 0.10 |
| SNX15 + PtdIns(3,4)P <sub>2</sub>    | 20 | 500 | 2.13 ± 0.67 | -2.61 ± 0.28 | -7.74 | -5.13 | 0.85 ± 0.11 |
| SNX17 + PtdIns(3,4)P <sub>2</sub>    | 20 | 500 | NB          | NB           | NB    | NB    | NB          |
| SNX23 + PtdIns(3,4)P <sub>2</sub>    | 20 | 500 | 1.23 ± 0.69 | -1.66 ± 0.17 | -8.06 | -6.40 | 0.85 ± 0.09 |
| SNX24 + PtdIns(3,4)P <sub>2</sub>    | 20 | 500 | 4.24 ± 1.11 | -3.88 ± 0.25 | -7.33 | -3.45 | 1.51 ± 0.07 |
| SNX25 + PtdIns(3,4)P <sub>2</sub>    | 20 | 500 | 304 ± 10.6  | -80 ± 5.28   | -4.56 | 75.4  | 0.65 ± 0.14 |
| SNX27 + PtdIns(3,4)P <sub>2</sub>    | 20 | 500 | NB          | NB           | NB    | NB    | NB          |
| SNX29 + PtdIns(3,4)P <sub>2</sub>    | 20 | 500 | 4.45 ± 0.74 | -6.22 ± 0.55 | -7.30 | -1.08 | 0.65 ± 0.09 |
| SGK3 + PtdIns(3,4)P <sub>2</sub>     | 20 | 500 | 13.2 ± 4.5  | -6.94 ± 2.74 | -6.66 | 0.28  | 0.85 ± 0.12 |
| PI3KC2α + PtdIns(3,4)P <sub>2</sub>  | 20 | 500 | 8.79 ± 1.45 | -0.56 ± 0.13 | -6.90 | -6.34 | 0.65 ± 0.09 |
| p47phox + PtdIns(3,4)P <sub>2</sub>  | 20 | 500 | 22.7 ± 8.94 | -3.31 ± 1.02 | -6.34 | -3.03 | 1.22 ± 0.11 |
| IRAS + PtdIns(3,4)P <sub>2</sub>     | 20 | 500 | 3.15 ± 0.95 | -0.63 ± 0.05 | -7.51 | -6.88 | 1.04 ± 0.10 |
| RPS6KC1 + PtdIns(3,4)P <sub>2</sub>  | 20 | 500 | 1.06 ± 0.20 | -2.55 ± 0.12 | -8.15 | -5.60 | 0.80 ± 0.06 |

| <b>PX + PtdIns(3,5)P<sub>2</sub></b> |    |     |             |              |       |       |             |
|--------------------------------------|----|-----|-------------|--------------|-------|-------|-------------|
| SNX1 + PtdIns(3,5)P <sub>2</sub>     | 20 | 500 | 42.0 ± 3.70 | -4.08 ± 0.33 | -5.97 | -1.89 | 0.78 ± 0.08 |
| SNX2 + PtdIns(3,5)P <sub>2</sub>     | 20 | 500 | 35.8 ± 3.36 | -3.73 ± 0.27 | -6.07 | -2.33 | 0.82 ± 0.10 |
| SNX23 + PtdIns(3,5)P <sub>2</sub>    | 20 | 500 | 11.5 ± 2.76 | -16.0 ± 2.14 | -6.53 | 9.51  | 0.96 ± 0.12 |
| SNX25 + PtdIns(3,5)P <sub>2</sub>    | 20 | 500 | 12.1 ± 1.25 | -16.8 ± 1.29 | -6.38 | 10.5  | 0.85 ± 0.11 |

| <b>PX + PtdIns(4,5)P<sub>2</sub></b> |    |     |             |              |       |       |             |
|--------------------------------------|----|-----|-------------|--------------|-------|-------|-------------|
| SNX1 + PtdIns(4,5)P <sub>2</sub>     | 20 | 500 | 11.4 ± 2.34 | -4.46 ± 0.42 | -6.75 | -2.28 | 1.00 ± 0.09 |
| SNX2 + PtdIns(4,5)P <sub>2</sub>     | 20 | 500 | 13.6 ± 2.5  | -2.76 ± 0.26 | -6.64 | -3.88 | 0.85 ± 0.10 |
| SNX5 + PtdIns(4,5)P <sub>2</sub>     | 20 | 500 | NB          | NB           | NB    | NB    | NB          |

|                                   |    |     |             |              |       |       |             |
|-----------------------------------|----|-----|-------------|--------------|-------|-------|-------------|
| SNX6 + PtdIns(4,5)P <sub>2</sub>  | 20 | 500 | NB          | NB           | NB    | NB    | NB          |
| SNX23 + PtdIns(4,5)P <sub>2</sub> | 20 | 500 | 1.90 ± 0.50 | -6.73 ± 0.70 | -7.81 | -1.09 | 0.76 ± 0.10 |
| SNX25 + PtdIns(4,5)P <sub>2</sub> | 20 | 500 | 2.52 ± 1.11 | -6.85 ± 0.80 | -7.26 | -0.40 | 0.65 ± 0.09 |

|                                        |    |     |             |              |       |       |             |
|----------------------------------------|----|-----|-------------|--------------|-------|-------|-------------|
| <b>PX + PtdIns(3,4,5)P<sub>3</sub></b> |    |     |             |              |       |       |             |
| SNX1 + PtdIns(3,4,5)P <sub>3</sub>     | 20 | 500 | 26.5 ± 7.30 | -3.28 ± 0.19 | -6.57 | -4.04 | 0.91 ± 0.12 |
| SNX2 + PtdIns(3,4,5)P <sub>3</sub>     | 20 | 500 | 20.5 ± 3.6  | -2.88 ± 0.36 | -6.40 | -3.52 | 0.92 ± 0.09 |
| SNX23 + PtdIns(3,4,5)P <sub>3</sub>    | 20 | 500 | 5.20 ± 2.00 | -51.1 ± 7.10 | -7.22 | 43.90 | 0.85 ± 0.16 |
| SNX25 + PtdIns(3,4,5)P <sub>3</sub>    | 20 | 500 | 3.13 ± 0.43 | -12.3 ± 0.50 | -7.15 | 5.18  | 1.05 ± 0.10 |

|                                                        |    |     |             |              |       |       |             |
|--------------------------------------------------------|----|-----|-------------|--------------|-------|-------|-------------|
| <b>PX_Non-canonical_Mutants + PtdIns</b>               |    |     |             |              |       |       |             |
| SNX1_Y194A/K196A/K200A + PtdIns3P                      | 20 | 500 | NB          | NB           | NB    | NB    | NB          |
| SNX1_Y194A/K196A/K200A + PtdIns(3,4)P <sub>2</sub>     | 20 | 500 | NB          | NB           | NB    | NB    | NB          |
| SNX2_H187A/K189A/K193A + PtdIns3P                      | 20 | 500 | NB          | NB           | NB    | NB    | NB          |
| SNX2_H187A/K189A/K193A + PtdIns(3,4)P <sub>2</sub>     | 20 | 500 | NB          | NB           | NB    | NB    | NB          |
| SNX9_Y290A/R292A/K296A + PtdIns3P                      | 20 | 500 | 1.89 ± 0.38 | -13.4 ± 2.08 | -7.35 | -7.27 | 0.85 ± 0.12 |
| SNX9_Y290A/R292A/K296A + PtdIns(3,4)P <sub>2</sub>     | 20 | 500 | NB          | NB           | NB    | NB    | NB          |
| SNX13_H620A/R622A + PtdIns(3,4)P <sub>2</sub>          | 20 | 500 | NB          | NB           | NB    | NB    | NB          |
| SNX15_Y64A/R67A/R71A/R72A + PtdIns3P                   | 20 | 500 | 12.3 ± 0.84 | -2.29 ± 0.19 | -7.70 | -5.41 | 1.21 ± 0.09 |
| SNX15_Y64A/R67A/R71A/R72A + PtdIns(3,4)P <sub>2</sub>  | 20 | 500 | NB          | NB           | NB    | NB    | NB          |
| SNX23_H1224A/K1228A/K1230A + PtdIns(3,4)P <sub>2</sub> | 20 | 500 | NB          | NB           | NB    | NB    | NB          |
| SNX25_H558A/K560A + PtdIns(3,4,5)P <sub>3</sub>        | 20 | 500 | NB          | NB           | NB    | NB    | NB          |
| SNX29_H315A/K317A/K321A + PtdIns3P                     | 20 | 500 | 3.17 ± 0.29 | -7.83 ± 0.56 | -7.22 | 0.59  | 1.01 ± 0.08 |
| SNX29_H315A/K317A/K321A + PtdIns(3,4)P <sub>2</sub>    | 20 | 500 | NB          | NB           | NB    | NB    | NB          |
| PI3KC2α_H1453A/K1455A + PtdIns3P                       | 20 | 500 | NB          | NB           | NB    | NB    | NB          |
| PI3KC2α_H1453A/K1455A + PtdIns(3,4)P <sub>2</sub>      | 20 | 500 | NB          | NB           | NB    | NB    | NB          |
| p47phox_H51A/K55A + PtdIns3P                           | 20 | 500 | 15.2 ± 2.13 | -5.87 ± 1.23 | -6.88 | -2.74 | 0.93 ± 0.15 |
| p47phox_H51A/K55A + PtdIns(3,4)P <sub>2</sub>          | 20 | 500 | NB          | NB           | NB    | NB    | NB          |

|                                                                                 |    |     |        |              |       |       |             |
|---------------------------------------------------------------------------------|----|-----|--------|--------------|-------|-------|-------------|
| <b>Competitive titration [PX_PtdIns3P + PtdIns3P/ PtdIns(3,4)P<sub>2</sub>]</b> |    |     |        |              |       |       |             |
| SNX15_PtdIns3P + PtdIns3P                                                       | 20 | 500 | NB     | NB           | NB    | NB    | NB          |
| SNX15_PtdIns3P + PtdIns(3,4)P <sub>2</sub>                                      | 20 | 500 | 4.07 ± | -3.13 ± 0.17 | -6.71 | -5.18 | 0.90 ± 0.11 |

|                                           |    |     |                |              |       |       |             |
|-------------------------------------------|----|-----|----------------|--------------|-------|-------|-------------|
|                                           |    |     | 0.53           |              |       |       |             |
| SGK3_PtdIns3P + PtdIns3P                  | 20 | 500 | NB             | NB           | NB    | NB    | NB          |
| SGK3_PtdIns3P + PtdIns(3,4)P <sub>2</sub> | 20 | 500 | 9.04 ±<br>2.22 | -4.84 ± 0.90 | -6.88 | -2.04 | 0.75 ± 0.09 |
| SGK3_PtdIns(3,4)P <sub>2</sub> + PtdIns3P | 20 | 500 | 2.34 ±<br>0.51 | -13.6 ± 1.07 | -6.74 | 6.47  | 1.15 ± 0.11 |

a. Errors are standard deviation from at least two separate experiments.

**Supplementary Table 5.** Binding of selected PX domains to liposomes measured by BLiTz

|                 | Conc. of PX protein ( $\mu\text{M}$ ) | Conc. of Biotinylated Liposome ( $\mu\text{M}$ ) | $k_{\text{obs}}$ ( $\mu\text{M}^{-1}\text{S}^{-1}$ ) | $k_{\text{off}}$ ( $\text{S}^{-1}$ ) | $K_{\text{d}}$ ( $\mu\text{M}$ ) |
|-----------------|---------------------------------------|--------------------------------------------------|------------------------------------------------------|--------------------------------------|----------------------------------|
| <b>PtdIns3P</b> |                                       |                                                  |                                                      |                                      |                                  |
| SNX1            | 20                                    | 500                                              | NB                                                   | NB                                   | NB                               |
| SNX2            | 20                                    | 500                                              | NB                                                   | NB                                   | NB                               |
| SNX3            | 20                                    | 500                                              | 0.0233                                               | 0.0247                               | 1.06                             |
| SNX4            | 20                                    | 500                                              | 0.0121                                               | 0.0932                               | 7.703                            |
| SNX5            | 20                                    | 500                                              | NB                                                   | NB                                   | NB                               |
| SNX6            | 20                                    | 500                                              | NB                                                   | NB                                   | NB                               |
| SNX7            | 20                                    | 500                                              | 0.0031                                               | 0.0098                               | 3.161                            |
| SNX8            | Not Tested                            | Not Tested                                       | Not Tested                                           | Not Tested                           | Not Tested                       |
| SNX9            | 20                                    | 500                                              | 0.0256                                               | 0.0298                               | 1.164                            |
| SNX10           | 20                                    | 500                                              | 0.0236                                               | 0.3824                               | 16.20                            |
| SNX11           | 20                                    | 500                                              | 0.0332                                               | 0.0305                               | 0.9186                           |
| SNX12           | 20                                    | 500                                              | 0.0263                                               | 0.1901                               | 7.228                            |
| SNX13           | 20                                    | 500                                              | 0.0161                                               | 0.0932                               | 5.788                            |
| SNX14           | 20                                    | 500                                              | NB                                                   | NB                                   | NB                               |
| SNX15           | 20                                    | 500                                              | 0.0868                                               | 0.2733                               | 3.1486                           |
| SNX16           | 20                                    | 500                                              | 0.0168                                               | 0.0932                               | 5.54                             |
| SNX17           | 20                                    | 500                                              | 0.0342                                               | 0.0932                               | 2.725                            |
| SNX18           | Not Tested                            | Not Tested                                       | Not Tested                                           | Not Tested                           | Not Tested                       |
| SNX19           | 20                                    | 500                                              | 0.0121                                               | 0.0252                               | 2.082                            |
| SNX20           | Not Tested                            | Not Tested                                       | Not Tested                                           | Not Tested                           | Not Tested                       |
| SNX21           | Not Tested                            | Not Tested                                       | Not Tested                                           | Not Tested                           | Not Tested                       |
| SNX22           | 20                                    | 500                                              | 0.0727                                               | 0.0480                               | 0.660                            |
| SNX23           | 20                                    | 500                                              | 0.0599                                               | 0.0136                               | 0.227                            |
| SNX24           | 20                                    | 500                                              | 0.0376                                               | 0.0235                               | 0.625                            |
| SNX25           | 20                                    | 500                                              | NB                                                   | NB                                   | NB                               |
| SNX26           | Not Tested                            | Not Tested                                       | Not Tested                                           | Not Tested                           | Not Tested                       |
| SNX27           | 20                                    | 500                                              | 0.0153                                               | 0.0387                               | 2.529                            |
| SNX28           | Not Tested                            | Not Tested                                       | Not Tested                                           | Not Tested                           | Not Tested                       |
| SNX29           | 20                                    | 500                                              | 0.0201                                               | 0.0160                               | 0.796                            |
| SNX30           | Not Tested                            | Not Tested                                       | Not Tested                                           | Not Tested                           | Not Tested                       |
| SNX31           | 20                                    | 500                                              | 0.0208                                               | 0.2097                               | 10.08                            |
| SNX32           | 20                                    | 500                                              | NB                                                   | NB                                   | NB                               |
| SNX33           | Not Tested                            | Not Tested                                       | Not Tested                                           | Not Tested                           | Not Tested                       |
| SNX34           | Not Tested                            | Not Tested                                       | Not Tested                                           | Not Tested                           | Not Tested                       |
| p40phox         | 20                                    | 500                                              | 0.0095                                               | 0.0171                               | 1.8                              |
| p47phox         | 20                                    | 500                                              | 0.0325                                               | 0.0932                               | 2.867                            |
| PLD1            | Not Tested                            | Not Tested                                       | Not Tested                                           | Not Tested                           | Not Tested                       |
| PLD2            | Not Tested                            | Not Tested                                       | Not Tested                                           | Not Tested                           | Not Tested                       |
| HS1BP3          | 20                                    | 500                                              | 0.0256                                               | 0.0485                               | 1.895                            |
| PXK             | 20                                    | 500                                              | 0.0658                                               | 0.0932                               | 1.416                            |
| IRAS            | 20                                    | 500                                              | 0.0506                                               | 0.0509                               | 1.005                            |
| SGK3            | 20                                    | 500                                              | 0.0217                                               | 0.0160                               | 0.7373                           |
| SH3PXD2A        | 20                                    | 500                                              | 0.0154                                               | 0.1938                               | 12.584                           |
| SH3PXD2B        | Not Tested                            | Not Tested                                       | Not Tested                                           | Not Tested                           | Not Tested                       |
| PI3KC2 $\alpha$ | 20                                    | 500                                              | NB                                                   | NB                                   | NB                               |
| PI3KC2 $\beta$  | 20                                    | 500                                              | NB                                                   | NB                                   | NB                               |
| PI3KC2 $\gamma$ | 20                                    | 500                                              | NB                                                   | NB                                   | NB                               |
| RICS            | 20                                    | 500                                              | 0.0150                                               | 0.2097                               | 13.98                            |
| RPS6KC1         | 20                                    | 500                                              | 0.0634                                               | 0.0509                               | 0.8028                           |

|                                    | Conc. of PX protein ( $\mu\text{M}$ ) | Conc. of Biotinylated Liposome ( $\mu\text{M}$ ) | $k_{\text{obs.}}$ ( $\mu\text{M}^{-1}\text{S}^{-1}$ ) | $K_{\text{off}}$ ( $\text{S}^{-1}$ ) | $K_{\text{d}}$ ( $\mu\text{M}$ ) |
|------------------------------------|---------------------------------------|--------------------------------------------------|-------------------------------------------------------|--------------------------------------|----------------------------------|
| <b>PtdIns(3,4)<math>P_2</math></b> |                                       |                                                  |                                                       |                                      |                                  |
| SNX1                               | 20                                    | 500                                              | 0.0251                                                | 0.0201                               | 0.80                             |
| SNX2                               | 20                                    | 500                                              | 0.0584                                                | 0.0462                               | 0.792                            |
| SNX5                               | 20                                    | 500                                              | NB                                                    | NB                                   | NB                               |
| SNX6                               | 20                                    | 500                                              | NB                                                    | NB                                   | NB                               |
| SNX9                               | 20                                    | 500                                              | 0.0102                                                | 0.0343                               | 3.363                            |
| SNX13                              | 20                                    | 500                                              | 0.0070                                                | 0.0361                               | 5.157                            |
| SNX15                              | 20                                    | 500                                              | 0.2077                                                | 0.0343                               | 0.165                            |
| SNX17                              | 20                                    | 500                                              | NB                                                    | NB                                   | NB                               |
| SNX22                              | 20                                    | 500                                              | 0.0327                                                | 0.0361                               | 1.162                            |
| SNX23                              | 20                                    | 500                                              | 0.0289                                                | 0.0302                               | 1.04                             |
| SNX24                              | 20                                    | 500                                              | 0.0236                                                | 0.0267                               | 1.158                            |
| SNX25                              | 20                                    | 500                                              | 0.0113                                                | 0.0746                               | 6.602                            |
| SNX27                              | 20                                    | 500                                              | NB                                                    | NB                                   | NB                               |
| SNX29                              | 20                                    | 500                                              | 0.0230                                                | 0.0343                               | 1.492                            |
| SNX32                              | 20                                    | 500                                              | NB                                                    | NB                                   | NB                               |
| p40phox                            | 20                                    | 500                                              | NB                                                    | NB                                   | NB                               |
| p47phox                            | 20                                    | 500                                              | 0.0163                                                | 0.0475                               | 2.914                            |
| HS1BP3                             | 20                                    | 500                                              | 0.0148                                                | 0.0746                               | 5.041                            |
| IRAS                               | 20                                    | 500                                              | 0.0156                                                | 0.0343                               | 2.198                            |
| SGK3                               | 20                                    | 500                                              | 0.0207                                                | 0.0361                               | 1.744                            |
| PI3KC2 $\alpha$                    | 20                                    | 500                                              | 0.0166                                                | 0.0343                               | 2.066                            |
| PI3KC2 $\beta$                     | 20                                    | 500                                              | 0.0243                                                | 0.0488                               | 2.008                            |
| PI3KC2 $\gamma$                    | 20                                    | 500                                              | 0.0231                                                | 0.0348                               | 1.506                            |
| RPS6KC1                            | 20                                    | 500                                              | 0.0274                                                | 0.0343                               | 1.252                            |

|                                    | Conc. of PX protein ( $\mu\text{M}$ ) | Conc. of Biotinylated Liposome ( $\mu\text{M}$ ) | $k_{\text{obs.}}$ ( $\mu\text{M}^{-1}\text{S}^{-1}$ ) | $K_{\text{off}}$ ( $\text{S}^{-1}$ ) | $K_{\text{d}}$ ( $\mu\text{M}$ ) |
|------------------------------------|---------------------------------------|--------------------------------------------------|-------------------------------------------------------|--------------------------------------|----------------------------------|
| <b>PtdIns(4,5)<math>P_2</math></b> |                                       |                                                  |                                                       |                                      |                                  |
| SNX1                               | 20                                    | 500                                              | 0.0138                                                | 0.0343                               | 2.485                            |
| SNX2                               | 20                                    | 500                                              | 0.0120                                                | 0.0343                               | 2.858                            |
| SNX5                               | 20                                    | 500                                              | NB                                                    | NB                                   | NB                               |
| SNX6                               | 20                                    | 500                                              | NB                                                    | NB                                   | NB                               |
| SNX15                              | 20                                    | 500                                              | 0.0319                                                | 0.0343                               | 1.075                            |
| SNX17                              | 20                                    | 500                                              | NB                                                    | NB                                   | NB                               |
| SNX23                              | 20                                    | 500                                              | 0.0150                                                | 0.0267                               | 1.78                             |
| SNX24                              | 20                                    | 500                                              | 0.0146                                                | 0.0343                               | 2.349                            |
| SNX25                              | 20                                    | 500                                              | 0.0533                                                | 0.0302                               | 0.566                            |
| SNX27                              | 20                                    | 500                                              | NB                                                    | NB                                   | NB                               |
| SNX29                              | 20                                    | 500                                              | 0.0253                                                | 0.0475                               | 1.877                            |
| p40phox                            | 20                                    | 500                                              | NB                                                    | NB                                   | NB                               |
| p47phox                            | 20                                    | 500                                              | 0.0320                                                | 0.3837                               | 11.99                            |
| SGK3                               | 20                                    | 500                                              | 0.0120                                                | 0.0343                               | 2.858                            |
| PI3KC2 $\alpha$                    | 20                                    | 500                                              | 0.0438                                                | 0.3837                               | 8.76                             |

|                                      | Conc. of PX<br>protein ( $\mu\text{M}$ ) | Conc. of<br>Biotinylated<br>Liposome<br>( $\mu\text{M}$ ) | $k_{\text{obs.}}$<br>( $\mu\text{M}^{-1}\text{S}^{-1}$ ) | $K_{\text{off}}$<br>( $\text{S}^{-1}$ ) | $K_{\text{d}}$<br>( $\mu\text{M}$ ) |
|--------------------------------------|------------------------------------------|-----------------------------------------------------------|----------------------------------------------------------|-----------------------------------------|-------------------------------------|
| <b>PtdIns(3,4,5)<math>P_3</math></b> |                                          |                                                           |                                                          |                                         |                                     |
| SNX1                                 | 20                                       | 500                                                       | 0.0169                                                   | 0.1193                                  | 7.059                               |
| SNX2                                 | 20                                       | 500                                                       | 0.0113                                                   | 0.0746                                  | 6.602                               |
| SNX5                                 | 20                                       | 500                                                       | NB                                                       | NB                                      | NB                                  |
| SNX6                                 | 20                                       | 500                                                       | NB                                                       | NB                                      | NB                                  |
| SNX15                                | 20                                       | 500                                                       | 0.0140                                                   | 0.0348                                  | 2.486                               |
| SNX17                                | 20                                       | 500                                                       | NB                                                       | NB                                      | NB                                  |
| SNX23                                | 20                                       | 500                                                       | 0.0159                                                   | 0.0343                                  | 2.157                               |
| SNX24                                | 20                                       | 500                                                       | 0.0135                                                   | 0.0429                                  | 3.177                               |
| SNX25                                | 20                                       | 500                                                       | 0.0159                                                   | 0.0198                                  | 1.245                               |
| SNX27                                | 20                                       | 500                                                       | NB                                                       | NB                                      | NB                                  |
| SNX29                                | 20                                       | 500                                                       | 0.0113                                                   | 0.0348                                  | 3.079                               |
| p40phox                              | 20                                       | 500                                                       | NB                                                       | NB                                      | NB                                  |
| p47phox                              | 20                                       | 500                                                       | 0.0028                                                   | 0.0304                                  | 10.857                              |
| SGK3                                 | 20                                       | 500                                                       | 0.0148                                                   | 0.0746                                  | 5.041                               |
| PI3KC2 $\alpha$                      | 20                                       | 500                                                       | 0.0153                                                   | 0.0746                                  | 4.876                               |
